# Supplementary material for: Topological data analysis reveals a core gene expression backbone that defines form and function across flowering plants
Source: PLoS Biol. 2023 Dec 5;21(12):e3002397. doi: 10.1371/journal.pbio.3002397 (PMC10723737; doi:10.1371/journal.pbio.3002397)
Supplement: S6 Dataset — (CSV) [file pbio.3002397.s007.csv]

sra	sample_id	species	family	tissue	stress	bioproject
SRR1598911	A_hypochondria_001	A_hypochondria	Amaranthacea	flower	healthy	PRJNA263128
SRR1598912	A_hypochondria_002	A_hypochondria	Amaranthacea	leaf	healthy	PRJNA263128
SRR1598913	A_hypochondria_003	A_hypochondria	Amaranthacea	root	healthy	PRJNA263128
SRR1598910	A_hypochondria_004	A_hypochondria	Amaranthacea	stem	healthy	PRJNA263128
SRR1598914	A_hypochondria_005	A_hypochondria	Amaranthacea	other	drought	PRJNA263128
SRR1598909	A_hypochondria_006	A_hypochondria	Amaranthacea	seed	healthy	PRJNA263128
SRR1598916	A_hypochondria_007	A_hypochondria	Amaranthacea	seed	healthy	PRJNA263128
SRR1598915	A_hypochondria_008	A_hypochondria	Amaranthacea	seedling	healthy	PRJNA263128
SRR1642915	A_officinalis_001	A_officinalis	Asparagaceae	flower	healthy	NA
SRR1642914	A_officinalis_002	A_officinalis	Asparagaceae	flower	healthy	NA
SRR1642913	A_officinalis_003	A_officinalis	Asparagaceae	flower	healthy	NA
SRR1642911	A_officinalis_004	A_officinalis	Asparagaceae	flower	healthy	NA
SRR1642910	A_officinalis_005	A_officinalis	Asparagaceae	flower	healthy	NA
SRR3765676	A_officinalis_006	A_officinalis	Asparagaceae	root	healthy	NA
SRR5818212	A_sativa_001	A_sativa	Poaceae	leaf	drought	NA
SRR5818213	A_sativa_001	A_sativa	Poaceae	leaf	drought	NA
SRR5818216	A_sativa_001	A_sativa	Poaceae	leaf	drought	NA
SRR5818214	A_sativa_002	A_sativa	Poaceae	leaf	healthy	NA
SRR5818215	A_sativa_002	A_sativa	Poaceae	leaf	healthy	NA
SRR5818217	A_sativa_002	A_sativa	Poaceae	leaf	healthy	NA
SRR1219535	A_sativum_001	A_sativum	Amaryllidaceae	leaf	healthy	NA
SRR1219644	A_sativum_002	A_sativum	Amaryllidaceae	fruit	healthy	NA
SRR1219646	A_sativum_003	A_sativum	Amaryllidaceae	root	healthy	NA
SRR1219796	A_sativum_004	A_sativum	Amaryllidaceae	flower	healthy	NA
SRR1219989	A_sativum_005	A_sativum	Amaryllidaceae	flower	healthy	NA
SRR1220207	A_sativum_006	A_sativum	Amaryllidaceae	fruit	healthy	NA
SRR8581126	A_sativum_007	A_sativum	Amaryllidaceae	fruit	cold	NA
SRR8581127	A_sativum_007	A_sativum	Amaryllidaceae	fruit	cold	NA
SRR8581131	A_sativum_007	A_sativum	Amaryllidaceae	fruit	cold	NA
SRR8581128	A_sativum_008	A_sativum	Amaryllidaceae	fruit	healthy	NA
SRR8581129	A_sativum_008	A_sativum	Amaryllidaceae	fruit	healthy	NA
SRR8581130	A_sativum_008	A_sativum	Amaryllidaceae	fruit	healthy	NA
SRR12278226	A_sativum_009	A_sativum	Amaryllidaceae	seed	healthy	NA
SRR12278227	A_sativum_009	A_sativum	Amaryllidaceae	seed	healthy	NA
SRR12278228	A_sativum_010	A_sativum	Amaryllidaceae	seed	healthy	NA
SRR12278229	A_sativum_010	A_sativum	Amaryllidaceae	seed	healthy	NA
SRR12278230	A_sativum_011	A_sativum	Amaryllidaceae	seed	healthy	NA
SRR12278231	A_sativum_011	A_sativum	Amaryllidaceae	seed	healthy	NA
SRR11100874	A_sativum_012	A_sativum	Amaryllidaceae	fruit	healthy	NA
SRR11100875	A_sativum_012	A_sativum	Amaryllidaceae	fruit	healthy	NA
SRR11100876	A_sativum_012	A_sativum	Amaryllidaceae	fruit	healthy	NA
SRR11100877	A_sativum_013	A_sativum	Amaryllidaceae	fruit	healthy	NA
SRR11100878	A_sativum_013	A_sativum	Amaryllidaceae	fruit	healthy	NA
SRR11100879	A_sativum_013	A_sativum	Amaryllidaceae	fruit	healthy	NA
SRR11100880	A_sativum_014	A_sativum	Amaryllidaceae	fruit	healthy	NA
SRR11100881	A_sativum_014	A_sativum	Amaryllidaceae	fruit	healthy	NA
SRR11100882	A_sativum_014	A_sativum	Amaryllidaceae	fruit	healthy	NA
SRR11100883	A_sativum_015	A_sativum	Amaryllidaceae	fruit	healthy	NA
SRR11100884	A_sativum_015	A_sativum	Amaryllidaceae	fruit	healthy	NA
SRR11100885	A_sativum_015	A_sativum	Amaryllidaceae	fruit	healthy	NA
SRR11100886	A_sativum_016	A_sativum	Amaryllidaceae	fruit	healthy	NA
SRR11100887	A_sativum_016	A_sativum	Amaryllidaceae	fruit	healthy	NA
SRR11100888	A_sativum_016	A_sativum	Amaryllidaceae	fruit	healthy	NA
SRR11100889	A_sativum_017	A_sativum	Amaryllidaceae	fruit	healthy	NA
SRR11100890	A_sativum_017	A_sativum	Amaryllidaceae	fruit	healthy	NA
SRR11100891	A_sativum_017	A_sativum	Amaryllidaceae	fruit	healthy	NA
SRR11100892	A_sativum_018	A_sativum	Amaryllidaceae	fruit	healthy	NA
SRR11100893	A_sativum_018	A_sativum	Amaryllidaceae	fruit	healthy	NA
SRR11100894	A_sativum_018	A_sativum	Amaryllidaceae	fruit	healthy	NA
SRR11100895	A_sativum_019	A_sativum	Amaryllidaceae	fruit	healthy	NA
SRR11100896	A_sativum_019	A_sativum	Amaryllidaceae	fruit	healthy	NA
SRR11100897	A_sativum_019	A_sativum	Amaryllidaceae	fruit	healthy	NA
SRR11100898	A_sativum_020	A_sativum	Amaryllidaceae	flower	healthy	NA
SRR11100899	A_sativum_020	A_sativum	Amaryllidaceae	flower	healthy	NA
SRR11100900	A_sativum_020	A_sativum	Amaryllidaceae	flower	healthy	NA
SRR11100901	A_sativum_021	A_sativum	Amaryllidaceae	leaf	healthy	NA
SRR11100902	A_sativum_021	A_sativum	Amaryllidaceae	leaf	healthy	NA
SRR11100903	A_sativum_021	A_sativum	Amaryllidaceae	leaf	healthy	NA
SRR11100904	A_sativum_022	A_sativum	Amaryllidaceae	stem	healthy	NA
SRR11100905	A_sativum_022	A_sativum	Amaryllidaceae	stem	healthy	NA
SRR11100906	A_sativum_022	A_sativum	Amaryllidaceae	stem	healthy	NA
SRR11100907	A_sativum_023	A_sativum	Amaryllidaceae	other	healthy	NA
SRR11100908	A_sativum_023	A_sativum	Amaryllidaceae	other	healthy	NA
SRR11100909	A_sativum_023	A_sativum	Amaryllidaceae	other	healthy	NA
SRR11100910	A_sativum_024	A_sativum	Amaryllidaceae	root	healthy	NA
SRR11100911	A_sativum_024	A_sativum	Amaryllidaceae	root	healthy	NA
SRR11100912	A_sativum_024	A_sativum	Amaryllidaceae	root	healthy	NA
SRR11100913	A_sativum_025	A_sativum	Amaryllidaceae	flower	healthy	NA
SRR11100914	A_sativum_025	A_sativum	Amaryllidaceae	flower	healthy	NA
SRR11100915	A_sativum_025	A_sativum	Amaryllidaceae	flower	healthy	NA
SRR10102510	A_sativum_026	A_sativum	Amaryllidaceae	stem	other	NA
SRR10102511	A_sativum_026	A_sativum	Amaryllidaceae	stem	other	NA
SRR10102512	A_sativum_026	A_sativum	Amaryllidaceae	stem	other	NA
SRR10102513	A_sativum_027	A_sativum	Amaryllidaceae	stem	healthy	NA
SRR10102514	A_sativum_027	A_sativum	Amaryllidaceae	stem	healthy	NA
SRR10102515	A_sativum_027	A_sativum	Amaryllidaceae	stem	healthy	NA
SRR7196287	A_sativum_028	A_sativum	Amaryllidaceae	fruit	cold	NA
SRR7196288	A_sativum_028	A_sativum	Amaryllidaceae	fruit	cold	NA
SRR7196298	A_sativum_028	A_sativum	Amaryllidaceae	fruit	cold	NA
SRR7196289	A_sativum_029	A_sativum	Amaryllidaceae	fruit	cold	NA
SRR7196290	A_sativum_029	A_sativum	Amaryllidaceae	fruit	cold	NA
SRR7196297	A_sativum_029	A_sativum	Amaryllidaceae	fruit	cold	NA
SRR7196291	A_sativum_030	A_sativum	Amaryllidaceae	fruit	cold	NA
SRR7196292	A_sativum_030	A_sativum	Amaryllidaceae	fruit	cold	NA
SRR7196294	A_sativum_030	A_sativum	Amaryllidaceae	fruit	cold	NA
SRR7196293	A_sativum_031	A_sativum	Amaryllidaceae	fruit	healthy	NA
SRR7196295	A_sativum_031	A_sativum	Amaryllidaceae	fruit	healthy	NA
SRR7196296	A_sativum_031	A_sativum	Amaryllidaceae	fruit	healthy	NA
SRR9844294	A_thaliana_001	A_thaliana	Brassicaceae	leaf	healthy	PRJNA556865
SRR9844295	A_thaliana_001	A_thaliana	Brassicaceae	leaf	healthy	PRJNA556865
SRR9844296	A_thaliana_001	A_thaliana	Brassicaceae	leaf	healthy	PRJNA556865
SRR9844300	A_thaliana_002	A_thaliana	Brassicaceae	leaf	drought	PRJNA556865
SRR9844301	A_thaliana_002	A_thaliana	Brassicaceae	leaf	drought	PRJNA556865
SRR9844302	A_thaliana_002	A_thaliana	Brassicaceae	leaf	drought	PRJNA556865
SRR11458863	A_thaliana_003	A_thaliana	Brassicaceae	leaf	healthy	PRJNA620359
SRR11458867	A_thaliana_003	A_thaliana	Brassicaceae	leaf	healthy	PRJNA620359
SRR11458871	A_thaliana_003	A_thaliana	Brassicaceae	leaf	healthy	PRJNA620359
SRR11458875	A_thaliana_003	A_thaliana	Brassicaceae	leaf	healthy	PRJNA620359
SRR11458864	A_thaliana_004	A_thaliana	Brassicaceae	leaf	salt	PRJNA620359
SRR11458868	A_thaliana_004	A_thaliana	Brassicaceae	leaf	salt	PRJNA620359
SRR11458872	A_thaliana_004	A_thaliana	Brassicaceae	leaf	salt	PRJNA620359
SRR11458876	A_thaliana_004	A_thaliana	Brassicaceae	leaf	salt	PRJNA620359
SRR3724649	A_thaliana_005	A_thaliana	Brassicaceae	leaf	cold	PRJNA324514
SRR3724650	A_thaliana_005	A_thaliana	Brassicaceae	leaf	cold	PRJNA324514
SRR3724651	A_thaliana_006	A_thaliana	Brassicaceae	leaf	cold	PRJNA324514
SRR3724652	A_thaliana_006	A_thaliana	Brassicaceae	leaf	cold	PRJNA324514
SRR3724663	A_thaliana_007	A_thaliana	Brassicaceae	leaf	cold	PRJNA324514
SRR3724668	A_thaliana_007	A_thaliana	Brassicaceae	leaf	cold	PRJNA324514
SRR3724737	A_thaliana_008	A_thaliana	Brassicaceae	leaf	cold	PRJNA324514
SRR3724738	A_thaliana_008	A_thaliana	Brassicaceae	leaf	cold	PRJNA324514
SRR3724739	A_thaliana_009	A_thaliana	Brassicaceae	leaf	cold	PRJNA324514
SRR3724741	A_thaliana_009	A_thaliana	Brassicaceae	leaf	cold	PRJNA324514
SRR3724768	A_thaliana_010	A_thaliana	Brassicaceae	leaf	heat	PRJNA324514
SRR3724774	A_thaliana_010	A_thaliana	Brassicaceae	leaf	heat	PRJNA324514
SRR3724778	A_thaliana_011	A_thaliana	Brassicaceae	leaf	heat	PRJNA324514
SRR3724782	A_thaliana_011	A_thaliana	Brassicaceae	leaf	heat	PRJNA324514
SRR3724785	A_thaliana_012	A_thaliana	Brassicaceae	leaf	heat	PRJNA324514
SRR3724786	A_thaliana_012	A_thaliana	Brassicaceae	leaf	heat	PRJNA324514
SRR3724787	A_thaliana_013	A_thaliana	Brassicaceae	leaf	heat	PRJNA324514
SRR3724798	A_thaliana_013	A_thaliana	Brassicaceae	leaf	heat	PRJNA324514
SRR3724806	A_thaliana_014	A_thaliana	Brassicaceae	leaf	heat	PRJNA324514
SRR3724814	A_thaliana_014	A_thaliana	Brassicaceae	leaf	heat	PRJNA324514
SRR3581347	A_thaliana_015	A_thaliana	Brassicaceae	root	healthy	PRJNA314076
SRR3581356	A_thaliana_016	A_thaliana	Brassicaceae	root	healthy	PRJNA314076
SRR3581346	A_thaliana_017	A_thaliana	Brassicaceae	stem	healthy	PRJNA314076
SRR3581681	A_thaliana_018	A_thaliana	Brassicaceae	stem	healthy	PRJNA314076
SRR3581706	A_thaliana_019	A_thaliana	Brassicaceae	seed	healthy	PRJNA314076
SRR3581709	A_thaliana_019	A_thaliana	Brassicaceae	seed	healthy	PRJNA314076
SRR3581712	A_thaliana_019	A_thaliana	Brassicaceae	seed	healthy	PRJNA314076
SRR3581693	A_thaliana_020	A_thaliana	Brassicaceae	flower	healthy	PRJNA314076
SRR3581694	A_thaliana_020	A_thaliana	Brassicaceae	flower	healthy	PRJNA314076
SRR3581695	A_thaliana_020	A_thaliana	Brassicaceae	flower	healthy	PRJNA314076
SRR3581696	A_thaliana_020	A_thaliana	Brassicaceae	flower	healthy	PRJNA314076
SRR3581697	A_thaliana_020	A_thaliana	Brassicaceae	flower	healthy	PRJNA314076
SRR3581698	A_thaliana_020	A_thaliana	Brassicaceae	flower	healthy	PRJNA314076
SRR3581699	A_thaliana_020	A_thaliana	Brassicaceae	flower	healthy	PRJNA314076
SRR3581700	A_thaliana_020	A_thaliana	Brassicaceae	flower	healthy	PRJNA314076
SRR3581701	A_thaliana_020	A_thaliana	Brassicaceae	flower	healthy	PRJNA314076
SRR3581707	A_thaliana_021	A_thaliana	Brassicaceae	fruit	healthy	PRJNA314076
SRR3581710	A_thaliana_021	A_thaliana	Brassicaceae	fruit	healthy	PRJNA314076
SRR3581713	A_thaliana_021	A_thaliana	Brassicaceae	fruit	healthy	PRJNA314076
SRR5293260	A_trichopoda_001	A_trichopoda	Amborellaceae	root	healthy	PRJNA212863
SRR5293261	A_trichopoda_002	A_trichopoda	Amborellaceae	leaf	healthy	PRJNA212863
SRR5293262	A_trichopoda_003	A_trichopoda	Amborellaceae	leaf	healthy	PRJNA212863
SRR5293263	A_trichopoda_004	A_trichopoda	Amborellaceae	flower	healthy	PRJNA212863
SRR5293265	A_trichopoda_005	A_trichopoda	Amborellaceae	stem	healthy	PRJNA212863
SRR5293264	A_trichopoda_006	A_trichopoda	Amborellaceae	stem	healthy	PRJNA212863
SRR5293266	A_trichopoda_007	A_trichopoda	Amborellaceae	flower	healthy	PRJNA212863
SRR5293267	A_trichopoda_008	A_trichopoda	Amborellaceae	flower	healthy	PRJNA212863
SRR5293268	A_trichopoda_009	A_trichopoda	Amborellaceae	seedling	healthy	PRJNA212863
SRR5293269	A_trichopoda_010	A_trichopoda	Amborellaceae	flower	healthy	PRJNA212863
SRR5293270	A_trichopoda_011	A_trichopoda	Amborellaceae	flower	healthy	PRJNA212863
SRR5293271	A_trichopoda_012	A_trichopoda	Amborellaceae	seedling	healthy	PRJNA212863
SRR5293272	A_trichopoda_013	A_trichopoda	Amborellaceae	fruit	healthy	PRJNA212863
SRR5293273	A_trichopoda_014	A_trichopoda	Amborellaceae	flower	healthy	PRJNA212863
SRR5293274	A_trichopoda_015	A_trichopoda	Amborellaceae	flower	healthy	PRJNA212863
SRR5293275	A_trichopoda_016	A_trichopoda	Amborellaceae	seedling	healthy	PRJNA212863
SRR5293276	A_trichopoda_017	A_trichopoda	Amborellaceae	flower	healthy	PRJNA212863
SRR5293277	A_trichopoda_018	A_trichopoda	Amborellaceae	flower	healthy	PRJNA212863
SRR5293278	A_trichopoda_019	A_trichopoda	Amborellaceae	seedling	healthy	PRJNA212863
SRR522511	B_distachyon_001	B_distachyon	Poaceae	leaf	healthy	PRJNA170607
SRR522512	B_distachyon_001	B_distachyon	Poaceae	leaf	healthy	PRJNA170607
SRR522513	B_distachyon_002	B_distachyon	Poaceae	leaf	drought	PRJNA170607
SRR522514	B_distachyon_002	B_distachyon	Poaceae	leaf	drought	PRJNA170607
SRR522515	B_distachyon_003	B_distachyon	Poaceae	leaf	healthy	PRJNA170607
SRR522516	B_distachyon_003	B_distachyon	Poaceae	leaf	healthy	PRJNA170607
SRR522517	B_distachyon_004	B_distachyon	Poaceae	leaf	drought	PRJNA170607
SRR522518	B_distachyon_004	B_distachyon	Poaceae	leaf	drought	PRJNA170607
SRR5012158	B_distachyon_005	B_distachyon	Poaceae	flower	heat	PRJNA350873
SRR5012165	B_distachyon_005	B_distachyon	Poaceae	flower	heat	PRJNA350873
SRR5012159	B_distachyon_006	B_distachyon	Poaceae	leaf	heat	PRJNA350873
SRR5012161	B_distachyon_006	B_distachyon	Poaceae	leaf	heat	PRJNA350873
SRR5012160	B_distachyon_007	B_distachyon	Poaceae	flower	healthy	PRJNA350873
SRR5012169	B_distachyon_007	B_distachyon	Poaceae	flower	healthy	PRJNA350873
SRR5012162	B_distachyon_009	B_distachyon	Poaceae	leaf	healthy	PRJNA350873
SRR5012164	B_distachyon_009	B_distachyon	Poaceae	leaf	healthy	PRJNA350873
SRR5012163	B_distachyon_010	B_distachyon	Poaceae	leaf	heat	PRJNA350873
SRR5012166	B_distachyon_010	B_distachyon	Poaceae	leaf	heat	PRJNA350873
SRR5012167	B_distachyon_011	B_distachyon	Poaceae	leaf	healthy	PRJNA350873
SRR5012168	B_distachyon_011	B_distachyon	Poaceae	leaf	healthy	PRJNA350873
SRR349785	B_distachyon_012	B_distachyon	Poaceae	leaf	healthy
SRR352143	B_distachyon_012	B_distachyon	Poaceae	leaf	healthy
SRR349786	B_distachyon_013	B_distachyon	Poaceae	flower	healthy
SRR349787	B_distachyon_014	B_distachyon	Poaceae	flower	healthy
SRR352137	B_distachyon_015	B_distachyon	Poaceae	flower	healthy
SRR352138	B_distachyon_016	B_distachyon	Poaceae	seed	healthy
SRR352144	B_distachyon_016	B_distachyon	Poaceae	seed	healthy
SRR352139	B_distachyon_017	B_distachyon	Poaceae	seed	healthy
SRR352140	B_distachyon_018	B_distachyon	Poaceae	flower	healthy
SRR352141	B_distachyon_019	B_distachyon	Poaceae	seed	healthy
SRR352142	B_distachyon_020	B_distachyon	Poaceae	seed	healthy
SRR10238151	B_hispida_001	B_hispida	Cucurbitaceae	fruit	healthy	PRJNA576156
SRR10238165	B_hispida_001	B_hispida	Cucurbitaceae	fruit	healthy	PRJNA576156
SRR10238166	B_hispida_001	B_hispida	Cucurbitaceae	fruit	healthy	PRJNA576156
SRR10238152	B_hispida_002	B_hispida	Cucurbitaceae	fruit	healthy	PRJNA576156
SRR10238153	B_hispida_002	B_hispida	Cucurbitaceae	fruit	healthy	PRJNA576156
SRR10238154	B_hispida_002	B_hispida	Cucurbitaceae	fruit	healthy	PRJNA576156
SRR10238155	B_hispida_003	B_hispida	Cucurbitaceae	fruit	healthy	PRJNA576156
SRR10238156	B_hispida_003	B_hispida	Cucurbitaceae	fruit	healthy	PRJNA576156
SRR10238157	B_hispida_003	B_hispida	Cucurbitaceae	fruit	healthy	PRJNA576156
SRR10238158	B_hispida_004	B_hispida	Cucurbitaceae	fruit	healthy	PRJNA576156
SRR10238167	B_hispida_004	B_hispida	Cucurbitaceae	fruit	healthy	PRJNA576156
SRR10238168	B_hispida_004	B_hispida	Cucurbitaceae	fruit	healthy	PRJNA576156
SRR10238159	B_hispida_005	B_hispida	Cucurbitaceae	fruit	healthy	PRJNA576156
SRR10238160	B_hispida_005	B_hispida	Cucurbitaceae	fruit	healthy	PRJNA576156
SRR10238161	B_hispida_005	B_hispida	Cucurbitaceae	fruit	healthy	PRJNA576156
SRR10238162	B_hispida_006	B_hispida	Cucurbitaceae	fruit	healthy	PRJNA576156
SRR10238163	B_hispida_006	B_hispida	Cucurbitaceae	fruit	healthy	PRJNA576156
SRR10238164	B_hispida_006	B_hispida	Cucurbitaceae	fruit	healthy	PRJNA576156
SRR8758652	B_hispida_007	B_hispida	Cucurbitaceae	leaf	drought	PRJNA526796
SRR8758655	B_hispida_007	B_hispida	Cucurbitaceae	leaf	drought	PRJNA526796
SRR8758659	B_hispida_007	B_hispida	Cucurbitaceae	leaf	drought	PRJNA526796
SRR8758653	B_hispida_008	B_hispida	Cucurbitaceae	leaf	healthy	PRJNA526796
SRR8758656	B_hispida_008	B_hispida	Cucurbitaceae	leaf	healthy	PRJNA526796
SRR8758658	B_hispida_008	B_hispida	Cucurbitaceae	leaf	healthy	PRJNA526796
SRR8758654	B_hispida_009	B_hispida	Cucurbitaceae	leaf	drought	PRJNA526796
SRR8758660	B_hispida_009	B_hispida	Cucurbitaceae	leaf	drought	PRJNA526796
SRR8758661	B_hispida_009	B_hispida	Cucurbitaceae	leaf	drought	PRJNA526796
SRR8758657	B_hispida_010	B_hispida	Cucurbitaceae	leaf	healthy	PRJNA526796
SRR8758662	B_hispida_010	B_hispida	Cucurbitaceae	leaf	healthy	PRJNA526796
SRR8758663	B_hispida_010	B_hispida	Cucurbitaceae	leaf	healthy	PRJNA526796
SRR8464307	B_hispida_011	B_hispida	Cucurbitaceae	leaf	heat	PRJNA514971
SRR8464315	B_hispida_011	B_hispida	Cucurbitaceae	leaf	heat	PRJNA514971
SRR8464316	B_hispida_011	B_hispida	Cucurbitaceae	leaf	heat	PRJNA514971
SRR8464308	B_hispida_012	B_hispida	Cucurbitaceae	leaf	heat	PRJNA514971
SRR8464323	B_hispida_012	B_hispida	Cucurbitaceae	leaf	heat	PRJNA514971
SRR8464324	B_hispida_012	B_hispida	Cucurbitaceae	leaf	heat	PRJNA514971
SRR8464309	B_hispida_013	B_hispida	Cucurbitaceae	leaf	healthy	PRJNA514971
SRR8464310	B_hispida_013	B_hispida	Cucurbitaceae	leaf	healthy	PRJNA514971
SRR8464311	B_hispida_013	B_hispida	Cucurbitaceae	leaf	healthy	PRJNA514971
SRR8464312	B_hispida_014	B_hispida	Cucurbitaceae	leaf	healthy	PRJNA514971
SRR8464313	B_hispida_014	B_hispida	Cucurbitaceae	leaf	healthy	PRJNA514971
SRR8464314	B_hispida_014	B_hispida	Cucurbitaceae	leaf	healthy	PRJNA514971
SRR8464317	B_hispida_015	B_hispida	Cucurbitaceae	leaf	biotic	PRJNA514971
SRR8464318	B_hispida_015	B_hispida	Cucurbitaceae	leaf	biotic	PRJNA514971
SRR8464328	B_hispida_015	B_hispida	Cucurbitaceae	leaf	biotic	PRJNA514971
SRR8464319	B_hispida_016	B_hispida	Cucurbitaceae	leaf	healthy	PRJNA514971
SRR8464325	B_hispida_016	B_hispida	Cucurbitaceae	leaf	healthy	PRJNA514971
SRR8464326	B_hispida_016	B_hispida	Cucurbitaceae	leaf	healthy	PRJNA514971
SRR8464320	B_hispida_017	B_hispida	Cucurbitaceae	leaf	healthy	PRJNA514971
SRR8464321	B_hispida_017	B_hispida	Cucurbitaceae	leaf	healthy	PRJNA514971
SRR8464322	B_hispida_017	B_hispida	Cucurbitaceae	leaf	healthy	PRJNA514971
SRR8464327	B_hispida_018	B_hispida	Cucurbitaceae	leaf	biotic	PRJNA514971
SRR8464329	B_hispida_018	B_hispida	Cucurbitaceae	leaf	biotic	PRJNA514971
SRR8464330	B_hispida_018	B_hispida	Cucurbitaceae	leaf	biotic	NA
SRR2452449	B_juncea_001	B_juncea	Brassicaceae	fruit	healthy	PRJNA296365
SRR2452450	B_juncea_002	B_juncea	Brassicaceae	fruit	cold	PRJNA296365
SRR2452451	B_juncea_003	B_juncea	Brassicaceae	fruit	cold	PRJNA296365
SRR2452455	B_juncea_004	B_juncea	Brassicaceae	fruit	healthy	PRJNA296365
SRR2452456	B_juncea_005	B_juncea	Brassicaceae	fruit	cold	PRJNA296365
SRR2452457	B_juncea_006	B_juncea	Brassicaceae	fruit	cold	PRJNA296365
SRR2452458	B_juncea_007	B_juncea	Brassicaceae	fruit	healthy	PRJNA296365
SRR2452459	B_juncea_008	B_juncea	Brassicaceae	fruit	cold	PRJNA296365
SRR2452460	B_juncea_009	B_juncea	Brassicaceae	fruit	cold	PRJNA296365
SRR2452461	B_juncea_010	B_juncea	Brassicaceae	fruit	healthy	PRJNA296365
SRR2452462	B_juncea_011	B_juncea	Brassicaceae	fruit	cold	PRJNA296365
SRR2452463	B_juncea_012	B_juncea	Brassicaceae	fruit	cold	PRJNA296365
SRR1048145	B_juncea_013	B_juncea	Brassicaceae	seedling	healthy	PRJNA231241
SRR1048146	B_juncea_014	B_juncea	Brassicaceae	seedling	heat	PRJNA231241
SRR1048148	B_juncea_015	B_juncea	Brassicaceae	seedling	drought	PRJNA231241
SRR1544278	B_napus_001	B_napus	Brassicaceae	leaf	healthy	PRJNA256233
SRR1549533	B_napus_002	B_napus	Brassicaceae	leaf	drought	PRJNA256233
SRR1549534	B_napus_003	B_napus	Brassicaceae	root	healthy	PRJNA256233
SRR1549535	B_napus_004	B_napus	Brassicaceae	root	drought	PRJNA256233
SRR11412368	B_napus_005	B_napus	Brassicaceae	leaf	drought	PRJNA615051
SRR11412441	B_napus_005	B_napus	Brassicaceae	leaf	drought	PRJNA615051
SRR11412576	B_napus_005	B_napus	Brassicaceae	leaf	drought	PRJNA615051
SRR11412369	B_napus_006	B_napus	Brassicaceae	leaf	drought	PRJNA615051
SRR11412453	B_napus_006	B_napus	Brassicaceae	leaf	drought	PRJNA615051
SRR11412577	B_napus_006	B_napus	Brassicaceae	leaf	drought	PRJNA615051
SRR11412567	B_napus_007	B_napus	Brassicaceae	leaf	healthy	PRJNA615051
SRR11412587	B_napus_007	B_napus	Brassicaceae	leaf	healthy	PRJNA615051
SRR11412593	B_napus_007	B_napus	Brassicaceae	leaf	healthy	PRJNA615051
SRR11412568	B_napus_008	B_napus	Brassicaceae	leaf	healthy	PRJNA615051
SRR11412588	B_napus_008	B_napus	Brassicaceae	leaf	healthy	PRJNA615051
SRR11412595	B_napus_008	B_napus	Brassicaceae	leaf	healthy	PRJNA615051
SRR10065360	B_napus_009	B_napus	Brassicaceae	leaf	salt	PRJNA558913
SRR10065361	B_napus_009	B_napus	Brassicaceae	leaf	salt	PRJNA558913
SRR10065362	B_napus_010	B_napus	Brassicaceae	leaf	healthy	PRJNA558913
SRR10065363	B_napus_011	B_napus	Brassicaceae	leaf	healthy	PRJNA558913
SRR8352634	B_napus_12	B_napus	Brassicaceae	seed	healthy	PRJNA510462
SRR8352633	B_napus_12	B_napus	Brassicaceae	seed	healthy	PRJNA510462
SRR8352635	B_napus_12	B_napus	Brassicaceae	seed	healthy	PRJNA510462
SRR8352640	B_napus_13	B_napus	Brassicaceae	seed	healthy	PRJNA510462
SRR8352639	B_napus_13	B_napus	Brassicaceae	seed	healthy	PRJNA510462
SRR8352642	B_napus_13	B_napus	Brassicaceae	seed	healthy	PRJNA510462
SRR8352626	B_napus_14	B_napus	Brassicaceae	seed	healthy	PRJNA510462
SRR8352625	B_napus_14	B_napus	Brassicaceae	seed	healthy	PRJNA510462
SRR8352632	B_napus_14	B_napus	Brassicaceae	seed	healthy	PRJNA510462
SRR630923	B_oleracea_1	B_oleracea	Brassicaceae	flower	healthy	PRJNA183713
SRR630924	B_oleracea_2	B_oleracea	Brassicaceae	leaf	healthy	PRJNA183713
SRR630925	B_oleracea_3	B_oleracea	Brassicaceae	root	healthy	PRJNA183713
SRR630926	B_oleracea_4	B_oleracea	Brassicaceae	fruit	healthy	PRJNA183713
SRR630927	B_oleracea_5	B_oleracea	Brassicaceae	stem	healthy	PRJNA183713
SRR9865917	B_rapa_001	B_rapa	Brassicaceae	leaf	healthy	NA
SRR9865918	B_rapa_001	B_rapa	Brassicaceae	leaf	healthy	NA
SRR9865915	B_rapa_001	B_rapa	Brassicaceae	leaf	healthy	NA
SRR8692572	C_annuum_001	C_annuum	Solanaceae	leaf	cold	PRJNA525913
SRR8692573	C_annuum_001	C_annuum	Solanaceae	leaf	cold	PRJNA525913
SRR8692574	C_annuum_001	C_annuum	Solanaceae	leaf	cold	PRJNA525913
SRR8692575	C_annuum_002	C_annuum	Solanaceae	leaf	cold	PRJNA525913
SRR8692576	C_annuum_002	C_annuum	Solanaceae	leaf	cold	PRJNA525913
SRR8692577	C_annuum_002	C_annuum	Solanaceae	leaf	cold	PRJNA525913
SRR8692568	C_annuum_003	C_annuum	Solanaceae	leaf	cold	PRJNA525913
SRR8692591	C_annuum_003	C_annuum	Solanaceae	leaf	cold	PRJNA525913
SRR8692592	C_annuum_003	C_annuum	Solanaceae	leaf	cold	PRJNA525913
SRR8692569	C_annuum_004	C_annuum	Solanaceae	leaf	cold	PRJNA525913
SRR8692570	C_annuum_004	C_annuum	Solanaceae	leaf	cold	PRJNA525913
SRR8692571	C_annuum_004	C_annuum	Solanaceae	leaf	cold	PRJNA525913
SRR8692608	C_annuum_005	C_annuum	Solanaceae	leaf	cold	PRJNA525913
SRR8692609	C_annuum_005	C_annuum	Solanaceae	leaf	cold	PRJNA525913
SRR8692610	C_annuum_005	C_annuum	Solanaceae	leaf	cold	PRJNA525913
SRR8692613	C_annuum_006	C_annuum	Solanaceae	leaf	heat	PRJNA525913
SRR8692633	C_annuum_006	C_annuum	Solanaceae	leaf	heat	PRJNA525913
SRR8692634	C_annuum_006	C_annuum	Solanaceae	leaf	heat	PRJNA525913
SRR8692631	C_annuum_007	C_annuum	Solanaceae	leaf	heat	PRJNA525913
SRR8692632	C_annuum_007	C_annuum	Solanaceae	leaf	heat	PRJNA525913
SRR8692637	C_annuum_007	C_annuum	Solanaceae	leaf	heat	PRJNA525913
SRR8692605	C_annuum_008	C_annuum	Solanaceae	leaf	heat	PRJNA525913
SRR8692606	C_annuum_008	C_annuum	Solanaceae	leaf	heat	PRJNA525913
SRR8692607	C_annuum_008	C_annuum	Solanaceae	leaf	heat	PRJNA525913
SRR8692603	C_annuum_009	C_annuum	Solanaceae	leaf	heat	PRJNA525913
SRR8692604	C_annuum_009	C_annuum	Solanaceae	leaf	heat	PRJNA525913
SRR8692614	C_annuum_009	C_annuum	Solanaceae	leaf	heat	PRJNA525913
SRR8692635	C_annuum_010	C_annuum	Solanaceae	leaf	heat	PRJNA525913
SRR8692636	C_annuum_010	C_annuum	Solanaceae	leaf	heat	PRJNA525913
SRR8692638	C_annuum_010	C_annuum	Solanaceae	leaf	heat	PRJNA525913
SRR8692578	C_annuum_011	C_annuum	Solanaceae	leaf	other	PRJNA525913
SRR8692585	C_annuum_011	C_annuum	Solanaceae	leaf	other	PRJNA525913
SRR8692640	C_annuum_011	C_annuum	Solanaceae	leaf	other	PRJNA525913
SRR8692581	C_annuum_012	C_annuum	Solanaceae	leaf	other	PRJNA525913
SRR8692615	C_annuum_012	C_annuum	Solanaceae	leaf	other	PRJNA525913
SRR8692630	C_annuum_012	C_annuum	Solanaceae	leaf	other	PRJNA525913
SRR8692582	C_annuum_013	C_annuum	Solanaceae	leaf	other	PRJNA525913
SRR8692584	C_annuum_013	C_annuum	Solanaceae	leaf	other	PRJNA525913
SRR8692626	C_annuum_013	C_annuum	Solanaceae	leaf	other	PRJNA525913
SRR8692586	C_annuum_014	C_annuum	Solanaceae	leaf	other	PRJNA525913
SRR8692612	C_annuum_014	C_annuum	Solanaceae	leaf	other	PRJNA525913
SRR8692643	C_annuum_014	C_annuum	Solanaceae	leaf	other	PRJNA525913
SRR8692583	C_annuum_015	C_annuum	Solanaceae	leaf	other	PRJNA525913
SRR8692628	C_annuum_015	C_annuum	Solanaceae	leaf	other	PRJNA525913
SRR8692639	C_annuum_015	C_annuum	Solanaceae	leaf	other	PRJNA525913
SRR8692623	C_annuum_016	C_annuum	Solanaceae	leaf	healthy	PRJNA525913
SRR8692624	C_annuum_016	C_annuum	Solanaceae	leaf	healthy	PRJNA525913
SRR8692625	C_annuum_016	C_annuum	Solanaceae	leaf	healthy	PRJNA525913
SRR8692599	C_annuum_017	C_annuum	Solanaceae	leaf	healthy	PRJNA525913
SRR8692600	C_annuum_017	C_annuum	Solanaceae	leaf	healthy	PRJNA525913
SRR8692629	C_annuum_017	C_annuum	Solanaceae	leaf	healthy	PRJNA525913
SRR8692596	C_annuum_018	C_annuum	Solanaceae	leaf	healthy	PRJNA525913
SRR8692601	C_annuum_018	C_annuum	Solanaceae	leaf	healthy	PRJNA525913
SRR8692602	C_annuum_018	C_annuum	Solanaceae	leaf	healthy	PRJNA525913
SRR8692620	C_annuum_019	C_annuum	Solanaceae	leaf	healthy	PRJNA525913
SRR8692621	C_annuum_019	C_annuum	Solanaceae	leaf	healthy	PRJNA525913
SRR8692622	C_annuum_019	C_annuum	Solanaceae	leaf	healthy	PRJNA525913
SRR8692580	C_annuum_020	C_annuum	Solanaceae	leaf	healthy	PRJNA525913
SRR8692618	C_annuum_020	C_annuum	Solanaceae	leaf	healthy	PRJNA525913
SRR8692619	C_annuum_020	C_annuum	Solanaceae	leaf	healthy	PRJNA525913
SRR8692595	C_annuum_021	C_annuum	Solanaceae	leaf	healthy	PRJNA525913
SRR8692597	C_annuum_021	C_annuum	Solanaceae	leaf	healthy	PRJNA525913
SRR8692598	C_annuum_021	C_annuum	Solanaceae	leaf	healthy	PRJNA525913
SRR8692579	C_annuum_022	C_annuum	Solanaceae	leaf	salt	PRJNA525913
SRR8692594	C_annuum_022	C_annuum	Solanaceae	leaf	salt	PRJNA525913
SRR8692644	C_annuum_022	C_annuum	Solanaceae	leaf	salt	PRJNA525913
SRR8692593	C_annuum_023	C_annuum	Solanaceae	leaf	salt	PRJNA525913
SRR8692616	C_annuum_023	C_annuum	Solanaceae	leaf	salt	PRJNA525913
SRR8692617	C_annuum_023	C_annuum	Solanaceae	leaf	salt	PRJNA525913
SRR8692588	C_annuum_024	C_annuum	Solanaceae	leaf	salt	PRJNA525913
SRR8692641	C_annuum_024	C_annuum	Solanaceae	leaf	salt	PRJNA525913
SRR8692642	C_annuum_024	C_annuum	Solanaceae	leaf	salt	PRJNA525913
SRR8692587	C_annuum_025	C_annuum	Solanaceae	leaf	salt	PRJNA525913
SRR8692589	C_annuum_025	C_annuum	Solanaceae	leaf	salt	PRJNA525913
SRR8692590	C_annuum_025	C_annuum	Solanaceae	leaf	salt	PRJNA525913
SRR8692611	C_annuum_026	C_annuum	Solanaceae	leaf	salt	PRJNA525913
SRR8692627	C_annuum_026	C_annuum	Solanaceae	leaf	salt	PRJNA525913
SRR8692645	C_annuum_026	C_annuum	Solanaceae	leaf	salt	PRJNA525913
SRR6122660	C_annuum_027	C_annuum	Solanaceae	leaf	healthy	PRJNA223222
SRR6122661	C_annuum_027	C_annuum	Solanaceae	leaf	healthy	PRJNA223222
SRR6122676	C_annuum_028	C_annuum	Solanaceae	leaf	healthy	PRJNA223222
SRR6122677	C_annuum_028	C_annuum	Solanaceae	leaf	healthy	PRJNA223222
SRR6122682	C_annuum_028	C_annuum	Solanaceae	leaf	healthy	PRJNA223222
SRR6122666	C_annuum_029	C_annuum	Solanaceae	leaf	healthy	PRJNA223222
SRR6122668	C_annuum_029	C_annuum	Solanaceae	leaf	healthy	PRJNA223222
SRR6122669	C_annuum_029	C_annuum	Solanaceae	leaf	healthy	PRJNA223222
SRR6122670	C_annuum_030	C_annuum	Solanaceae	leaf	healthy	PRJNA223222
SRR6122671	C_annuum_030	C_annuum	Solanaceae	leaf	healthy	PRJNA223222
SRR6122673	C_annuum_030	C_annuum	Solanaceae	leaf	healthy	PRJNA223222
SRR6122664	C_annuum_031	C_annuum	Solanaceae	leaf	healthy	PRJNA223222
SRR6122665	C_annuum_031	C_annuum	Solanaceae	leaf	healthy	PRJNA223222
SRR6122672	C_annuum_031	C_annuum	Solanaceae	leaf	healthy	PRJNA223222
SRR6122680	C_annuum_032	C_annuum	Solanaceae	leaf	healthy	PRJNA223222
SRR6122681	C_annuum_032	C_annuum	Solanaceae	leaf	healthy	PRJNA223222
SRR6122683	C_annuum_032	C_annuum	Solanaceae	leaf	healthy	PRJNA223222
SRR6122667	C_annuum_033	C_annuum	Solanaceae	leaf	healthy	PRJNA223222
SRR6122674	C_annuum_033	C_annuum	Solanaceae	leaf	healthy	PRJNA223222
SRR6122675	C_annuum_033	C_annuum	Solanaceae	leaf	healthy	PRJNA223222
SRR6122688	C_annuum_034	C_annuum	Solanaceae	fruit	healthy	PRJNA223222
SRR6122689	C_annuum_034	C_annuum	Solanaceae	fruit	healthy	PRJNA223222
SRR6122690	C_annuum_034	C_annuum	Solanaceae	fruit	healthy	PRJNA223222
SRR6122678	C_annuum_035	C_annuum	Solanaceae	fruit	healthy	PRJNA223222
SRR6122679	C_annuum_035	C_annuum	Solanaceae	fruit	healthy	PRJNA223222
SRR6122684	C_annuum_035	C_annuum	Solanaceae	fruit	healthy	PRJNA223222
SRR6122685	C_annuum_036	C_annuum	Solanaceae	fruit	healthy	PRJNA223222
SRR6122686	C_annuum_036	C_annuum	Solanaceae	fruit	healthy	PRJNA223222
SRR6122687	C_annuum_036	C_annuum	Solanaceae	fruit	healthy	PRJNA223222
SRR6122691	C_annuum_037	C_annuum	Solanaceae	fruit	healthy	PRJNA223222
SRR6122692	C_annuum_037	C_annuum	Solanaceae	fruit	healthy	PRJNA223222
SRR6122693	C_annuum_037	C_annuum	Solanaceae	fruit	healthy	PRJNA223222
SRR6122611	C_annuum_038	C_annuum	Solanaceae	fruit	healthy	PRJNA223222
SRR6122612	C_annuum_038	C_annuum	Solanaceae	fruit	healthy	PRJNA223222
SRR6122613	C_annuum_038	C_annuum	Solanaceae	fruit	healthy	PRJNA223222
SRR6122614	C_annuum_039	C_annuum	Solanaceae	fruit	healthy	PRJNA223222
SRR6122615	C_annuum_039	C_annuum	Solanaceae	fruit	healthy	PRJNA223222
SRR6122616	C_annuum_039	C_annuum	Solanaceae	fruit	healthy	PRJNA223222
SRR6122608	C_annuum_040	C_annuum	Solanaceae	fruit	healthy	PRJNA223222
SRR6122609	C_annuum_040	C_annuum	Solanaceae	fruit	healthy	PRJNA223222
SRR6122617	C_annuum_040	C_annuum	Solanaceae	fruit	healthy	PRJNA223222
SRR6122619	C_annuum_041	C_annuum	Solanaceae	fruit	healthy	PRJNA223222
SRR6122624	C_annuum_041	C_annuum	Solanaceae	fruit	healthy	PRJNA223222
SRR6122625	C_annuum_041	C_annuum	Solanaceae	fruit	healthy	PRJNA223222
SRR6122610	C_annuum_042	C_annuum	Solanaceae	fruit	healthy	PRJNA223222
SRR6122626	C_annuum_042	C_annuum	Solanaceae	fruit	healthy	PRJNA223222
SRR6122627	C_annuum_042	C_annuum	Solanaceae	fruit	healthy	PRJNA223222
SRR6122618	C_annuum_043	C_annuum	Solanaceae	fruit	healthy	PRJNA223222
SRR6122620	C_annuum_043	C_annuum	Solanaceae	fruit	healthy	PRJNA223222
SRR6122621	C_annuum_043	C_annuum	Solanaceae	fruit	healthy	PRJNA223222
SRR6122622	C_annuum_044	C_annuum	Solanaceae	fruit	healthy	PRJNA223222
SRR6122623	C_annuum_044	C_annuum	Solanaceae	fruit	healthy	PRJNA223222
SRR6122694	C_annuum_044	C_annuum	Solanaceae	fruit	healthy	PRJNA223222
SRR6122701	C_annuum_045	C_annuum	Solanaceae	fruit	healthy	PRJNA223222
SRR6122702	C_annuum_045	C_annuum	Solanaceae	fruit	healthy	PRJNA223222
SRR6122703	C_annuum_045	C_annuum	Solanaceae	fruit	healthy	PRJNA223222
SRR6122698	C_annuum_046	C_annuum	Solanaceae	fruit	healthy	PRJNA223222
SRR6122699	C_annuum_046	C_annuum	Solanaceae	fruit	healthy	PRJNA223222
SRR6122700	C_annuum_046	C_annuum	Solanaceae	fruit	healthy	PRJNA223222
SRR6122695	C_annuum_047	C_annuum	Solanaceae	fruit	healthy	PRJNA223222
SRR6122696	C_annuum_047	C_annuum	Solanaceae	fruit	healthy	PRJNA223222
SRR6122697	C_annuum_047	C_annuum	Solanaceae	fruit	healthy	PRJNA223222
SRR771931	C_annuum_048	C_annuum	Solanaceae	stem	healthy	PRJNA193077
SRR771940	C_annuum_049	C_annuum	Solanaceae	root	healthy	PRJNA193077
SRR771924	C_annuum_050	C_annuum	Solanaceae	stem	healthy	PRJNA193077
SRR8549397	C_annuum_051	C_annuum	Solanaceae	flower	healthy	PRJNA223222
SRR8549398	C_annuum_051	C_annuum	Solanaceae	flower	healthy	PRJNA223222
SRR771942	C_annuum_052	C_annuum	Solanaceae	fruit	healthy	PRJNA193077
SRR771934	C_annuum_053	C_annuum	Solanaceae	fruit	healthy	PRJNA193077
SRR771951	C_annuum_054	C_annuum	Solanaceae	fruit	healthy	PRJNA193077
SRR771941	C_annuum_055	C_annuum	Solanaceae	fruit	healthy	PRJNA193077
SRR771933	C_annuum_056	C_annuum	Solanaceae	fruit	healthy	PRJNA193077
SRR771935	C_annuum_057	C_annuum	Solanaceae	fruit	healthy	PRJNA193077
SRR771936	C_annuum_058	C_annuum	Solanaceae	fruit	healthy	PRJNA193077
SRR771943	C_annuum_059	C_annuum	Solanaceae	fruit	healthy	PRJNA193077
SRR771929	C_annuum_060	C_annuum	Solanaceae	fruit	healthy	PRJNA193077
SRR771944	C_annuum_061	C_annuum	Solanaceae	fruit	healthy	PRJNA193077
SRR771945	C_annuum_062	C_annuum	Solanaceae	fruit	healthy	PRJNA193077
SRR771946	C_annuum_063	C_annuum	Solanaceae	fruit	healthy	PRJNA193077
SRR771953	C_annuum_064	C_annuum	Solanaceae	fruit	healthy	PRJNA193077
SRR771952	C_annuum_065	C_annuum	Solanaceae	fruit	healthy	PRJNA193077
SRR771954	C_annuum_066	C_annuum	Solanaceae	fruit	healthy	PRJNA193077
SRR771956	C_annuum_067	C_annuum	Solanaceae	fruit	healthy	PRJNA193077
SRR771955	C_annuum_068	C_annuum	Solanaceae	fruit	healthy	PRJNA193077
SRR771947	C_annuum_069	C_annuum	Solanaceae	fruit	healthy	PRJNA193077
SRR771938	C_annuum_070	C_annuum	Solanaceae	fruit	healthy	PRJNA193077
SRR771948	C_annuum_071	C_annuum	Solanaceae	fruit	healthy	PRJNA193077
SRR771939	C_annuum_072	C_annuum	Solanaceae	fruit	healthy	PRJNA193077
SRR771925	C_annuum_073	C_annuum	Solanaceae	leaf	healthy	PRJNA193077
SRR771928	C_annuum_074	C_annuum	Solanaceae	flower	healthy	PRJNA193077
SRR771927	C_annuum_075	C_annuum	Solanaceae	leaf	healthy	PRJNA193077
SRR771932	C_annuum_076	C_annuum	Solanaceae	flower	healthy	PRJNA193077
SRR8549402	C_annuum_077	C_annuum	Solanaceae	root	healthy	PRJNA223222
SRR8549403	C_annuum_077	C_annuum	Solanaceae	root	healthy	PRJNA223222
SRR8549404	C_annuum_077	C_annuum	Solanaceae	root	healthy	PRJNA223222
SRR8549399	C_annuum_078	C_annuum	Solanaceae	stem	healthy	PRJNA223222
SRR8549400	C_annuum_078	C_annuum	Solanaceae	stem	healthy	PRJNA223222
SRR8549401	C_annuum_078	C_annuum	Solanaceae	stem	healthy	PRJNA223222
SRR1066056	C_arietinum_001	C_arietinum	Fabaceae	root	cold	PRJNA232700
SRR1066057	C_arietinum_002	C_arietinum	Fabaceae	root	drought	PRJNA232700
SRR1066058	C_arietinum_003	C_arietinum	Fabaceae	root	salt	PRJNA232700
SRR1066059	C_arietinum_004	C_arietinum	Fabaceae	root	healthy	PRJNA232700
SRR1066060	C_arietinum_005	C_arietinum	Fabaceae	stem	cold	PRJNA232700
SRR1066061	C_arietinum_006	C_arietinum	Fabaceae	stem	drought	PRJNA232700
SRR1066062	C_arietinum_007	C_arietinum	Fabaceae	stem	salt	PRJNA232700
SRR1066063	C_arietinum_008	C_arietinum	Fabaceae	stem	healthy	PRJNA232700
SRR8100113	C_baccatum_001	C_baccatum	Solanaceae	flower	healthy	PRJNA308879
SRR8100115	C_baccatum_001	C_baccatum	Solanaceae	flower	healthy	PRJNA308879
SRR8100093	C_baccatum_002	C_baccatum	Solanaceae	leaf	healthy	PRJNA308879
SRR8100094	C_baccatum_002	C_baccatum	Solanaceae	leaf	healthy	PRJNA308879
SRR8100095	C_baccatum_002	C_baccatum	Solanaceae	leaf	healthy	PRJNA308879
SRR8100099	C_baccatum_003	C_baccatum	Solanaceae	fruit	healthy	PRJNA308879
SRR8100100	C_baccatum_003	C_baccatum	Solanaceae	fruit	healthy	PRJNA308879
SRR8100111	C_baccatum_003	C_baccatum	Solanaceae	fruit	healthy	PRJNA308879
SRR8100105	C_baccatum_004	C_baccatum	Solanaceae	fruit	healthy	PRJNA308879
SRR8100106	C_baccatum_004	C_baccatum	Solanaceae	fruit	healthy	PRJNA308879
SRR8100112	C_baccatum_004	C_baccatum	Solanaceae	fruit	healthy	PRJNA308879
SRR8100103	C_baccatum_005	C_baccatum	Solanaceae	fruit	healthy	PRJNA308879
SRR8100104	C_baccatum_005	C_baccatum	Solanaceae	fruit	healthy	PRJNA308879
SRR8100109	C_baccatum_005	C_baccatum	Solanaceae	fruit	healthy	PRJNA308879
SRR8100107	C_baccatum_006	C_baccatum	Solanaceae	fruit	healthy	PRJNA308879
SRR8100108	C_baccatum_006	C_baccatum	Solanaceae	fruit	healthy	PRJNA308879
SRR8100110	C_baccatum_006	C_baccatum	Solanaceae	fruit	healthy	PRJNA308879
SRR8100096	C_baccatum_007	C_baccatum	Solanaceae	root	healthy	PRJNA308879
SRR8100097	C_baccatum_007	C_baccatum	Solanaceae	root	healthy	PRJNA308879
SRR8100098	C_baccatum_007	C_baccatum	Solanaceae	root	healthy	PRJNA308879
SRR8100101	C_baccatum_008	C_baccatum	Solanaceae	stem	healthy	PRJNA308879
SRR8100102	C_baccatum_008	C_baccatum	Solanaceae	stem	healthy	PRJNA308879
SRR8100114	C_baccatum_008	C_baccatum	Solanaceae	stem	healthy	PRJNA308879
SRR771937	C_chinense_001	C_chinense	Solanaceae	fruit	healthy	PRJNA193077
SRR8100089	C_chinense_002	C_chinense	Solanaceae	leaf	healthy	PRJNA331024
SRR8100090	C_chinense_002	C_chinense	Solanaceae	leaf	healthy	PRJNA331024
SRR8100092	C_chinense_002	C_chinense	Solanaceae	leaf	healthy	PRJNA331024
SRR771926	C_chinense_003	C_chinense	Solanaceae	leaf	healthy	PRJNA193077
SRR771930	C_chinense_004	C_chinense	Solanaceae	fruit	healthy	PRJNA193077
SRR8100074	C_chinense_005	C_chinense	Solanaceae	fruit	healthy	PRJNA331024
SRR8100087	C_chinense_005	C_chinense	Solanaceae	fruit	healthy	PRJNA331024
SRR8100088	C_chinense_005	C_chinense	Solanaceae	fruit	healthy	PRJNA331024
SRR8100073	C_chinense_006	C_chinense	Solanaceae	fruit	healthy	PRJNA331024
SRR8100079	C_chinense_006	C_chinense	Solanaceae	fruit	healthy	PRJNA331024
SRR8100080	C_chinense_006	C_chinense	Solanaceae	fruit	healthy	PRJNA331024
SRR8100076	C_chinense_007	C_chinense	Solanaceae	fruit	healthy	PRJNA331024
SRR8100081	C_chinense_007	C_chinense	Solanaceae	fruit	healthy	PRJNA331024
SRR8100082	C_chinense_007	C_chinense	Solanaceae	fruit	healthy	PRJNA331024
SRR8100075	C_chinense_008	C_chinense	Solanaceae	fruit	healthy	PRJNA331024
SRR8100077	C_chinense_008	C_chinense	Solanaceae	fruit	healthy	PRJNA331024
SRR8100078	C_chinense_008	C_chinense	Solanaceae	fruit	healthy	PRJNA331024
SRR8100085	C_chinense_009	C_chinense	Solanaceae	root	healthy	PRJNA331024
SRR8100086	C_chinense_009	C_chinense	Solanaceae	root	healthy	PRJNA331024
SRR8100091	C_chinense_009	C_chinense	Solanaceae	root	healthy	PRJNA331024
SRR771949	C_chinense_010	C_chinense	Solanaceae	root	healthy	PRJNA193077
SRR8100072	C_chinense_011	C_chinense	Solanaceae	stem	healthy	PRJNA331024
SRR8100083	C_chinense_011	C_chinense	Solanaceae	stem	healthy	PRJNA331024
SRR8100084	C_chinense_011	C_chinense	Solanaceae	stem	healthy	PRJNA331024
SRR771950	C_chinense_012	C_chinense	Solanaceae	stem	healthy	PRJNA193077
SRR8100069	C_chinense_013	C_chinense	Solanaceae	flower	healthy	PRJNA331024
SRR8100070	C_chinense_013	C_chinense	Solanaceae	flower	healthy	PRJNA331024
SRR8100071	C_chinense_013	C_chinense	Solanaceae	flower	healthy	PRJNA331024
SRR6389278	C_lanatus_001	C_lanatus	Cucurbitaceae	leaf	healthy	PRJNA422970
SRR6389279	C_lanatus_001	C_lanatus	Cucurbitaceae	leaf	healthy	PRJNA422970
SRR6389286	C_lanatus_001	C_lanatus	Cucurbitaceae	leaf	healthy	PRJNA422970
SRR6389280	C_lanatus_002	C_lanatus	Cucurbitaceae	root	nitrogen	PRJNA422970
SRR6389281	C_lanatus_002	C_lanatus	Cucurbitaceae	root	nitrogen	PRJNA422970
SRR6389288	C_lanatus_002	C_lanatus	Cucurbitaceae	root	nitrogen	PRJNA422970
SRR6389282	C_lanatus_003	C_lanatus	Cucurbitaceae	leaf	nitrogen	PRJNA422970
SRR6389283	C_lanatus_003	C_lanatus	Cucurbitaceae	leaf	nitrogen	PRJNA422970
SRR6389289	C_lanatus_003	C_lanatus	Cucurbitaceae	leaf	nitrogen	PRJNA422970
SRR6389284	C_lanatus_004	C_lanatus	Cucurbitaceae	root	healthy	PRJNA422970
SRR6389285	C_lanatus_004	C_lanatus	Cucurbitaceae	root	healthy	PRJNA422970
SRR6389287	C_lanatus_004	C_lanatus	Cucurbitaceae	root	healthy	PRJNA422970
SRR2033940	C_lanatus_005	C_lanatus	Cucurbitaceae	flower	healthy	PRJNA284484
SRR2033941	C_lanatus_006	C_lanatus	Cucurbitaceae	flower	healthy	PRJNA284484
SRR2033942	C_lanatus_007	C_lanatus	Cucurbitaceae	flower	healthy	PRJNA284484
SRR2033943	C_lanatus_008	C_lanatus	Cucurbitaceae	flower	healthy	PRJNA284484
SRR915982	C_lanatus_009	C_lanatus	Cucurbitaceae	root	healthy	PRJNA209092
SRR916132	C_lanatus_010	C_lanatus	Cucurbitaceae	root	other	PRJNA209092
SRR916133	C_lanatus_011	C_lanatus	Cucurbitaceae	root	healthy	PRJNA209092
SRR916135	C_lanatus_012	C_lanatus	Cucurbitaceae	root	other	PRJNA209092
SRR916156	C_lanatus_013	C_lanatus	Cucurbitaceae	root	healthy	PRJNA209092
SRR916184	C_lanatus_014	C_lanatus	Cucurbitaceae	root	other	PRJNA209092
SRR916185	C_lanatus_015	C_lanatus	Cucurbitaceae	root	healthy	PRJNA209092
SRR916186	C_lanatus_016	C_lanatus	Cucurbitaceae	root	other	PRJNA209092
SRR7075814	C_lanatus_017	C_lanatus	Cucurbitaceae	leaf	healthy	PRJNA454040
SRR7075815	C_lanatus_017	C_lanatus	Cucurbitaceae	leaf	healthy	PRJNA454040
SRR7075816	C_lanatus_018	C_lanatus	Cucurbitaceae	leaf	drought	PRJNA454040
SRR7075817	C_lanatus_018	C_lanatus	Cucurbitaceae	leaf	drought	PRJNA454040
SRR7075818	C_lanatus_019	C_lanatus	Cucurbitaceae	leaf	healthy	PRJNA454040
SRR7075819	C_lanatus_019	C_lanatus	Cucurbitaceae	leaf	healthy	PRJNA454040
SRR7075820	C_lanatus_020	C_lanatus	Cucurbitaceae	leaf	drought	PRJNA454040
SRR7075821	C_lanatus_020	C_lanatus	Cucurbitaceae	leaf	drought	PRJNA454040
SRR7075822	C_lanatus_021	C_lanatus	Cucurbitaceae	leaf	healthy	PRJNA454040
SRR7075823	C_lanatus_021	C_lanatus	Cucurbitaceae	leaf	healthy	PRJNA454040
SRR7075824	C_lanatus_022	C_lanatus	Cucurbitaceae	leaf	drought	PRJNA454040
SRR7075825	C_lanatus_022	C_lanatus	Cucurbitaceae	leaf	drought	PRJNA454040
SRR7075826	C_lanatus_023	C_lanatus	Cucurbitaceae	leaf	drought	PRJNA454040
SRR7075827	C_lanatus_023	C_lanatus	Cucurbitaceae	leaf	drought	PRJNA454040
SRR7075828	C_lanatus_024	C_lanatus	Cucurbitaceae	leaf	healthy	PRJNA454040
SRR7075829	C_lanatus_024	C_lanatus	Cucurbitaceae	leaf	healthy	PRJNA454040
SRR11040540	C_lanatus_025	C_lanatus	Cucurbitaceae	leaf	healthy	PRJNA604984
SRR11040541	C_lanatus_025	C_lanatus	Cucurbitaceae	leaf	healthy	PRJNA604984
SRR11040542	C_lanatus_025	C_lanatus	Cucurbitaceae	leaf	healthy	PRJNA604984
SRR11040543	C_lanatus_026	C_lanatus	Cucurbitaceae	leaf	drought	PRJNA604984
SRR11040544	C_lanatus_026	C_lanatus	Cucurbitaceae	leaf	drought	PRJNA604984
SRR11040545	C_lanatus_026	C_lanatus	Cucurbitaceae	leaf	drought	PRJNA604984
SRR8177409	C_lanatus_027	C_lanatus	Cucurbitaceae	flower	heat	PRJNA504354
SRR8177411	C_lanatus_027	C_lanatus	Cucurbitaceae	flower	heat	PRJNA504354
SRR8177412	C_lanatus_027	C_lanatus	Cucurbitaceae	flower	heat	PRJNA504354
SRR8177410	C_lanatus_028	C_lanatus	Cucurbitaceae	flower	heat	PRJNA504354
SRR8177425	C_lanatus_028	C_lanatus	Cucurbitaceae	flower	heat	PRJNA504354
SRR8177426	C_lanatus_028	C_lanatus	Cucurbitaceae	flower	heat	PRJNA504354
SRR8177413	C_lanatus_029	C_lanatus	Cucurbitaceae	flower	healthy	PRJNA504354
SRR8177414	C_lanatus_029	C_lanatus	Cucurbitaceae	flower	healthy	PRJNA504354
SRR8177416	C_lanatus_029	C_lanatus	Cucurbitaceae	flower	healthy	PRJNA504354
SRR8177415	C_lanatus_030	C_lanatus	Cucurbitaceae	flower	healthy	PRJNA504354
SRR8177417	C_lanatus_030	C_lanatus	Cucurbitaceae	flower	healthy	PRJNA504354
SRR8177418	C_lanatus_030	C_lanatus	Cucurbitaceae	flower	healthy	PRJNA504354
SRR8177419	C_lanatus_031	C_lanatus	Cucurbitaceae	flower	heat	PRJNA504354
SRR8177420	C_lanatus_031	C_lanatus	Cucurbitaceae	flower	heat	PRJNA504354
SRR8177422	C_lanatus_031	C_lanatus	Cucurbitaceae	flower	heat	PRJNA504354
SRR8177421	C_lanatus_032	C_lanatus	Cucurbitaceae	flower	heat	PRJNA504354
SRR8177423	C_lanatus_032	C_lanatus	Cucurbitaceae	flower	heat	PRJNA504354
SRR8177424	C_lanatus_032	C_lanatus	Cucurbitaceae	flower	heat	PRJNA504354
SRR8528407	C_lanatus_033	C_lanatus	Cucurbitaceae	fruit	healthy	PRJNA520808
SRR8528408	C_lanatus_033	C_lanatus	Cucurbitaceae	fruit	healthy	PRJNA520808
SRR8528409	C_lanatus_034	C_lanatus	Cucurbitaceae	fruit	healthy	PRJNA520808
SRR8528410	C_lanatus_034	C_lanatus	Cucurbitaceae	fruit	healthy	PRJNA520808
SRR8528411	C_lanatus_035	C_lanatus	Cucurbitaceae	fruit	healthy	PRJNA520808
SRR8528412	C_lanatus_035	C_lanatus	Cucurbitaceae	fruit	healthy	PRJNA520808
SRR8528413	C_lanatus_036	C_lanatus	Cucurbitaceae	fruit	healthy	PRJNA520808
SRR8528414	C_lanatus_036	C_lanatus	Cucurbitaceae	fruit	healthy	PRJNA520808
SRR3535158	C_lanatus_037	C_lanatus	Cucurbitaceae	seed	healthy	PRJNA319011
SRR3535159	C_lanatus_037	C_lanatus	Cucurbitaceae	seed	healthy	PRJNA319011
SRR3535161	C_lanatus_037	C_lanatus	Cucurbitaceae	seed	healthy	PRJNA319011
SRR3535162	C_lanatus_038	C_lanatus	Cucurbitaceae	seed	healthy	PRJNA319011
SRR3535163	C_lanatus_038	C_lanatus	Cucurbitaceae	seed	healthy	PRJNA319011
SRR3535164	C_lanatus_038	C_lanatus	Cucurbitaceae	seed	healthy	PRJNA319011
SRR3535165	C_lanatus_039	C_lanatus	Cucurbitaceae	seed	healthy	PRJNA319011
SRR3535166	C_lanatus_039	C_lanatus	Cucurbitaceae	seed	healthy	PRJNA319011
SRR3535167	C_lanatus_039	C_lanatus	Cucurbitaceae	seed	healthy	PRJNA319011
SRR3535168	C_lanatus_040	C_lanatus	Cucurbitaceae	seed	healthy	PRJNA319011
SRR3535169	C_lanatus_040	C_lanatus	Cucurbitaceae	seed	healthy	PRJNA319011
SRR3535170	C_lanatus_040	C_lanatus	Cucurbitaceae	seed	healthy	PRJNA319011
SRR3156549	C_lanatus_041	C_lanatus	Cucurbitaceae	leaf	healthy	NA
SRR3156550	C_lanatus_041	C_lanatus	Cucurbitaceae	leaf	healthy	PRJNA307279
SRR3156551	C_lanatus_041	C_lanatus	Cucurbitaceae	leaf	healthy	PRJNA307279
SRR3156552	C_lanatus_041	C_lanatus	Cucurbitaceae	leaf	healthy	PRJNA307279
SRR3156553	C_lanatus_042	C_lanatus	Cucurbitaceae	root	healthy	PRJNA307279
SRR3156554	C_lanatus_042	C_lanatus	Cucurbitaceae	root	healthy	PRJNA307279
SRR3156555	C_lanatus_042	C_lanatus	Cucurbitaceae	root	healthy	PRJNA307279
SRR3156556	C_lanatus_042	C_lanatus	Cucurbitaceae	root	healthy	PRJNA307279
SRR3156557	C_lanatus_043	C_lanatus	Cucurbitaceae	stem	healthy	PRJNA307279
SRR3156558	C_lanatus_043	C_lanatus	Cucurbitaceae	stem	healthy	PRJNA307279
SRR3156559	C_lanatus_043	C_lanatus	Cucurbitaceae	stem	healthy	PRJNA307279
SRR3156560	C_lanatus_043	C_lanatus	Cucurbitaceae	stem	healthy	PRJNA307279
SRR3156561	C_lanatus_044	C_lanatus	Cucurbitaceae	leaf	phosphorus	PRJNA307279
SRR3156562	C_lanatus_044	C_lanatus	Cucurbitaceae	leaf	phosphorus	PRJNA307279
SRR3156563	C_lanatus_044	C_lanatus	Cucurbitaceae	leaf	phosphorus	PRJNA307279
SRR3156564	C_lanatus_044	C_lanatus	Cucurbitaceae	leaf	phosphorus	PRJNA307279
SRR3156565	C_lanatus_045	C_lanatus	Cucurbitaceae	root	phosphorus	PRJNA307279
SRR3156566	C_lanatus_045	C_lanatus	Cucurbitaceae	root	phosphorus	PRJNA307279
SRR3156567	C_lanatus_045	C_lanatus	Cucurbitaceae	root	phosphorus	PRJNA307279
SRR3156568	C_lanatus_045	C_lanatus	Cucurbitaceae	root	phosphorus	PRJNA307279
SRR3156569	C_lanatus_046	C_lanatus	Cucurbitaceae	stem	phosphorus	PRJNA307279
SRR3156570	C_lanatus_046	C_lanatus	Cucurbitaceae	stem	phosphorus	PRJNA307279
SRR3156571	C_lanatus_046	C_lanatus	Cucurbitaceae	stem	phosphorus	PRJNA307279
SRR3156572	C_lanatus_046	C_lanatus	Cucurbitaceae	stem	phosphorus	PRJNA307279
SRR5658201	C_lanatus_047	C_lanatus	Cucurbitaceae	fruit	healthy	PRJNA389184
SRR5658202	C_lanatus_047	C_lanatus	Cucurbitaceae	fruit	healthy	PRJNA389184
SRR5658203	C_lanatus_048	C_lanatus	Cucurbitaceae	fruit	biotic	PRJNA389184
SRR5658204	C_lanatus_048	C_lanatus	Cucurbitaceae	fruit	biotic	PRJNA389184
SRR7138068	C_maxima_001	C_maxima	Cucurbitaceae	leaf	salt	PRJNA464060
SRR7138082	C_maxima_001	C_maxima	Cucurbitaceae	leaf	salt	PRJNA464060
SRR7138083	C_maxima_001	C_maxima	Cucurbitaceae	leaf	salt	PRJNA464060
SRR7138069	C_maxima_002	C_maxima	Cucurbitaceae	leaf	salt	PRJNA464060
SRR7138070	C_maxima_002	C_maxima	Cucurbitaceae	leaf	salt	PRJNA464060
SRR7138071	C_maxima_002	C_maxima	Cucurbitaceae	leaf	salt	PRJNA464060
SRR7138084	C_maxima_003	C_maxima	Cucurbitaceae	leaf	healthy	PRJNA464060
SRR7138086	C_maxima_003	C_maxima	Cucurbitaceae	leaf	healthy	PRJNA464060
SRR7138087	C_maxima_003	C_maxima	Cucurbitaceae	leaf	healthy	PRJNA464060
SRR7138085	C_maxima_004	C_maxima	Cucurbitaceae	leaf	healthy	PRJNA464060
SRR7138090	C_maxima_004	C_maxima	Cucurbitaceae	leaf	healthy	PRJNA464060
SRR7138091	C_maxima_004	C_maxima	Cucurbitaceae	leaf	healthy	PRJNA464060
SRR13364283	C_maxima_005	C_maxima	Cucurbitaceae	leaf	cold	PRJNA689711
SRR13364284	C_maxima_005	C_maxima	Cucurbitaceae	leaf	cold	PRJNA689711
SRR13364285	C_maxima_005	C_maxima	Cucurbitaceae	leaf	cold	PRJNA689711
SRR13364286	C_maxima_006	C_maxima	Cucurbitaceae	leaf	healthy	PRJNA689711
SRR13364287	C_maxima_006	C_maxima	Cucurbitaceae	leaf	healthy	PRJNA689711
SRR13364288	C_maxima_006	C_maxima	Cucurbitaceae	leaf	healthy	PRJNA689711
SRR5504353	C_maxima_007	C_maxima	Cucurbitaceae	root	healthy	PRJNA385310
SRR5504354	C_maxima_007	C_maxima	Cucurbitaceae	root	healthy	PRJNA385310
SRR5504355	C_maxima_007	C_maxima	Cucurbitaceae	root	healthy	PRJNA385310
SRR5504356	C_maxima_008	C_maxima	Cucurbitaceae	stem	healthy	PRJNA385310
SRR5504357	C_maxima_008	C_maxima	Cucurbitaceae	stem	healthy	PRJNA385310
SRR5504358	C_maxima_009	C_maxima	Cucurbitaceae	leaf	healthy	PRJNA385310
SRR5504359	C_maxima_009	C_maxima	Cucurbitaceae	leaf	healthy	PRJNA385310
SRR5504360	C_maxima_009	C_maxima	Cucurbitaceae	leaf	healthy	PRJNA385310
SRR5504361	C_maxima_010	C_maxima	Cucurbitaceae	fruit	healthy	PRJNA385310
SRR5504362	C_maxima_010	C_maxima	Cucurbitaceae	fruit	healthy	PRJNA385310
SRR5504363	C_maxima_010	C_maxima	Cucurbitaceae	fruit	healthy	PRJNA385310
SRR10966354	C_melo_001	C_melo	Cucurbitaceae	fruit	healthy	PRJNA603204
SRR10966355	C_melo_002	C_melo	Cucurbitaceae	fruit	healthy	PRJNA603204
SRR10966356	C_melo_003	C_melo	Cucurbitaceae	fruit	healthy	PRJNA603204
SRR10966357	C_melo_004	C_melo	Cucurbitaceae	fruit	healthy	PRJNA603204
SRR10966358	C_melo_005	C_melo	Cucurbitaceae	fruit	healthy	PRJNA603204
SRR10966359	C_melo_006	C_melo	Cucurbitaceae	root	healthy	PRJNA603204
SRR10966360	C_melo_007	C_melo	Cucurbitaceae	stem	healthy	PRJNA603204
SRR10966361	C_melo_008	C_melo	Cucurbitaceae	leaf	healthy	PRJNA603204
SRR10966362	C_melo_009	C_melo	Cucurbitaceae	flower	healthy	PRJNA603204
SRR10966363	C_melo_010	C_melo	Cucurbitaceae	stem	healthy	PRJNA603204
SRR10966364	C_melo_011	C_melo	Cucurbitaceae	fruit	healthy	PRJNA603204
SRR10966365	C_melo_012	C_melo	Cucurbitaceae	fruit	healthy	PRJNA603204
SRR10966366	C_melo_013	C_melo	Cucurbitaceae	fruit	healthy	PRJNA603204
SRR10966367	C_melo_014	C_melo	Cucurbitaceae	seed	healthy	PRJNA603204
SRR10966368	C_melo_015	C_melo	Cucurbitaceae	seed	healthy	PRJNA603204
DRR106503	C_melo_016	C_melo	Cucurbitaceae	other	healthy	PRJDB6414
DRR106504	C_melo_017	C_melo	Cucurbitaceae	fruit	healthy	PRJDB6414
DRR106505	C_melo_018	C_melo	Cucurbitaceae	fruit	healthy	PRJDB6414
DRR106506	C_melo_019	C_melo	Cucurbitaceae	fruit	healthy	PRJDB6414
DRR106507	C_melo_020	C_melo	Cucurbitaceae	fruit	healthy	PRJDB6414
DRR106508	C_melo_021	C_melo	Cucurbitaceae	fruit	healthy	PRJDB6414
DRR106509	C_melo_022	C_melo	Cucurbitaceae	fruit	healthy	PRJDB6414
DRR106510	C_melo_023	C_melo	Cucurbitaceae	fruit	healthy	PRJDB6414
DRR106511	C_melo_024	C_melo	Cucurbitaceae	fruit	healthy	PRJDB6414
DRR106512	C_melo_025	C_melo	Cucurbitaceae	fruit	healthy	PRJDB6414
DRR106513	C_melo_026	C_melo	Cucurbitaceae	fruit	healthy	PRJDB6414
DRR106514	C_melo_027	C_melo	Cucurbitaceae	fruit	healthy	PRJDB6414
DRR106515	C_melo_028	C_melo	Cucurbitaceae	fruit	healthy	PRJDB6414
DRR106516	C_melo_029	C_melo	Cucurbitaceae	fruit	healthy	PRJDB6414
DRR106517	C_melo_030	C_melo	Cucurbitaceae	fruit	healthy	PRJDB6414
DRR106518	C_melo_031	C_melo	Cucurbitaceae	fruit	healthy	PRJDB6414
DRR106519	C_melo_032	C_melo	Cucurbitaceae	fruit	healthy	PRJDB6414
DRR106520	C_melo_033	C_melo	Cucurbitaceae	seed	healthy	PRJDB6414
DRR106521	C_melo_034	C_melo	Cucurbitaceae	flower	healthy	PRJDB6414
DRR106522	C_melo_035	C_melo	Cucurbitaceae	flower	healthy	PRJDB6414
DRR106523	C_melo_036	C_melo	Cucurbitaceae	flower	healthy	PRJDB6414
DRR106524	C_melo_037	C_melo	Cucurbitaceae	leaf	healthy	PRJDB6414
DRR106525	C_melo_038	C_melo	Cucurbitaceae	leaf	healthy	PRJDB6414
DRR106526	C_melo_039	C_melo	Cucurbitaceae	leaf	healthy	PRJDB6414
DRR106527	C_melo_040	C_melo	Cucurbitaceae	flower	healthy	PRJDB6414
DRR106528	C_melo_041	C_melo	Cucurbitaceae	root	healthy	PRJDB6414
DRR106529	C_melo_042	C_melo	Cucurbitaceae	stem	healthy	PRJDB6414
DRR106530	C_melo_043	C_melo	Cucurbitaceae	stem	healthy	PRJDB6414
DRR106531	C_melo_044	C_melo	Cucurbitaceae	stem	healthy	PRJDB6414
DRR106532	C_melo_045	C_melo	Cucurbitaceae	leaf	healthy	PRJDB6414
ERR1662989	C_melo_046	C_melo	Cucurbitaceae	stem	healthy	PRJEB15551
ERR1662990	C_melo_046	C_melo	Cucurbitaceae	stem	healthy	PRJEB15551
ERR1662991	C_melo_047	C_melo	Cucurbitaceae	stem	healthy	PRJEB15551
ERR1662992	C_melo_047	C_melo	Cucurbitaceae	stem	healthy	PRJEB15551
ERR1662993	C_melo_048	C_melo	Cucurbitaceae	stem	biotic	PRJEB15551
ERR1662994	C_melo_048	C_melo	Cucurbitaceae	stem	biotic	PRJEB15551
ERR1662995	C_melo_049	C_melo	Cucurbitaceae	stem	biotic	PRJEB15551
ERR1662996	C_melo_049	C_melo	Cucurbitaceae	stem	biotic	PRJEB15551
ERR1662997	C_melo_050	C_melo	Cucurbitaceae	stem	healthy	PRJEB15551
ERR1662998	C_melo_050	C_melo	Cucurbitaceae	stem	healthy	PRJEB15551
ERR1662999	C_melo_051	C_melo	Cucurbitaceae	stem	healthy	PRJEB15551
ERR1663000	C_melo_051	C_melo	Cucurbitaceae	stem	healthy	PRJEB15551
ERR1663001	C_melo_052	C_melo	Cucurbitaceae	stem	biotic	PRJEB15551
ERR1663002	C_melo_052	C_melo	Cucurbitaceae	stem	biotic	PRJEB15551
ERR1663003	C_melo_053	C_melo	Cucurbitaceae	stem	biotic	PRJEB15551
ERR1663004	C_melo_053	C_melo	Cucurbitaceae	stem	biotic	PRJEB15551
SRR5465679	C_melo_054	C_melo	Cucurbitaceae	flower	healthy	PRJNA383830
SRR5465681	C_melo_054	C_melo	Cucurbitaceae	flower	healthy	PRJNA383830
SRR5465682	C_melo_055	C_melo	Cucurbitaceae	flower	healthy	PRJNA383830
SRR5465684	C_melo_055	C_melo	Cucurbitaceae	flower	healthy	PRJNA383830
SRR5465686	C_melo_056	C_melo	Cucurbitaceae	root	healthy	PRJNA383830
SRR5465696	C_melo_056	C_melo	Cucurbitaceae	root	healthy	PRJNA383830
SRR5465688	C_melo_057	C_melo	Cucurbitaceae	fruit	healthy	PRJNA383830
SRR5465690	C_melo_057	C_melo	Cucurbitaceae	fruit	healthy	PRJNA383830
SRR5465692	C_melo_058	C_melo	Cucurbitaceae	leaf	healthy	PRJNA383830
SRR5465694	C_melo_058	C_melo	Cucurbitaceae	leaf	healthy	PRJNA383830
SRR9651393	C_melo_059	C_melo	Cucurbitaceae	leaf	cold	PRJNA553119
SRR9651400	C_melo_059	C_melo	Cucurbitaceae	leaf	cold	NA
SRR9651401	C_melo_059	C_melo	Cucurbitaceae	leaf	cold	NA
SRR9651394	C_melo_060	C_melo	Cucurbitaceae	leaf	cold	NA
SRR9651395	C_melo_060	C_melo	Cucurbitaceae	leaf	cold	NA
SRR9651396	C_melo_060	C_melo	Cucurbitaceae	leaf	cold	NA
SRR9651397	C_melo_061	C_melo	Cucurbitaceae	leaf	cold	NA
SRR9651398	C_melo_061	C_melo	Cucurbitaceae	leaf	cold	NA
SRR9651399	C_melo_061	C_melo	Cucurbitaceae	leaf	cold	NA
SRR2508879	C_melo_062	C_melo	Cucurbitaceae	leaf	healthy	PRJNA296827
SRR2508880	C_melo_063	C_melo	Cucurbitaceae	leaf	salt	PRJNA296827
SRR2508881	C_melo_064	C_melo	Cucurbitaceae	leaf	healthy	PRJNA296827
SRR2508882	C_melo_065	C_melo	Cucurbitaceae	leaf	salt	PRJNA296827
SRR6986536	C_melo_066	C_melo	Cucurbitaceae	leaf	healthy	PRJNA434538
SRR6986537	C_melo_066	C_melo	Cucurbitaceae	leaf	healthy	PRJNA434538
SRR6986539	C_melo_066	C_melo	Cucurbitaceae	leaf	healthy	PRJNA434538
SRR6986538	C_melo_067	C_melo	Cucurbitaceae	leaf	healthy	PRJNA434538
SRR6986540	C_melo_067	C_melo	Cucurbitaceae	leaf	healthy	PRJNA434538
SRR6986541	C_melo_067	C_melo	Cucurbitaceae	leaf	healthy	PRJNA434538
SRR6986542	C_melo_068	C_melo	Cucurbitaceae	leaf	healthy	PRJNA434538
SRR6986543	C_melo_068	C_melo	Cucurbitaceae	leaf	healthy	PRJNA434538
SRR6986545	C_melo_068	C_melo	Cucurbitaceae	leaf	healthy	PRJNA434538
SRR6986544	C_melo_069	C_melo	Cucurbitaceae	leaf	biotic	PRJNA434538
SRR6986548	C_melo_069	C_melo	Cucurbitaceae	leaf	biotic	PRJNA434538
SRR6986549	C_melo_069	C_melo	Cucurbitaceae	leaf	biotic	PRJNA434538
SRR6986546	C_melo_070	C_melo	Cucurbitaceae	leaf	biotic	PRJNA434538
SRR6986547	C_melo_070	C_melo	Cucurbitaceae	leaf	biotic	PRJNA434538
SRR6986553	C_melo_070	C_melo	Cucurbitaceae	leaf	biotic	PRJNA434538
SRR6986550	C_melo_071	C_melo	Cucurbitaceae	leaf	biotic	PRJNA434538
SRR6986551	C_melo_071	C_melo	Cucurbitaceae	leaf	biotic	PRJNA434538
SRR6986552	C_melo_071	C_melo	Cucurbitaceae	leaf	biotic	PRJNA434538
SRR11659065	C_moschata_001	C_moschata	Cucurbitaceae	fruit	healthy	PRJNA629657
SRR11659066	C_moschata_002	C_moschata	Cucurbitaceae	fruit	healthy	PRJNA629657
SRR11659067	C_moschata_003	C_moschata	Cucurbitaceae	fruit	healthy	PRJNA629657
SRR11659068	C_moschata_004	C_moschata	Cucurbitaceae	fruit	healthy	PRJNA629657
SRR11659069	C_moschata_005	C_moschata	Cucurbitaceae	fruit	healthy	PRJNA629657
SRR11659070	C_moschata_006	C_moschata	Cucurbitaceae	fruit	healthy	PRJNA629657
SRR11659071	C_moschata_007	C_moschata	Cucurbitaceae	fruit	healthy	PRJNA629657
SRR11659072	C_moschata_008	C_moschata	Cucurbitaceae	fruit	healthy	PRJNA629657
SRR11659073	C_moschata_009	C_moschata	Cucurbitaceae	fruit	healthy	PRJNA629657
SRR11659074	C_moschata_010	C_moschata	Cucurbitaceae	fruit	healthy	PRJNA629657
SRR9691130	C_moschata_011	C_moschata	Cucurbitaceae	flower	healthy	PRJNA554766
SRR9691131	C_moschata_012	C_moschata	Cucurbitaceae	flower	other	PRJNA554766
SRR9691132	C_moschata_013	C_moschata	Cucurbitaceae	flower	healthy	PRJNA554766
SRR9691133	C_moschata_014	C_moschata	Cucurbitaceae	flower	other	PRJNA554766
SRR9648343	C_moschata_015	C_moschata	Cucurbitaceae	leaf	healthy	PRJNA552914
SRR9648344	C_moschata_016	C_moschata	Cucurbitaceae	leaf	healthy	PRJNA552914
SRR9648345	C_moschata_017	C_moschata	Cucurbitaceae	leaf	healthy	PRJNA552914
SRR9648346	C_moschata_018	C_moschata	Cucurbitaceae	leaf	healthy	PRJNA552914
SRR9648347	C_moschata_019	C_moschata	Cucurbitaceae	leaf	healthy	PRJNA552914
SRR9648350	C_moschata_020	C_moschata	Cucurbitaceae	leaf	healthy	PRJNA552914
SRR9648351	C_moschata_021	C_moschata	Cucurbitaceae	leaf	healthy	PRJNA552914
SRR9648358	C_moschata_022	C_moschata	Cucurbitaceae	leaf	healthy	PRJNA552914
SRR9648359	C_moschata_023	C_moschata	Cucurbitaceae	leaf	healthy	PRJNA552914
SRR9648361	C_moschata_024	C_moschata	Cucurbitaceae	leaf	healthy	PRJNA552914
SRR9648362	C_moschata_025	C_moschata	Cucurbitaceae	leaf	healthy	PRJNA552914
SRR9648363	C_moschata_026	C_moschata	Cucurbitaceae	leaf	healthy	PRJNA552914
SRR7138072	C_moschata_027	C_moschata	Cucurbitaceae	leaf	salt	PRJNA464060
SRR7138073	C_moschata_027	C_moschata	Cucurbitaceae	leaf	salt	PRJNA464060
SRR7138081	C_moschata_027	C_moschata	Cucurbitaceae	leaf	salt	PRJNA464060
SRR7138074	C_moschata_028	C_moschata	Cucurbitaceae	leaf	healthy	PRJNA464060
SRR7138075	C_moschata_028	C_moschata	Cucurbitaceae	leaf	healthy	PRJNA464060
SRR7138076	C_moschata_028	C_moschata	Cucurbitaceae	leaf	healthy	PRJNA464060
SRR7138077	C_moschata_029	C_moschata	Cucurbitaceae	leaf	healthy	PRJNA464060
SRR7138078	C_moschata_029	C_moschata	Cucurbitaceae	leaf	healthy	PRJNA464060
SRR7138079	C_moschata_029	C_moschata	Cucurbitaceae	leaf	healthy	PRJNA464060
SRR7138080	C_moschata_030	C_moschata	Cucurbitaceae	leaf	salt	PRJNA464060
SRR7138088	C_moschata_030	C_moschata	Cucurbitaceae	leaf	salt	PRJNA464060
SRR7138089	C_moschata_030	C_moschata	Cucurbitaceae	leaf	salt	PRJNA464060
SRR6821832	C_moschata_031	C_moschata	Cucurbitaceae	root	salt	PRJNA437579
SRR6821833	C_moschata_031	C_moschata	Cucurbitaceae	root	salt	PRJNA437579
SRR6821834	C_moschata_031	C_moschata	Cucurbitaceae	root	salt	PRJNA437579
SRR6821838	C_moschata_032	C_moschata	Cucurbitaceae	root	healthy	PRJNA437579
SRR6821839	C_moschata_032	C_moschata	Cucurbitaceae	root	healthy	PRJNA437579
SRR6821840	C_moschata_032	C_moschata	Cucurbitaceae	root	healthy	PRJNA437579
SRR5504342	C_moschata_033	C_moschata	Cucurbitaceae	root	healthy	PRJNA385310
SRR5504343	C_moschata_033	C_moschata	Cucurbitaceae	root	healthy	PRJNA385310
SRR5504344	C_moschata_033	C_moschata	Cucurbitaceae	root	healthy	PRJNA385310
SRR5504345	C_moschata_034	C_moschata	Cucurbitaceae	stem	healthy	PRJNA385310
SRR5504346	C_moschata_034	C_moschata	Cucurbitaceae	stem	healthy	PRJNA385310
SRR5504347	C_moschata_034	C_moschata	Cucurbitaceae	stem	healthy	PRJNA385310
SRR5504348	C_moschata_035	C_moschata	Cucurbitaceae	leaf	healthy	PRJNA385310
SRR5504349	C_moschata_035	C_moschata	Cucurbitaceae	leaf	healthy	PRJNA385310
SRR5504350	C_moschata_035	C_moschata	Cucurbitaceae	fruit	healthy	PRJNA385310
SRR5504351	C_moschata_036	C_moschata	Cucurbitaceae	fruit	healthy	PRJNA385310
SRR5504352	C_moschata_036	C_moschata	Cucurbitaceae	fruit	healthy	NA
SRR12828719	C_pepo_001	C_pepo	Cucurbitaceae	leaf	biotic	PRJNA669995
SRR12828720	C_pepo_001	C_pepo	Cucurbitaceae	leaf	biotic	PRJNA669995
SRR12828721	C_pepo_001	C_pepo	Cucurbitaceae	leaf	biotic	PRJNA669995
SRR12828722	C_pepo_002	C_pepo	Cucurbitaceae	leaf	biotic	PRJNA669995
SRR12828723	C_pepo_002	C_pepo	Cucurbitaceae	leaf	biotic	PRJNA669995
SRR12828724	C_pepo_002	C_pepo	Cucurbitaceae	leaf	biotic	PRJNA669995
SRR8132885	C_pepo_003	C_pepo	Cucurbitaceae	fruit	healthy	PRJNA499783
SRR8132886	C_pepo_004	C_pepo	Cucurbitaceae	fruit	healthy	PRJNA499783
SRR8132887	C_pepo_005	C_pepo	Cucurbitaceae	fruit	other	PRJNA499783
SRR8132888	C_pepo_006	C_pepo	Cucurbitaceae	fruit	healthy	PRJNA499783
SRR8132889	C_pepo_007	C_pepo	Cucurbitaceae	fruit	healthy	PRJNA499783
SRR8132890	C_pepo_008	C_pepo	Cucurbitaceae	fruit	other	PRJNA499783
SRR5883139	C_pepo_009	C_pepo	Cucurbitaceae	leaf	healthy	PRJNA396465
SRR5883140	C_pepo_009	C_pepo	Cucurbitaceae	leaf	healthy	PRJNA396465
SRR5883141	C_pepo_009	C_pepo	Cucurbitaceae	leaf	healthy	PRJNA396465
SRR5682044	C_pepo_010	C_pepo	Cucurbitaceae	leaf	healthy	PRJNA386743
SRR5682047	C_pepo_011	C_pepo	Cucurbitaceae	leaf	healthy	PRJNA386743
SRR6868816	C_pepo_012	C_pepo	Cucurbitaceae	leaf	healthy	PRJNA439198
SRR6868824	C_pepo_012	C_pepo	Cucurbitaceae	leaf	healthy	PRJNA439198
SRR6868829	C_pepo_012	C_pepo	Cucurbitaceae	leaf	healthy	PRJNA439198
SRR6868817	C_pepo_013	C_pepo	Cucurbitaceae	leaf	biotic	PRJNA439198
SRR6868819	C_pepo_013	C_pepo	Cucurbitaceae	leaf	biotic	PRJNA439198
SRR6868823	C_pepo_013	C_pepo	Cucurbitaceae	leaf	biotic	PRJNA439198
SRR6868818	C_pepo_014	C_pepo	Cucurbitaceae	leaf	biotic	PRJNA439198
SRR6868825	C_pepo_014	C_pepo	Cucurbitaceae	leaf	biotic	PRJNA439198
SRR6868828	C_pepo_014	C_pepo	Cucurbitaceae	leaf	biotic	PRJNA439198
SRR6868820	C_pepo_015	C_pepo	Cucurbitaceae	leaf	biotic	PRJNA439198
SRR6868821	C_pepo_015	C_pepo	Cucurbitaceae	leaf	biotic	PRJNA439198
SRR6868822	C_pepo_015	C_pepo	Cucurbitaceae	leaf	biotic	PRJNA439198
SRR6868826	C_pepo_016	C_pepo	Cucurbitaceae	leaf	healthy	PRJNA439198
SRR6868827	C_pepo_016	C_pepo	Cucurbitaceae	leaf	healthy	PRJNA439198
SRR6868832	C_pepo_016	C_pepo	Cucurbitaceae	leaf	healthy	PRJNA439198
SRR6868830	C_pepo_017	C_pepo	Cucurbitaceae	leaf	healthy	PRJNA439198
SRR6868831	C_pepo_017	C_pepo	Cucurbitaceae	leaf	healthy	PRJNA439198
SRR6868833	C_pepo_017	C_pepo	Cucurbitaceae	leaf	healthy	PRJNA439198
SRR3938279	C_quinoa_001	C_quinoa	Amaranthacea	stem	healthy	PRJNA306026
SRR3938280	C_quinoa_002	C_quinoa	Amaranthacea	stem	healthy	PRJNA306026
SRR3938281	C_quinoa_003	C_quinoa	Amaranthacea	seedling	healthy	PRJNA306026
SRR3938282	C_quinoa_004	C_quinoa	Amaranthacea	flower	healthy	PRJNA306026
SRR3938283	C_quinoa_005	C_quinoa	Amaranthacea	leaf	healthy	PRJNA306026
SRR3938284	C_quinoa_006	C_quinoa	Amaranthacea	stem	healthy	PRJNA306026
SRR1622092	C_reinhardtii_001	C_reinhardtii	Chlamydomoadaceae	other	healthy	NA
SRR1622090	C_reinhardtii_002	C_reinhardtii	Chlamydomoadaceae	other	healthy	NA
SRR1622094	C_reinhardtii_003	C_reinhardtii	Chlamydomoadaceae	other	healthy	NA
SRR1622093	C_reinhardtii_004	C_reinhardtii	Chlamydomoadaceae	other	healthy	NA
SRR1622091	C_reinhardtii_005	C_reinhardtii	Chlamydomoadaceae	other	healthy	NA
SRR1622081	C_reinhardtii_006	C_reinhardtii	Chlamydomoadaceae	other	healthy	NA
SRR1622082	C_reinhardtii_007	C_reinhardtii	Chlamydomoadaceae	other	healthy	NA
SRR1622089	C_reinhardtii_008	C_reinhardtii	Chlamydomoadaceae	other	healthy	NA
SRR1622083	C_reinhardtii_009	C_reinhardtii	Chlamydomoadaceae	other	healthy	NA
SRR1622085	C_reinhardtii_010	C_reinhardtii	Chlamydomoadaceae	other	healthy	NA
SRR1622087	C_reinhardtii_011	C_reinhardtii	Chlamydomoadaceae	other	healthy	NA
SRR1622088	C_reinhardtii_012	C_reinhardtii	Chlamydomoadaceae	other	healthy	NA
SRR1622084	C_reinhardtii_013	C_reinhardtii	Chlamydomoadaceae	other	healthy	NA
SRR1622086	C_reinhardtii_014	C_reinhardtii	Chlamydomoadaceae	other	healthy	NA
SRR1622079	C_reinhardtii_015	C_reinhardtii	Chlamydomoadaceae	other	healthy	NA
SRR1622080	C_reinhardtii_016	C_reinhardtii	Chlamydomoadaceae	other	healthy	NA
SRR5920414	C_sativa_001	C_sativa	Brassicaceae	stem	healthy	PRJNA397728
SRR5920413	C_sativa_001	C_sativa	Brassicaceae	stem	healthy	PRJNA397728
SRR5920412	C_sativa_001	C_sativa	Brassicaceae	stem	healthy	PRJNA397728
SRR5920411	C_sativa_002	C_sativa	Brassicaceae	stem	salt	PRJNA397728
SRR5920410	C_sativa_002	C_sativa	Brassicaceae	stem	salt	PRJNA397728
SRR5920409	C_sativa_002	C_sativa	Brassicaceae	stem	salt	PRJNA397728
SRR5920408	C_sativa_003	C_sativa	Brassicaceae	root	healthy	PRJNA397728
SRR5920407	C_sativa_003	C_sativa	Brassicaceae	root	healthy	PRJNA397728
SRR5920406	C_sativa_003	C_sativa	Brassicaceae	root	healthy	PRJNA397728
SRR5920405	C_sativa_004	C_sativa	Brassicaceae	root	salt	PRJNA397728
SRR5920404	C_sativa_004	C_sativa	Brassicaceae	root	salt	PRJNA397728
SRR5920403	C_sativa_004	C_sativa	Brassicaceae	root	salt	PRJNA397728
SRR1171897	C_sativa_005	C_sativa	Brassicaceae	leaf	healthy	PRJNA231618
SRR1171899	C_sativa_005	C_sativa	Brassicaceae	leaf	healthy	PRJNA231618
SRR1171901	C_sativa_005	C_sativa	Brassicaceae	leaf	healthy	PRJNA231618
SRR1171925	C_sativa_006	C_sativa	Brassicaceae	stem	healthy	PRJNA231618
SRR1171927	C_sativa_006	C_sativa	Brassicaceae	stem	healthy	PRJNA231618
SRR1171926	C_sativa_006	C_sativa	Brassicaceae	stem	healthy	PRJNA231618
SRR1171928	C_sativa_007	C_sativa	Brassicaceae	root	healthy	PRJNA231618
SRR1171929	C_sativa_007	C_sativa	Brassicaceae	root	healthy	PRJNA231618
SRR1171931	C_sativa_007	C_sativa	Brassicaceae	root	healthy	PRJNA231618
SRR1171951	C_sativa_008	C_sativa	Brassicaceae	flower	healthy	PRJNA231618
SRR1171950	C_sativa_008	C_sativa	Brassicaceae	flower	healthy	PRJNA231618
SRR1171949	C_sativa_008	C_sativa	Brassicaceae	flower	healthy	PRJNA231618
SRR1171972	C_sativa_009	C_sativa	Brassicaceae	seed	healthy	PRJNA231618
SRR1171971	C_sativa_009	C_sativa	Brassicaceae	seed	healthy	PRJNA231618
SRR1171973	C_sativa_009	C_sativa	Brassicaceae	seed	healthy	PRJNA231618
SRR5117338	C_zofingiensis_001	C_zofingiensis	Chlorophyceae	other	healthy	NA
SRR5117337	C_zofingiensis_002	C_zofingiensis	Chlorophyceae	other	healthy	NA
SRR5117336	C_zofingiensis_003	C_zofingiensis	Chlorophyceae	other	healthy	NA
SRR5117335	C_zofingiensis_004	C_zofingiensis	Chlorophyceae	other	healthy	NA
SRR5117334	C_zofingiensis_005	C_zofingiensis	Chlorophyceae	other	light	NA
SRR5117333	C_zofingiensis_006	C_zofingiensis	Chlorophyceae	other	light	NA
SRR5117332	C_zofingiensis_007	C_zofingiensis	Chlorophyceae	other	light	NA
SRR5117331	C_zofingiensis_008	C_zofingiensis	Chlorophyceae	other	light	NA
SRR5117330	C_zofingiensis_009	C_zofingiensis	Chlorophyceae	other	light	NA
SRR5117329	C_zofingiensis_010	C_zofingiensis	Chlorophyceae	other	light	NA
SRR5117328	C_zofingiensis_011	C_zofingiensis	Chlorophyceae	other	light	NA
SRR5117327	C_zofingiensis_012	C_zofingiensis	Chlorophyceae	other	light	NA
SRR5117326	C_zofingiensis_013	C_zofingiensis	Chlorophyceae	other	light	NA
SRR5117325	C_zofingiensis_014	C_zofingiensis	Chlorophyceae	other	light	NA
SRR5117324	C_zofingiensis_015	C_zofingiensis	Chlorophyceae	other	light	NA
SRR5117323	C_zofingiensis_016	C_zofingiensis	Chlorophyceae	other	light	NA
SRR5117322	C_zofingiensis_017	C_zofingiensis	Chlorophyceae	other	light	NA
SRR5117321	C_zofingiensis_018	C_zofingiensis	Chlorophyceae	other	light	NA
SRR5117320	C_zofingiensis_019	C_zofingiensis	Chlorophyceae	other	light	NA
SRR5117319	C_zofingiensis_020	C_zofingiensis	Chlorophyceae	other	light	NA
SRR5117318	C_zofingiensis_021	C_zofingiensis	Chlorophyceae	other	light	NA
SRR5117317	C_zofingiensis_022	C_zofingiensis	Chlorophyceae	other	light	NA
SRR5117316	C_zofingiensis_023	C_zofingiensis	Chlorophyceae	other	light	NA
SRR5117315	C_zofingiensis_024	C_zofingiensis	Chlorophyceae	other	light	NA
SRR5117314	C_zofingiensis_025	C_zofingiensis	Chlorophyceae	other	light	NA
SRR5117313	C_zofingiensis_026	C_zofingiensis	Chlorophyceae	other	light	NA
SRR5117312	C_zofingiensis_027	C_zofingiensis	Chlorophyceae	other	light	NA
SRR5117311	C_zofingiensis_028	C_zofingiensis	Chlorophyceae	other	light	NA
SRR5117310	C_zofingiensis_029	C_zofingiensis	Chlorophyceae	other	light	NA
SRR5117309	C_zofingiensis_030	C_zofingiensis	Chlorophyceae	other	light	NA
SRR5117308	C_zofingiensis_031	C_zofingiensis	Chlorophyceae	other	light	NA
SRR5117307	C_zofingiensis_032	C_zofingiensis	Chlorophyceae	other	light	NA
SRR5117306	C_zofingiensis_033	C_zofingiensis	Chlorophyceae	other	light	NA
SRR5117305	C_zofingiensis_034	C_zofingiensis	Chlorophyceae	other	light	NA
SRR5117304	C_zofingiensis_035	C_zofingiensis	Chlorophyceae	other	light	NA
SRR5117303	C_zofingiensis_036	C_zofingiensis	Chlorophyceae	other	light	NA
SRR5117302	C_zofingiensis_037	C_zofingiensis	Chlorophyceae	other	light	NA
SRR5117301	C_zofingiensis_038	C_zofingiensis	Chlorophyceae	other	light	NA
SRR5117300	C_zofingiensis_039	C_zofingiensis	Chlorophyceae	other	light	NA
SRR5117299	C_zofingiensis_040	C_zofingiensis	Chlorophyceae	other	light	NA
SRR5117298	C_zofingiensis_041	C_zofingiensis	Chlorophyceae	other	light	NA
SRR5117297	C_zofingiensis_042	C_zofingiensis	Chlorophyceae	other	light	NA
SRR5117296	C_zofingiensis_043	C_zofingiensis	Chlorophyceae	other	light	NA
SRR5117295	C_zofingiensis_044	C_zofingiensis	Chlorophyceae	other	light	NA
SRR5117294	C_zofingiensis_045	C_zofingiensis	Chlorophyceae	other	nitrogen	NA
SRR5117293	C_zofingiensis_046	C_zofingiensis	Chlorophyceae	other	other	NA
SRR5117292	C_zofingiensis_047	C_zofingiensis	Chlorophyceae	other	other	NA
SRR5117291	C_zofingiensis_048	C_zofingiensis	Chlorophyceae	other	light	NA
SRR5117290	C_zofingiensis_049	C_zofingiensis	Chlorophyceae	other	light	NA
SRR5117289	C_zofingiensis_050	C_zofingiensis	Chlorophyceae	other	light	NA
SRR5117288	C_zofingiensis_051	C_zofingiensis	Chlorophyceae	other	other	NA
SRR5117287	C_zofingiensis_052	C_zofingiensis	Chlorophyceae	other	light	NA
SRR5117286	C_zofingiensis_053	C_zofingiensis	Chlorophyceae	other	other	NA
SRR5117285	C_zofingiensis_054	C_zofingiensis	Chlorophyceae	other	phosphorus	NA
SRR5117284	C_zofingiensis_055	C_zofingiensis	Chlorophyceae	other	other	NA
SRR5117283	C_zofingiensis_056	C_zofingiensis	Chlorophyceae	other	other	NA
SRR5117282	C_zofingiensis_057	C_zofingiensis	Chlorophyceae	other	other	NA
SRR5117281	C_zofingiensis_058	C_zofingiensis	Chlorophyceae	other	light	NA
ERR1100836	Csinensis_001	Csinensis	Theaceae	leaf	drought	NA
ERR1100837	Csinensis_002	Csinensis	Theaceae	leaf	drought	NA
ERR1100838	Csinensis_003	Csinensis	Theaceae	leaf	drought	NA
ERR1100839	Csinensis_004	Csinensis	Theaceae	leaf	salt	NA
ERR1100840	Csinensis_005	Csinensis	Theaceae	leaf	salt	NA
ERR1100841	Csinensis_006	Csinensis	Theaceae	leaf	salt	NA
ERR1100842	Csinensis_007	Csinensis	Theaceae	leaf	healthy	NA
ERR1100843	Csinensis_008	Csinensis	Theaceae	leaf	healthy	NA
ERR1100844	Csinensis_009	Csinensis	Theaceae	leaf	healthy	NA
ERR1100845	Csinensis_010	Csinensis	Theaceae	leaf	healthy	NA
SRR10033003	Csinensis_011	Csinensis	Theaceae	root	healthy	NA
SRR10033004	Csinensis_011	Csinensis	Theaceae	root	healthy	NA
SRR10033005	Csinensis_011	Csinensis	Theaceae	root	healthy	NA
SRR10033006	Csinensis_012	Csinensis	Theaceae	stem	healthy	NA
SRR10033007	Csinensis_012	Csinensis	Theaceae	stem	healthy	NA
SRR10033008	Csinensis_012	Csinensis	Theaceae	stem	healthy	NA
SRR10033009	Csinensis_013	Csinensis	Theaceae	leaf	healthy	NA
SRR10033010	Csinensis_013	Csinensis	Theaceae	leaf	healthy	NA
SRR10033011	Csinensis_013	Csinensis	Theaceae	leaf	healthy	NA
SRR2148999	D_carota_001	D_carota	Apiaceae	seed	healthy	PRJNA291977
SRR2148998	D_carota_002	D_carota	Apiaceae	leaf	other	PRJNA291977
SRR2148997	D_carota_003	D_carota	Apiaceae	root	other	PRJNA291977
SRR2148996	D_carota_004	D_carota	Apiaceae	leaf	other	PRJNA291977
SRR2148994	D_carota_005	D_carota	Apiaceae	leaf	other	PRJNA291977
SRR2148993	D_carota_006	D_carota	Apiaceae	leaf	other	PRJNA291977
SRR2148992	D_carota_007	D_carota	Apiaceae	stem	healthy	PRJNA291977
SRR2148991	D_carota_008	D_carota	Apiaceae	root	healthy	PRJNA291977
SRR2148990	D_carota_009	D_carota	Apiaceae	root	healthy	PRJNA291977
SRR2148989	D_carota_010	D_carota	Apiaceae	root	healthy	PRJNA291977
SRR2148988	D_carota_011	D_carota	Apiaceae	root	healthy	PRJNA291977
SRR2148987	D_carota_012	D_carota	Apiaceae	stem	healthy	PRJNA291977
SRR2148986	D_carota_013	D_carota	Apiaceae	leaf	healthy	PRJNA291977
SRR2148985	D_carota_014	D_carota	Apiaceae	leaf	healthy	PRJNA291977
SRR2148984	D_carota_015	D_carota	Apiaceae	leaf	healthy	PRJNA291977
SRR2148983	D_carota_016	D_carota	Apiaceae	flower	healthy	PRJNA291977
SRR2148982	D_carota_017	D_carota	Apiaceae	flower	healthy	PRJNA291977
SRR2148981	D_carota_018	D_carota	Apiaceae	flower	healthy	PRJNA291977
SRR2148980	D_carota_019	D_carota	Apiaceae	flower	healthy	PRJNA291977
SRR2148979	D_carota_020	D_carota	Apiaceae	flower	healthy	PRJNA291977
ERR1817363	F_ananassa_001	F_ananassa	Rosaceae	leaf	healthy	PRJEB12420
ERR1817364	F_ananassa_001	F_ananassa	Rosaceae	leaf	healthy	PRJEB12420
ERR1817365	F_ananassa_001	F_ananassa	Rosaceae	leaf	healthy	PRJEB12420
ERR1817366	F_ananassa_002	F_ananassa	Rosaceae	root	healthy	PRJEB12420
ERR1817367	F_ananassa_002	F_ananassa	Rosaceae	root	healthy	PRJEB12420
ERR1817368	F_ananassa_002	F_ananassa	Rosaceae	root	healthy	PRJEB12420
SRR8298768	F_ananassa_003	F_ananassa	Rosaceae	leaf	healthy	PRJNA508389
SRR8298769	F_ananassa_004	F_ananassa	Rosaceae	flower	healthy	PRJNA508389
SRR8298770	F_ananassa_005	F_ananassa	Rosaceae	flower	healthy	PRJNA508389
SRR8298771	F_ananassa_006	F_ananassa	Rosaceae	root	salt	PRJNA508389
SRR8298772	F_ananassa_006	F_ananassa	Rosaceae	root	healthy	PRJNA508389
SRR1695160	G_hirsutum_001	G_hirsutum	Malvaceae	seed	healthy	PRJNA248163
SRR1695161	G_hirsutum_002	G_hirsutum	Malvaceae	seed	healthy	PRJNA248163
SRR1695162	G_hirsutum_003	G_hirsutum	Malvaceae	seed	healthy	PRJNA248163
SRR1695163	G_hirsutum_004	G_hirsutum	Malvaceae	seedling	healthy	PRJNA248163
SRR1695164	G_hirsutum_005	G_hirsutum	Malvaceae	seedling	healthy	PRJNA248163
SRR1695165	G_hirsutum_006	G_hirsutum	Malvaceae	seedling	healthy	PRJNA248163
SRR1695166	G_hirsutum_007	G_hirsutum	Malvaceae	seedling	healthy	PRJNA248163
SRR1695167	G_hirsutum_008	G_hirsutum	Malvaceae	seedling	healthy	PRJNA248163
SRR1695168	G_hirsutum_009	G_hirsutum	Malvaceae	root	healthy	PRJNA248163
SRR1695169	G_hirsutum_010	G_hirsutum	Malvaceae	root	healthy	PRJNA248163
SRR1695170	G_hirsutum_011	G_hirsutum	Malvaceae	root	healthy	PRJNA248163
SRR1695171	G_hirsutum_012	G_hirsutum	Malvaceae	root	healthy	PRJNA248163
SRR1695172	G_hirsutum_013	G_hirsutum	Malvaceae	root	healthy	PRJNA248163
SRR1695173	G_hirsutum_014	G_hirsutum	Malvaceae	root	healthy	PRJNA248163
SRR1695174	G_hirsutum_015	G_hirsutum	Malvaceae	stem	healthy	PRJNA248163
SRR1695175	G_hirsutum_016	G_hirsutum	Malvaceae	leaf	healthy	PRJNA248163
SRR1695176	G_hirsutum_017	G_hirsutum	Malvaceae	other	healthy	PRJNA248163
SRR1695177	G_hirsutum_018	G_hirsutum	Malvaceae	flower	healthy	PRJNA248163
SRR1695178	G_hirsutum_019	G_hirsutum	Malvaceae	flower	healthy	PRJNA248163
SRR1695179	G_hirsutum_020	G_hirsutum	Malvaceae	flower	healthy	PRJNA248163
SRR1695180	G_hirsutum_021	G_hirsutum	Malvaceae	other	healthy	PRJNA248163
SRR1695181	G_hirsutum_022	G_hirsutum	Malvaceae	other	healthy	PRJNA248163
SRR1695182	G_hirsutum_023	G_hirsutum	Malvaceae	other	healthy	PRJNA248163
SRR1695183	G_hirsutum_024	G_hirsutum	Malvaceae	other	healthy	PRJNA248163
SRR1695184	G_hirsutum_025	G_hirsutum	Malvaceae	other	healthy	PRJNA248163
SRR1695185	G_hirsutum_026	G_hirsutum	Malvaceae	other	healthy	PRJNA248163
SRR1695186	G_hirsutum_027	G_hirsutum	Malvaceae	other	healthy	PRJNA248163
SRR1695187	G_hirsutum_028	G_hirsutum	Malvaceae	other	healthy	PRJNA248163
SRR1695188	G_hirsutum_029	G_hirsutum	Malvaceae	other	healthy	PRJNA248163
SRR1695189	G_hirsutum_030	G_hirsutum	Malvaceae	other	healthy	PRJNA248163
SRR1695190	G_hirsutum_031	G_hirsutum	Malvaceae	other	healthy	PRJNA248163
SRR1695191	G_hirsutum_032	G_hirsutum	Malvaceae	other	healthy	PRJNA248163
SRR1695192	G_hirsutum_033	G_hirsutum	Malvaceae	other	healthy	PRJNA248163
SRR1695193	G_hirsutum_034	G_hirsutum	Malvaceae	other	healthy	PRJNA248163
SRR1695194	G_hirsutum_035	G_hirsutum	Malvaceae	other	healthy	PRJNA248163
SRR1768504	G_hirsutum_036	G_hirsutum	Malvaceae	leaf	cold	PRJNA248163
SRR1768505	G_hirsutum_037	G_hirsutum	Malvaceae	leaf	cold	PRJNA248163
SRR1768506	G_hirsutum_038	G_hirsutum	Malvaceae	leaf	cold	PRJNA248163
SRR1768507	G_hirsutum_039	G_hirsutum	Malvaceae	leaf	cold	PRJNA248163
SRR1768508	G_hirsutum_040	G_hirsutum	Malvaceae	leaf	heat	PRJNA248163
SRR1768509	G_hirsutum_041	G_hirsutum	Malvaceae	leaf	heat	PRJNA248163
SRR1768510	G_hirsutum_042	G_hirsutum	Malvaceae	leaf	heat	PRJNA248163
SRR1768511	G_hirsutum_043	G_hirsutum	Malvaceae	leaf	heat	PRJNA248163
SRR1768512	G_hirsutum_044	G_hirsutum	Malvaceae	leaf	salt	PRJNA248163
SRR1768513	G_hirsutum_045	G_hirsutum	Malvaceae	leaf	salt	PRJNA248163
SRR1768514	G_hirsutum_046	G_hirsutum	Malvaceae	leaf	salt	PRJNA248163
SRR1768515	G_hirsutum_047	G_hirsutum	Malvaceae	leaf	salt	PRJNA248163
SRR1768516	G_hirsutum_048	G_hirsutum	Malvaceae	leaf	other	PRJNA248163
SRR1768517	G_hirsutum_049	G_hirsutum	Malvaceae	leaf	other	PRJNA248163
SRR1768518	G_hirsutum_050	G_hirsutum	Malvaceae	leaf	other	PRJNA248163
SRR1768519	G_hirsutum_051	G_hirsutum	Malvaceae	leaf	other	PRJNA248163
SRR1768520	G_hirsutum_052	G_hirsutum	Malvaceae	leaf	healthy	PRJNA248163
SRR1768521	G_hirsutum_053	G_hirsutum	Malvaceae	leaf	healthy	PRJNA248163
SRR1768522	G_hirsutum_054	G_hirsutum	Malvaceae	leaf	healthy	PRJNA248163
SRR1768523	G_hirsutum_055	G_hirsutum	Malvaceae	leaf	healthy	PRJNA248163
SRR1768524	G_hirsutum_056	G_hirsutum	Malvaceae	leaf	healthy	PRJNA248163
SRR8113445	G_hirsutum_057	G_hirsutum	Malvaceae	leaf	cold	PRJNA498759
SRR8115523	G_hirsutum_057	G_hirsutum	Malvaceae	leaf	cold	PRJNA498759
SRR8136840	G_hirsutum_057	G_hirsutum	Malvaceae	leaf	cold	PRJNA498759
SRR8117284	G_hirsutum_058	G_hirsutum	Malvaceae	leaf	cold	PRJNA498759
SRR8142950	G_hirsutum_058	G_hirsutum	Malvaceae	leaf	cold	PRJNA498759
SRR8146228	G_hirsutum_058	G_hirsutum	Malvaceae	leaf	cold	PRJNA498759
SRR8149448	G_hirsutum_059	G_hirsutum	Malvaceae	leaf	cold	PRJNA498759
SRR8156069	G_hirsutum_059	G_hirsutum	Malvaceae	leaf	cold	PRJNA498759
SRR8162806	G_hirsutum_059	G_hirsutum	Malvaceae	leaf	cold	PRJNA498759
SRR8121126	G_hirsutum_060	G_hirsutum	Malvaceae	leaf	healthy	PRJNA498759
SRR8144251	G_hirsutum_060	G_hirsutum	Malvaceae	leaf	healthy	PRJNA498759
SRR8156028	G_hirsutum_060	G_hirsutum	Malvaceae	leaf	healthy	PRJNA498759
SRR8894224	G_hirsutum_061	G_hirsutum	Malvaceae	seedling	salt	PRJNA532694
SRR8894225	G_hirsutum_061	G_hirsutum	Malvaceae	seedling	salt	PRJNA532694
SRR8894261	G_hirsutum_061	G_hirsutum	Malvaceae	seedling	salt	PRJNA532694
SRR8894260	G_hirsutum_062	G_hirsutum	Malvaceae	seedling	salt	PRJNA532694
SRR8894259	G_hirsutum_062	G_hirsutum	Malvaceae	seedling	salt	PRJNA532694
SRR8894258	G_hirsutum_062	G_hirsutum	Malvaceae	seedling	salt	PRJNA532694
SRR8894243	G_hirsutum_063	G_hirsutum	Malvaceae	seedling	healthy	PRJNA532694
SRR8894245	G_hirsutum_063	G_hirsutum	Malvaceae	seedling	healthy	PRJNA532694
SRR8894246	G_hirsutum_063	G_hirsutum	Malvaceae	seedling	healthy	PRJNA532694
SRR8894263	G_hirsutum_064	G_hirsutum	Malvaceae	seedling	salt	PRJNA532694
SRR8894264	G_hirsutum_064	G_hirsutum	Malvaceae	seedling	salt	PRJNA532694
SRR8894265	G_hirsutum_064	G_hirsutum	Malvaceae	seedling	salt	PRJNA532694
SRR8894262	G_hirsutum_065	G_hirsutum	Malvaceae	seedling	salt	PRJNA532694
SRR8894267	G_hirsutum_065	G_hirsutum	Malvaceae	seedling	salt	PRJNA532694
SRR8894268	G_hirsutum_065	G_hirsutum	Malvaceae	seedling	salt	PRJNA532694
SRR8894239	G_hirsutum_066	G_hirsutum	Malvaceae	seedling	salt	PRJNA532694
SRR8894241	G_hirsutum_066	G_hirsutum	Malvaceae	seedling	salt	PRJNA532694
SRR8894270	G_hirsutum_066	G_hirsutum	Malvaceae	seedling	salt	PRJNA532694
SRR8894236	G_hirsutum_067	G_hirsutum	Malvaceae	seedling	other	PRJNA532694
SRR8894238	G_hirsutum_067	G_hirsutum	Malvaceae	seedling	other	PRJNA532694
SRR8894271	G_hirsutum_067	G_hirsutum	Malvaceae	seedling	other	PRJNA532694
SRR8894227	G_hirsutum_068	G_hirsutum	Malvaceae	seedling	other	PRJNA532694
SRR8894252	G_hirsutum_068	G_hirsutum	Malvaceae	seedling	other	PRJNA532694
SRR8894257	G_hirsutum_068	G_hirsutum	Malvaceae	seedling	other	PRJNA532694
SRR8894253	G_hirsutum_069	G_hirsutum	Malvaceae	seedling	other	PRJNA532694
SRR8894266	G_hirsutum_069	G_hirsutum	Malvaceae	seedling	other	PRJNA532694
SRR8894269	G_hirsutum_069	G_hirsutum	Malvaceae	seedling	other	PRJNA532694
SRR8894226	G_hirsutum_070	G_hirsutum	Malvaceae	seedling	other	PRJNA532694
SRR8894237	G_hirsutum_070	G_hirsutum	Malvaceae	seedling	other	PRJNA532694
SRR8894249	G_hirsutum_070	G_hirsutum	Malvaceae	seedling	other	PRJNA532694
SRR8894251	G_hirsutum_071	G_hirsutum	Malvaceae	seedling	other	PRJNA532694
SRR8894254	G_hirsutum_071	G_hirsutum	Malvaceae	seedling	other	PRJNA532694
SRR8894256	G_hirsutum_071	G_hirsutum	Malvaceae	seedling	other	PRJNA532694
SRR8894240	G_hirsutum_072	G_hirsutum	Malvaceae	root	biotic	PRJNA532694
SRR8894247	G_hirsutum_072	G_hirsutum	Malvaceae	root	biotic	PRJNA532694
SRR8894248	G_hirsutum_072	G_hirsutum	Malvaceae	root	biotic	PRJNA532694
SRR8894230	G_hirsutum_073	G_hirsutum	Malvaceae	root	biotic	PRJNA532694
SRR8894231	G_hirsutum_073	G_hirsutum	Malvaceae	root	biotic	PRJNA532694
SRR8894242	G_hirsutum_073	G_hirsutum	Malvaceae	root	biotic	PRJNA532694
SRR8894228	G_hirsutum_074	G_hirsutum	Malvaceae	root	biotic	PRJNA532694
SRR8894229	G_hirsutum_074	G_hirsutum	Malvaceae	root	biotic	PRJNA532694
SRR8894234	G_hirsutum_074	G_hirsutum	Malvaceae	root	biotic	PRJNA532694
SRR8894244	G_hirsutum_075	G_hirsutum	Malvaceae	root	biotic	PRJNA532694
SRR8894250	G_hirsutum_075	G_hirsutum	Malvaceae	root	biotic	PRJNA532694
SRR8894255	G_hirsutum_075	G_hirsutum	Malvaceae	root	biotic	PRJNA532694
SRR8894232	G_hirsutum_076	G_hirsutum	Malvaceae	root	biotic	PRJNA532694
SRR8894233	G_hirsutum_076	G_hirsutum	Malvaceae	root	biotic	PRJNA532694
SRR8894235	G_hirsutum_076	G_hirsutum	Malvaceae	root	biotic	PRJNA532694
SRR1268082	G_max_001	G_max	Fabaceae	root	healthy	PRJNA246058
SRR1268083	G_max_001	G_max	Fabaceae	root	healthy	PRJNA246058
SRR1268084	G_max_001	G_max	Fabaceae	root	healthy	PRJNA246058
SRR1268085	G_max_002	G_max	Fabaceae	root	drought	PRJNA246058
SRR1268086	G_max_002	G_max	Fabaceae	root	drought	PRJNA246058
SRR1268087	G_max_002	G_max	Fabaceae	root	drought	PRJNA246058
SRR1268088	G_max_003	G_max	Fabaceae	root	drought	PRJNA246058
SRR1268089	G_max_003	G_max	Fabaceae	root	drought	PRJNA246058
SRR1268090	G_max_003	G_max	Fabaceae	root	drought	PRJNA246058
SRR1268091	G_max_004	G_max	Fabaceae	root	drought	PRJNA246058
SRR1268092	G_max_004	G_max	Fabaceae	root	drought	PRJNA246058
SRR1268093	G_max_004	G_max	Fabaceae	root	drought	PRJNA246058
SRR1268094	G_max_005	G_max	Fabaceae	root	salt	PRJNA246058
SRR1268095	G_max_005	G_max	Fabaceae	root	salt	PRJNA246058
SRR1268096	G_max_005	G_max	Fabaceae	root	salt	PRJNA246058
SRR1268097	G_max_006	G_max	Fabaceae	root	salt	PRJNA246058
SRR1268098	G_max_006	G_max	Fabaceae	root	salt	PRJNA246058
SRR1268099	G_max_006	G_max	Fabaceae	root	salt	PRJNA246058
SRR1268100	G_max_007	G_max	Fabaceae	root	salt	PRJNA246058
SRR1268101	G_max_007	G_max	Fabaceae	root	salt	PRJNA246058
SRR1268102	G_max_007	G_max	Fabaceae	root	salt	PRJNA246058
SRR2048167	G_max_008	G_max	Fabaceae	leaf	drought	PRJNA285677
SRR2048168	G_max_008	G_max	Fabaceae	leaf	drought	PRJNA285677
SRR2048169	G_max_008	G_max	Fabaceae	leaf	drought	PRJNA285677
SRR2048170	G_max_009	G_max	Fabaceae	leaf	healthy	PRJNA285677
SRR2048171	G_max_009	G_max	Fabaceae	leaf	healthy	PRJNA285677
SRR2048172	G_max_009	G_max	Fabaceae	leaf	healthy	PRJNA285677
SRR2048173	G_max_010	G_max	Fabaceae	leaf	drought	PRJNA285677
SRR2048174	G_max_010	G_max	Fabaceae	leaf	drought	PRJNA285677
SRR2048175	G_max_010	G_max	Fabaceae	leaf	drought	PRJNA285677
SRR2048176	G_max_011	G_max	Fabaceae	leaf	healthy	PRJNA285677
SRR2048177	G_max_011	G_max	Fabaceae	leaf	healthy	PRJNA285677
SRR2048178	G_max_011	G_max	Fabaceae	leaf	healthy	PRJNA285677
SRR2048191	G_max_012	G_max	Fabaceae	leaf	drought	PRJNA285677
SRR2048192	G_max_012	G_max	Fabaceae	leaf	drought	PRJNA285677
SRR2048193	G_max_012	G_max	Fabaceae	leaf	drought	PRJNA285677
SRR2048194	G_max_013	G_max	Fabaceae	leaf	healthy	PRJNA285677
SRR2048195	G_max_013	G_max	Fabaceae	leaf	healthy	PRJNA285677
SRR2048196	G_max_013	G_max	Fabaceae	leaf	healthy	PRJNA285677
SRR2048197	G_max_014	G_max	Fabaceae	leaf	drought	NA
SRR2048198	G_max_014	G_max	Fabaceae	leaf	drought	NA
SRR2048199	G_max_014	G_max	Fabaceae	leaf	drought	NA
SRR2048200	G_max_015	G_max	Fabaceae	leaf	healthy	PRJNA285677
SRR2048201	G_max_015	G_max	Fabaceae	leaf	healthy	PRJNA285677
SRR2048202	G_max_015	G_max	Fabaceae	leaf	healthy	PRJNA285677
SRR7601335	G_max_016	G_max	Fabaceae	leaf	healthy	PRJNA482945
SRR7601336	G_max_016	G_max	Fabaceae	leaf	healthy	PRJNA482945
SRR7601337	G_max_016	G_max	Fabaceae	leaf	healthy	PRJNA482945
SRR7601338	G_max_017	G_max	Fabaceae	leaf	cold	PRJNA482945
SRR7601339	G_max_017	G_max	Fabaceae	leaf	cold	PRJNA482945
SRR7601340	G_max_017	G_max	Fabaceae	leaf	cold	PRJNA482945
SRR7601341	G_max_018	G_max	Fabaceae	leaf	cold	PRJNA482945
SRR7601342	G_max_018	G_max	Fabaceae	leaf	cold	PRJNA482945
SRR7601343	G_max_018	G_max	Fabaceae	leaf	cold	PRJNA482945
SRR1174206	G_max_019	G_max	Fabaceae	leaf	healthy	PRJNA238493
SRR1174226	G_max_019	G_max	Fabaceae	leaf	healthy	PRJNA238493
SRR1174229	G_max_019	G_max	Fabaceae	leaf	healthy	PRJNA238493
SRR1174205	G_max_020	G_max	Fabaceae	root	healthy	PRJNA238493
SRR1174231	G_max_020	G_max	Fabaceae	stem	healthy	PRJNA238493
SRR1174217	G_max_020	G_max	Fabaceae	flower	healthy	PRJNA238493
SRR1174218	G_max_021	G_max	Fabaceae	flower	healthy	PRJNA238493
SRR1174219	G_max_021	G_max	Fabaceae	flower	healthy	PRJNA238493
SRR1174220	G_max_021	G_max	Fabaceae	flower	healthy	PRJNA238493
SRR1174232	G_max_022	G_max	Fabaceae	flower	healthy	PRJNA238493
SRR1174207	G_max_022	G_max	Fabaceae	seed	healthy	PRJNA238493
SRR1174208	G_max_022	G_max	Fabaceae	seed	healthy	PRJNA238493
SRR1174222	G_max_023	G_max	Fabaceae	seed	healthy	PRJNA238493
SRR1174225	G_max_023	G_max	Fabaceae	seed	healthy	PRJNA238493
SRR1174233	G_max_023	G_max	Fabaceae	seed	healthy	PRJNA238493
SRR1174221	G_max_024	G_max	Fabaceae	fruit	healthy	PRJNA238493
SRR1174223	G_max_024	G_max	Fabaceae	fruit	healthy	PRJNA238493
SRR1174224	G_max_024	G_max	Fabaceae	fruit	healthy	PRJNA238493
SRR9680570	G_raimondii_001	G_raimondii	Malvaceae	leaf	cold	NA
SRR9680571	G_raimondii_001	G_raimondii	Malvaceae	leaf	cold	NA
SRR9680572	G_raimondii_002	G_raimondii	Malvaceae	leaf	healthy	NA
SRR9680573	G_raimondii_002	G_raimondii	Malvaceae	leaf	healthy	NA
SRR9680574	G_raimondii_003	G_raimondii	Malvaceae	leaf	healthy	NA
SRR9680575	G_raimondii_003	G_raimondii	Malvaceae	leaf	healthy	NA
SRR9680576	G_raimondii_004	G_raimondii	Malvaceae	leaf	salt	NA
SRR9680577	G_raimondii_004	G_raimondii	Malvaceae	leaf	salt	NA
SRR9680578	G_raimondii_005	G_raimondii	Malvaceae	leaf	healthy	NA
SRR9680579	G_raimondii_005	G_raimondii	Malvaceae	leaf	healthy	NA
SRR8878508	G_raimondii_006	G_raimondii	Malvaceae	leaf	light	NA
SRR8878526	G_raimondii_006	G_raimondii	Malvaceae	leaf	light	NA
SRR8878818	G_raimondii_006	G_raimondii	Malvaceae	leaf	light	NA
SRR8878511	G_raimondii_007	G_raimondii	Malvaceae	leaf	healthy	NA
SRR8878512	G_raimondii_007	G_raimondii	Malvaceae	leaf	healthy	NA
SRR8878517	G_raimondii_007	G_raimondii	Malvaceae	leaf	healthy	NA
SRR8878533	G_raimondii_008	G_raimondii	Malvaceae	stem	healthy	NA
SRR8878534	G_raimondii_008	G_raimondii	Malvaceae	stem	healthy	NA
SRR8878562	G_raimondii_009	G_raimondii	Malvaceae	flower	healthy	NA
SRR8878564	G_raimondii_009	G_raimondii	Malvaceae	flower	healthy	NA
SRR8878565	G_raimondii_009	G_raimondii	Malvaceae	flower	healthy	NA
SRR8878659	G_raimondii_010	G_raimondii	Malvaceae	leaf	healthy	NA
SRR8878660	G_raimondii_010	G_raimondii	Malvaceae	leaf	healthy	NA
SRR8878661	G_raimondii_010	G_raimondii	Malvaceae	leaf	healthy	NA
SRR8878663	G_raimondii_011	G_raimondii	Malvaceae	leaf	light	NA
SRR8878666	G_raimondii_011	G_raimondii	Malvaceae	leaf	light	NA
SRR8878734	G_raimondii_011	G_raimondii	Malvaceae	leaf	light	NA
SRR8878720	G_raimondii_012	G_raimondii	Malvaceae	stem	healthy	NA
SRR8878721	G_raimondii_012	G_raimondii	Malvaceae	stem	healthy	NA
SRR8878723	G_raimondii_012	G_raimondii	Malvaceae	stem	healthy	NA
SRR8878730	G_raimondii_013	G_raimondii	Malvaceae	stem	healthy	NA
SRR8878745	G_raimondii_014	G_raimondii	Malvaceae	other	healthy	NA
SRR8878752	G_raimondii_014	G_raimondii	Malvaceae	other	healthy	NA
SRR8878792	G_raimondii_015	G_raimondii	Malvaceae	flower	healthy	NA
SRR8878799	G_raimondii_015	G_raimondii	Malvaceae	flower	healthy	NA
SRR8878800	G_raimondii_015	G_raimondii	Malvaceae	flower	healthy	NA
SRR8267553	G_raimondii_016	G_raimondii	Malvaceae	root	healthy	NA
SRR8267554	G_raimondii_016	G_raimondii	Malvaceae	root	healthy	NA
SRR8267555	G_raimondii_016	G_raimondii	Malvaceae	root	healthy	NA
SRR8267556	G_raimondii_017	G_raimondii	Malvaceae	stem	healthy	NA
SRR8267557	G_raimondii_017	G_raimondii	Malvaceae	stem	healthy	NA
SRR8267558	G_raimondii_017	G_raimondii	Malvaceae	stem	healthy	NA
SRR8267559	G_raimondii_018	G_raimondii	Malvaceae	leaf	healthy	NA
SRR8267560	G_raimondii_018	G_raimondii	Malvaceae	leaf	healthy	NA
SRR8267561	G_raimondii_018	G_raimondii	Malvaceae	leaf	healthy	NA
SRR8267562	G_raimondii_019	G_raimondii	Malvaceae	root	biotic	NA
SRR8267563	G_raimondii_019	G_raimondii	Malvaceae	root	biotic	NA
SRR8267564	G_raimondii_019	G_raimondii	Malvaceae	root	biotic	NA
SRR8267565	G_raimondii_020	G_raimondii	Malvaceae	stem	biotic	NA
SRR8267566	G_raimondii_020	G_raimondii	Malvaceae	stem	biotic	NA
SRR8267567	G_raimondii_020	G_raimondii	Malvaceae	stem	biotic	NA
SRR8267568	G_raimondii_021	G_raimondii	Malvaceae	leaf	biotic	NA
SRR8267569	G_raimondii_021	G_raimondii	Malvaceae	leaf	biotic	NA
SRR8267570	G_raimondii_021	G_raimondii	Malvaceae	leaf	biotic	NA
SRR8267571	G_raimondii_022	G_raimondii	Malvaceae	root	biotic	NA
SRR8267572	G_raimondii_022	G_raimondii	Malvaceae	root	biotic	NA
SRR8267573	G_raimondii_022	G_raimondii	Malvaceae	root	biotic	NA
SRR8267574	G_raimondii_023	G_raimondii	Malvaceae	stem	biotic	NA
SRR8267575	G_raimondii_023	G_raimondii	Malvaceae	stem	biotic	NA
SRR8267576	G_raimondii_023	G_raimondii	Malvaceae	stem	biotic	NA
SRR8267577	G_raimondii_024	G_raimondii	Malvaceae	leaf	biotic	NA
SRR8267578	G_raimondii_024	G_raimondii	Malvaceae	leaf	biotic	NA
SRR8267579	G_raimondii_024	G_raimondii	Malvaceae	leaf	biotic	NA
SRR530667	G_raimondii_025	G_raimondii	Malvaceae	leaf	healthy	NA
SRR530668	G_raimondii_025	G_raimondii	Malvaceae	leaf	healthy	NA
SRR530669	G_raimondii_025	G_raimondii	Malvaceae	leaf	healthy	NA
SRR389181	G_raimondii_026	G_raimondii	Malvaceae	other	healthy	NA
SRR389182	G_raimondii_027	G_raimondii	Malvaceae	other	healthy	NA
SRR389183	G_raimondii_028	G_raimondii	Malvaceae	leaf	healthy	NA
SRR203240	G_raimondii_029	G_raimondii	Malvaceae	other	healthy	NA
SRR203250	G_raimondii_030	G_raimondii	Malvaceae	other	healthy	NA
SRR391534	G_raimondii_031	G_raimondii	Malvaceae	other	healthy	NA
SRR4996791	H_annuus_001	H_annuus	Asteraceae	leaf	other
SRR4996792	H_annuus_002	H_annuus	Asteraceae	leaf	healthy
SRR4996793	H_annuus_003	H_annuus	Asteraceae	leaf	drought
SRR4996796	H_annuus_004	H_annuus	Asteraceae	leaf	other
SRR4996802	H_annuus_005	H_annuus	Asteraceae	leaf	drought
SRR4996804	H_annuus_006	H_annuus	Asteraceae	leaf	drought
SRR4996810	H_annuus_007	H_annuus	Asteraceae	leaf	drought
SRR4996813	H_annuus_008	H_annuus	Asteraceae	leaf	drought
SRR4996824	H_annuus_009	H_annuus	Asteraceae	leaf	drought
SRR4996825	H_annuus_010	H_annuus	Asteraceae	leaf	drought
SRR4996795	H_annuus_011	H_annuus	Asteraceae	leaf	other
SRR4996794	H_annuus_012	H_annuus	Asteraceae	leaf	other
SRR4996797	H_annuus_013	H_annuus	Asteraceae	leaf	other
SRR4996798	H_annuus_014	H_annuus	Asteraceae	leaf	healthy
SRR4996799	H_annuus_015	H_annuus	Asteraceae	stem	healthy
SRR4996800	H_annuus_016	H_annuus	Asteraceae	leaf	healthy
SRR4996801	H_annuus_017	H_annuus	Asteraceae	leaf	healthy
SRR4996803	H_annuus_018	H_annuus	Asteraceae	leaf	other
SRR4996805	H_annuus_019	H_annuus	Asteraceae	root	healthy
SRR4996806	H_annuus_020	H_annuus	Asteraceae	leaf	healthy
SRR4996807	H_annuus_021	H_annuus	Asteraceae	leaf	healthy
SRR4996808	H_annuus_022	H_annuus	Asteraceae	flower	healthy
SRR4996809	H_annuus_023	H_annuus	Asteraceae	flower	healthy
SRR4996811	H_annuus_024	H_annuus	Asteraceae	root	other
SRR4996812	H_annuus_025	H_annuus	Asteraceae	leaf	other
SRR4996814	H_annuus_026	H_annuus	Asteraceae	flower	healthy
SRR4996815	H_annuus_027	H_annuus	Asteraceae	leaf	other
SRR4996816	H_annuus_028	H_annuus	Asteraceae	root	other
SRR4996817	H_annuus_029	H_annuus	Asteraceae	leaf	healthy
SRR4996818	H_annuus_030	H_annuus	Asteraceae	root	healthy
SRR4996819	H_annuus_031	H_annuus	Asteraceae	root	salt
SRR4996820	H_annuus_032	H_annuus	Asteraceae	root	healthy
SRR4996821	H_annuus_033	H_annuus	Asteraceae	leaf	healthy
SRR4996822	H_annuus_034	H_annuus	Asteraceae	flower	healthy
SRR4996823	H_annuus_035	H_annuus	Asteraceae	leaf	other
SRR4996826	H_annuus_036	H_annuus	Asteraceae	root	other
SRR4996827	H_annuus_037	H_annuus	Asteraceae	leaf	other
SRR4996828	H_annuus_038	H_annuus	Asteraceae	leaf	healthy
SRR4996829	H_annuus_039	H_annuus	Asteraceae	leaf	other
SRR4996830	H_annuus_040	H_annuus	Asteraceae	leaf	drought
SRR4996831	H_annuus_041	H_annuus	Asteraceae	seed	healthy	NA
SRR4996832	H_annuus_042	H_annuus	Asteraceae	other	healthy	NA
SRR4996833	H_annuus_043	H_annuus	Asteraceae	flower	healthy	NA
SRR4996834	H_annuus_044	H_annuus	Asteraceae	leaf	salt	NA
SRR4996835	H_annuus_045	H_annuus	Asteraceae	leaf	other	NA
SRR4996836	H_annuus_046	H_annuus	Asteraceae	leaf	healthy	NA
SRR4996837	H_annuus_047	H_annuus	Asteraceae	leaf	drought	NA
SRR4996838	H_annuus_048	H_annuus	Asteraceae	leaf	other	NA
SRR4996839	H_annuus_049	H_annuus	Asteraceae	leaf	other	NA
SRR4996840	H_annuus_050	H_annuus	Asteraceae	leaf	healthy	NA
SRR4996841	H_annuus_051	H_annuus	Asteraceae	leaf	drought	NA
SRR4996842	H_annuus_052	H_annuus	Asteraceae	leaf	other	NA
SRR4996843	H_annuus_053	H_annuus	Asteraceae	leaf	other	NA
SRR4996844	H_annuus_054	H_annuus	Asteraceae	root	other	NA
SRR4996845	H_annuus_055	H_annuus	Asteraceae	root	other	NA
SRR4996846	H_annuus_056	H_annuus	Asteraceae	root	healthy	NA
SRR4996847	H_annuus_057	H_annuus	Asteraceae	root	other	NA
SRR4996848	H_annuus_058	H_annuus	Asteraceae	leaf	drought	NA
SRR4996849	H_annuus_059	H_annuus	Asteraceae	root	other	NA
SRR4996850	H_annuus_060	H_annuus	Asteraceae	leaf	drought	NA
SRR1028011	H_vulgare_001	H_vulgare	Poaceae	leaf	healthy	PRJNA227211
SRR1028012	H_vulgare_001	H_vulgare	Poaceae	leaf	healthy	PRJNA227211
SRR1049626	H_vulgare_001	H_vulgare	Poaceae	leaf	healthy	PRJNA227211
SRR1049570	H_vulgare_002	H_vulgare	Poaceae	leaf	salt	PRJNA227211
SRR1049587	H_vulgare_002	H_vulgare	Poaceae	leaf	salt	PRJNA227211
SRR1055527	H_vulgare_002	H_vulgare	Poaceae	leaf	salt	PRJNA227211
SRR1049592	H_vulgare_003	H_vulgare	Poaceae	leaf	salt	PRJNA227211
SRR1049609	H_vulgare_003	H_vulgare	Poaceae	leaf	salt	PRJNA227211
SRR1049643	H_vulgare_004	H_vulgare	Poaceae	leaf	salt	PRJNA227211
SRR1049648	H_vulgare_004	H_vulgare	Poaceae	leaf	salt	PRJNA227211
SRR1049655	H_vulgare_004	H_vulgare	Poaceae	leaf	salt	PRJNA227211
ERR233228	H_vulgare_005	H_vulgare	Poaceae	seed	healthy	PRJEB3149
ERR233236	H_vulgare_005	H_vulgare	Poaceae	seed	healthy	PRJEB3149
ERR233243	H_vulgare_005	H_vulgare	Poaceae	seed	healthy	PRJEB3149
ERR233251	H_vulgare_005	H_vulgare	Poaceae	seed	healthy	PRJEB3149
ERR233259	H_vulgare_005	H_vulgare	Poaceae	seed	healthy	PRJEB3149
ERR233266	H_vulgare_005	H_vulgare	Poaceae	seed	healthy	PRJEB3149
ERR233229	H_vulgare_006	H_vulgare	Poaceae	seed	healthy	PRJEB3149
ERR233237	H_vulgare_006	H_vulgare	Poaceae	seed	healthy	PRJEB3149
ERR233244	H_vulgare_006	H_vulgare	Poaceae	seed	healthy	PRJEB3149
ERR233252	H_vulgare_006	H_vulgare	Poaceae	seed	healthy	PRJEB3149
ERR233260	H_vulgare_006	H_vulgare	Poaceae	seed	healthy	PRJEB3149
ERR233267	H_vulgare_006	H_vulgare	Poaceae	seed	healthy	PRJEB3149
ERR233230	H_vulgare_007	H_vulgare	Poaceae	root	healthy	PRJEB3149
ERR233238	H_vulgare_007	H_vulgare	Poaceae	root	healthy	PRJEB3149
ERR233245	H_vulgare_007	H_vulgare	Poaceae	root	healthy	PRJEB3149
ERR233253	H_vulgare_007	H_vulgare	Poaceae	root	healthy	PRJEB3149
ERR233261	H_vulgare_007	H_vulgare	Poaceae	root	healthy	PRJEB3149
ERR233268	H_vulgare_007	H_vulgare	Poaceae	root	healthy	PRJEB3149
ERR233231	H_vulgare_008	H_vulgare	Poaceae	seed	healthy	PRJEB3149
ERR233239	H_vulgare_008	H_vulgare	Poaceae	seed	healthy	PRJEB3149
ERR233246	H_vulgare_008	H_vulgare	Poaceae	seed	healthy	PRJEB3149
ERR233254	H_vulgare_008	H_vulgare	Poaceae	seed	healthy	PRJEB3149
ERR233262	H_vulgare_008	H_vulgare	Poaceae	seed	healthy	PRJEB3149
ERR233269	H_vulgare_008	H_vulgare	Poaceae	seed	healthy	PRJEB3149
ERR233232	H_vulgare_009	H_vulgare	Poaceae	stem	healthy	PRJEB3149
ERR233240	H_vulgare_009	H_vulgare	Poaceae	stem	healthy	PRJEB3149
ERR233247	H_vulgare_009	H_vulgare	Poaceae	stem	healthy	PRJEB3149
ERR233255	H_vulgare_009	H_vulgare	Poaceae	stem	healthy	PRJEB3149
ERR233263	H_vulgare_009	H_vulgare	Poaceae	stem	healthy	PRJEB3149
ERR233270	H_vulgare_009	H_vulgare	Poaceae	stem	healthy	PRJEB3149
ERR233233	H_vulgare_010	H_vulgare	Poaceae	flower	healthy	PRJEB3149
ERR233241	H_vulgare_010	H_vulgare	Poaceae	flower	healthy	PRJEB3149
ERR233248	H_vulgare_010	H_vulgare	Poaceae	flower	healthy	PRJEB3149
ERR233256	H_vulgare_010	H_vulgare	Poaceae	flower	healthy	PRJEB3149
ERR233264	H_vulgare_010	H_vulgare	Poaceae	flower	healthy	PRJEB3149
ERR233271	H_vulgare_010	H_vulgare	Poaceae	flower	healthy	PRJEB3149
ERR233234	H_vulgare_011	H_vulgare	Poaceae	stem	healthy	PRJEB3149
ERR233249	H_vulgare_011	H_vulgare	Poaceae	stem	healthy	PRJEB3149
ERR233257	H_vulgare_011	H_vulgare	Poaceae	stem	healthy	PRJEB3149
ERR233272	H_vulgare_011	H_vulgare	Poaceae	stem	healthy	PRJEB3149
ERR233274	H_vulgare_011	H_vulgare	Poaceae	stem	healthy	PRJEB3149
ERR233235	H_vulgare_012	H_vulgare	Poaceae	flower	healthy	PRJEB3149
ERR233242	H_vulgare_012	H_vulgare	Poaceae	flower	healthy	PRJEB3149
ERR233250	H_vulgare_012	H_vulgare	Poaceae	flower	healthy	PRJEB3149
ERR233258	H_vulgare_012	H_vulgare	Poaceae	flower	healthy	PRJEB3149
ERR233265	H_vulgare_012	H_vulgare	Poaceae	flower	healthy	PRJEB3149
ERR233273	H_vulgare_012	H_vulgare	Poaceae	flower	healthy	PRJEB3149
DRR024544	I_nil_001	I_nil	Convolvulaceae	seed	healthy	NA
DRR024545	I_nil_002	I_nil	Convolvulaceae	flower	healthy	NA
DRR024546	I_nil_003	I_nil	Convolvulaceae	leaf	healthy	NA
DRR024547	I_nil_004	I_nil	Convolvulaceae	root	healthy	NA
DRR024548	I_nil_005	I_nil	Convolvulaceae	seed	healthy	NA
DRR024549	I_nil_006	I_nil	Convolvulaceae	stem	healthy	NA
SRR1772255	I_nil_007	I_nil	Convolvulaceae	other	healthy	NA
SRR5918238	K_fedtschenkoi_001	K_fedtschenkoi	Crassulaceae	leaf	light	PRJNA397336
SRR5918239	K_fedtschenkoi_002	K_fedtschenkoi	Crassulaceae	leaf	light	PRJNA397336
SRR5918240	K_fedtschenkoi_003	K_fedtschenkoi	Crassulaceae	leaf	light	PRJNA397336
SRR5918241	K_fedtschenkoi_004	K_fedtschenkoi	Crassulaceae	leaf	light	PRJNA397336
SRR5918242	K_fedtschenkoi_005	K_fedtschenkoi	Crassulaceae	leaf	light	PRJNA397336
SRR5918243	K_fedtschenkoi_006	K_fedtschenkoi	Crassulaceae	leaf	light	PRJNA397336
SRR5918244	K_fedtschenkoi_007	K_fedtschenkoi	Crassulaceae	leaf	light	PRJNA397336
SRR5918245	K_fedtschenkoi_008	K_fedtschenkoi	Crassulaceae	leaf	light	PRJNA397336
SRR5918246	K_fedtschenkoi_009	K_fedtschenkoi	Crassulaceae	seedling	healthy	PRJNA397336
SRR5918247	K_fedtschenkoi_010	K_fedtschenkoi	Crassulaceae	leaf	light	PRJNA397336
SRR5918248	K_fedtschenkoi_011	K_fedtschenkoi	Crassulaceae	leaf	light	PRJNA397336
SRR5918249	K_fedtschenkoi_012	K_fedtschenkoi	Crassulaceae	seedling	healthy	PRJNA397336
SRR5918250	K_fedtschenkoi_013	K_fedtschenkoi	Crassulaceae	root	healthy	PRJNA397336
SRR5918251	K_fedtschenkoi_014	K_fedtschenkoi	Crassulaceae	stem	healthy	PRJNA397336
SRR5918252	K_fedtschenkoi_015	K_fedtschenkoi	Crassulaceae	root	healthy	PRJNA397336
SRR5918253	K_fedtschenkoi_016	K_fedtschenkoi	Crassulaceae	root	healthy	PRJNA397336
SRR5918254	K_fedtschenkoi_017	K_fedtschenkoi	Crassulaceae	leaf	light	PRJNA397336
SRR5918255	K_fedtschenkoi_018	K_fedtschenkoi	Crassulaceae	leaf	light	PRJNA397336
SRR5918256	K_fedtschenkoi_019	K_fedtschenkoi	Crassulaceae	leaf	light	PRJNA397336
SRR5918257	K_fedtschenkoi_020	K_fedtschenkoi	Crassulaceae	leaf	light	PRJNA397336
SRR5918258	K_fedtschenkoi_021	K_fedtschenkoi	Crassulaceae	leaf	light	PRJNA397336
SRR5918259	K_fedtschenkoi_022	K_fedtschenkoi	Crassulaceae	leaf	light	PRJNA397336
SRR5918260	K_fedtschenkoi_023	K_fedtschenkoi	Crassulaceae	leaf	light	PRJNA397336
SRR5918261	K_fedtschenkoi_024	K_fedtschenkoi	Crassulaceae	leaf	light	PRJNA397336
SRR5918262	K_fedtschenkoi_025	K_fedtschenkoi	Crassulaceae	leaf	light	PRJNA397336
SRR5918263	K_fedtschenkoi_026	K_fedtschenkoi	Crassulaceae	leaf	light	PRJNA397336
SRR5918264	K_fedtschenkoi_027	K_fedtschenkoi	Crassulaceae	leaf	light	PRJNA397336
SRR5918265	K_fedtschenkoi_028	K_fedtschenkoi	Crassulaceae	leaf	light	PRJNA397336
SRR5918266	K_fedtschenkoi_029	K_fedtschenkoi	Crassulaceae	leaf	light	PRJNA397336
SRR5918267	K_fedtschenkoi_030	K_fedtschenkoi	Crassulaceae	leaf	light	PRJNA397336
SRR5918268	K_fedtschenkoi_031	K_fedtschenkoi	Crassulaceae	leaf	light	PRJNA397336
SRR5918269	K_fedtschenkoi_032	K_fedtschenkoi	Crassulaceae	leaf	light	PRJNA397336
SRR5918270	K_fedtschenkoi_033	K_fedtschenkoi	Crassulaceae	flower	healthy	PRJNA397336
SRR5918271	K_fedtschenkoi_034	K_fedtschenkoi	Crassulaceae	flower	healthy	PRJNA397336
SRR5918272	K_fedtschenkoi_035	K_fedtschenkoi	Crassulaceae	flower	healthy	PRJNA397336
SRR5918273	K_fedtschenkoi_036	K_fedtschenkoi	Crassulaceae	seedling	healthy	PRJNA397336
SRR5918274	K_fedtschenkoi_037	K_fedtschenkoi	Crassulaceae	stem	healthy	PRJNA397336
SRR5918275	K_fedtschenkoi_038	K_fedtschenkoi	Crassulaceae	leaf	healthy	PRJNA397336
SRR5918276	K_fedtschenkoi_039	K_fedtschenkoi	Crassulaceae	leaf	healthy	PRJNA397336
SRR5918277	K_fedtschenkoi_040	K_fedtschenkoi	Crassulaceae	leaf	light	PRJNA397336
SRR5918278	K_fedtschenkoi_041	K_fedtschenkoi	Crassulaceae	leaf	light	PRJNA397336
SRR5918279	K_fedtschenkoi_042	K_fedtschenkoi	Crassulaceae	leaf	healthy	PRJNA397336
SRR5918280	K_fedtschenkoi_043	K_fedtschenkoi	Crassulaceae	leaf	light	PRJNA397336
SRR5918281	K_fedtschenkoi_044	K_fedtschenkoi	Crassulaceae	leaf	light	PRJNA397336
SRR5918282	K_fedtschenkoi_045	K_fedtschenkoi	Crassulaceae	leaf	light	PRJNA397336
SRR5918283	K_fedtschenkoi_046	K_fedtschenkoi	Crassulaceae	leaf	light	PRJNA397336
SRR5918284	K_fedtschenkoi_047	K_fedtschenkoi	Crassulaceae	leaf	light	PRJNA397336
SRR5918285	K_fedtschenkoi_048	K_fedtschenkoi	Crassulaceae	stem	healthy	PRJNA397336
SRR10251169	L_siceraria_001	L_siceraria	Cucurbitaceae	root	healthy	PRJNA576654
SRR10251174	L_siceraria_002	L_siceraria	Cucurbitaceae	leaf	healthy	PRJNA576654
SRR10251178	L_siceraria_003	L_siceraria	Cucurbitaceae	fruit	healthy	PRJNA576654
SRR10251179	L_siceraria_004	L_siceraria	Cucurbitaceae	stem	healthy	PRJNA576654
SRR5590270	L_siceraria_005	L_siceraria	Cucurbitaceae	flower	healthy	PRJNA387615
SRR5590271	L_siceraria_006	L_siceraria	Cucurbitaceae	fruit	healthy	PRJNA387615
SRR5590272	L_siceraria_007	L_siceraria	Cucurbitaceae	leaf	healthy	PRJNA387615
SRR5590273	L_siceraria_008	L_siceraria	Cucurbitaceae	root	healthy	PRJNA387615
SRR5590274	L_siceraria_009	L_siceraria	Cucurbitaceae	stem	healthy	PRJNA387615
SRR5405130	M_acuminata_001	M_acuminata	Musaceae	fruit	healthy	PRJNA381300
SRR6320531	M_acuminata_001	M_acuminata	Musaceae	fruit	healthy	PRJNA381300
SRR5405131	M_acuminata_002	M_acuminata	Musaceae	fruit	healthy	PRJNA381300
SRR6320446	M_acuminata_002	M_acuminata	Musaceae	fruit	healthy	PRJNA381300
SRR5405132	M_acuminata_003	M_acuminata	Musaceae	fruit	healthy	PRJNA381300
SRR6320447	M_acuminata_003	M_acuminata	Musaceae	fruit	healthy	PRJNA381300
SRR5405133	M_acuminata_004	M_acuminata	Musaceae	fruit	healthy	PRJNA381300
SRR6320444	M_acuminata_004	M_acuminata	Musaceae	fruit	healthy	PRJNA381300
SRR5405134	M_acuminata_005	M_acuminata	Musaceae	fruit	healthy	PRJNA381300
SRR5405135	M_acuminata_005	M_acuminata	Musaceae	fruit	healthy	PRJNA381300
SRR5405136	M_acuminata_006	M_acuminata	Musaceae	fruit	healthy	PRJNA381300
SRR6320445	M_acuminata_006	M_acuminata	Musaceae	fruit	healthy	PRJNA381300
SRR5405137	M_acuminata_007	M_acuminata	Musaceae	fruit	healthy	PRJNA381300
SRR6320442	M_acuminata_007	M_acuminata	Musaceae	fruit	healthy	PRJNA381300
SRR5405138	M_acuminata_008	M_acuminata	Musaceae	fruit	healthy	PRJNA381300
SRR5405139	M_acuminata_008	M_acuminata	Musaceae	fruit	healthy	PRJNA381300
SRR5405140	M_acuminata_009	M_acuminata	Musaceae	leaf	healthy	PRJNA381300
SRR5405141	M_acuminata_009	M_acuminata	Musaceae	leaf	healthy	PRJNA381300
SRR6320438	M_acuminata_010	M_acuminata	Musaceae	leaf	healthy	PRJNA381300
SRR6320441	M_acuminata_010	M_acuminata	Musaceae	leaf	healthy	PRJNA381300
SRR6320439	M_acuminata_011	M_acuminata	Musaceae	leaf	healthy	PRJNA381300
SRR6320573	M_acuminata_011	M_acuminata	Musaceae	leaf	healthy	PRJNA381300
SRR6320440	M_acuminata_012	M_acuminata	Musaceae	leaf	healthy	PRJNA381300
SRR6320443	M_acuminata_012	M_acuminata	Musaceae	leaf	healthy	PRJNA381300
SRR5877207	M_acuminata_013	M_acuminata	Musaceae	fruit	healthy	PRJNA394594
SRR5877208	M_acuminata_013	M_acuminata	Musaceae	fruit	healthy	PRJNA394594
SRR5877209	M_acuminata_014	M_acuminata	Musaceae	fruit	healthy	PRJNA394594
SRR5877210	M_acuminata_014	M_acuminata	Musaceae	fruit	healthy	PRJNA394594
SRR5877211	M_acuminata_015	M_acuminata	Musaceae	seedling	healthy	PRJNA394594
SRR5877212	M_acuminata_015	M_acuminata	Musaceae	seedling	healthy	PRJNA394594
SRR5877213	M_acuminata_016	M_acuminata	Musaceae	seedling	cold	PRJNA394594
SRR5877214	M_acuminata_016	M_acuminata	Musaceae	seedling	cold	PRJNA394594
SRR5877215	M_acuminata_017	M_acuminata	Musaceae	seedling	other	PRJNA394594
SRR5877216	M_acuminata_017	M_acuminata	Musaceae	seedling	other	PRJNA394594
SRR5877217	M_acuminata_018	M_acuminata	Musaceae	seedling	healthy	PRJNA394594
SRR5877222	M_acuminata_018	M_acuminata	Musaceae	seedling	healthy	PRJNA394594
SRR5877218	M_acuminata_019	M_acuminata	Musaceae	seedling	salt	PRJNA394594
SRR5877219	M_acuminata_019	M_acuminata	Musaceae	seedling	salt	PRJNA394594
SRR5877220	M_acuminata_020	M_acuminata	Musaceae	seedling	other	PRJNA394594
SRR5877221	M_acuminata_020	M_acuminata	Musaceae	seedling	other	PRJNA394594
SRR5877223	M_acuminata_021	M_acuminata	Musaceae	seedling	healthy	PRJNA394594
SRR5877224	M_acuminata_021	M_acuminata	Musaceae	seedling	healthy	PRJNA394594
SRR5877225	M_acuminata_022	M_acuminata	Musaceae	fruit	healthy	PRJNA394594
SRR5877226	M_acuminata_022	M_acuminata	Musaceae	fruit	healthy	PRJNA394594
SRR5877227	M_acuminata_023	M_acuminata	Musaceae	fruit	healthy	PRJNA394594
SRR5877228	M_acuminata_023	M_acuminata	Musaceae	fruit	healthy	PRJNA394594
SRR5877229	M_acuminata_024	M_acuminata	Musaceae	fruit	healthy	PRJNA394594
SRR5877230	M_acuminata_024	M_acuminata	Musaceae	fruit	healthy	PRJNA394594
SRR5877231	M_acuminata_025	M_acuminata	Musaceae	fruit	healthy	PRJNA394594
SRR5877232	M_acuminata_025	M_acuminata	Musaceae	fruit	healthy	PRJNA394594
SRR5877233	M_acuminata_026	M_acuminata	Musaceae	seedling	salt	PRJNA394594
SRR5877234	M_acuminata_026	M_acuminata	Musaceae	seedling	salt	PRJNA394594
SRR5877235	M_acuminata_027	M_acuminata	Musaceae	fruit	healthy	PRJNA394594
SRR5877236	M_acuminata_027	M_acuminata	Musaceae	fruit	healthy	PRJNA394594
SRR5877237	M_acuminata_028	M_acuminata	Musaceae	root	healthy	PRJNA394594
SRR5877238	M_acuminata_028	M_acuminata	Musaceae	root	healthy	PRJNA394594
SRR5877239	M_acuminata_029	M_acuminata	Musaceae	root	healthy	PRJNA394594
SRR5877240	M_acuminata_029	M_acuminata	Musaceae	root	healthy	PRJNA394594
SRR5877241	M_acuminata_030	M_acuminata	Musaceae	fruit	healthy	PRJNA394594
SRR5877242	M_acuminata_030	M_acuminata	Musaceae	fruit	healthy	PRJNA394594
SRR5877243	M_acuminata_031	M_acuminata	Musaceae	fruit	healthy	PRJNA394594
SRR5877244	M_acuminata_031	M_acuminata	Musaceae	fruit	healthy	PRJNA394594
SRR5877245	M_acuminata_032	M_acuminata	Musaceae	fruit	healthy	PRJNA394594
SRR5877246	M_acuminata_032	M_acuminata	Musaceae	fruit	healthy	PRJNA394594
SRR5958093	M_acuminata_033	M_acuminata	Musaceae	leaf	healthy	PRJNA399649
SRR5958094	M_acuminata_034	M_acuminata	Musaceae	leaf	other	PRJNA399649
SRR5958095	M_acuminata_035	M_acuminata	Musaceae	root	healthy	PRJNA399649
SRR5958096	M_acuminata_036	M_acuminata	Musaceae	root	other	PRJNA399649
SRR4292572	M_acuminata_037	M_acuminata	Musaceae	leaf	cold	PRJNA343716
SRR4292573	M_acuminata_037	M_acuminata	Musaceae	leaf	cold	PRJNA343716
SRR4292574	M_acuminata_038	M_acuminata	Musaceae	leaf	healthy	PRJNA343716
SRR4292575	M_acuminata_038	M_acuminata	Musaceae	leaf	healthy	PRJNA343716
SRR4292576	M_acuminata_039	M_acuminata	Musaceae	leaf	other	PRJNA343716
SRR4292578	M_acuminata_039	M_acuminata	Musaceae	leaf	other	PRJNA343716
SRR4292579	M_acuminata_040	M_acuminata	Musaceae	leaf	salt	PRJNA343716
SRR4292580	M_acuminata_040	M_acuminata	Musaceae	leaf	salt	PRJNA343716
SRR4292581	M_acuminata_041	M_acuminata	Musaceae	leaf	healthy	PRJNA343716
SRR4292582	M_acuminata_041	M_acuminata	Musaceae	leaf	healthy	PRJNA343716
SRR4292584	M_acuminata_042	M_acuminata	Musaceae	leaf	other	PRJNA343716
SRR4292585	M_acuminata_042	M_acuminata	Musaceae	leaf	other	PRJNA343716
SRR4292586	M_acuminata_043	M_acuminata	Musaceae	leaf	salt	PRJNA343716
SRR4292587	M_acuminata_043	M_acuminata	Musaceae	leaf	salt	PRJNA343716
SRR4292588	M_acuminata_044	M_acuminata	Musaceae	leaf	cold	PRJNA343716
SRR4292589	M_acuminata_044	M_acuminata	Musaceae	leaf	cold	PRJNA343716
SRR3474213	M_acuminata_045	M_acuminata	Musaceae	leaf	healthy	PRJNA320030
SRR3481070	M_acuminata_046	M_acuminata	Musaceae	leaf	heat	PRJNA320030
SRR3484437	M_acuminata_047	M_acuminata	Musaceae	leaf	heat	PRJNA320030
SRR3499227	M_acuminata_048	M_acuminata	Musaceae	leaf	heat	PRJNA320030
SRR3499241	M_acuminata_xx	M_acuminata_xx	Musaceae	leaf	heat	PRJNA320030
SRR3509294	M_acuminata_xy	M_acuminata_xy	Musaceae	leaf	heat	PRJNA320030
SRR1582384	M_acuminata_049	M_acuminata	Musaceae	leaf	cold	PRJNA261638
SRR1582385	M_acuminata_050	M_acuminata	Musaceae	leaf	cold	PRJNA261638
SRR1582386	M_acuminata_051	M_acuminata	Musaceae	leaf	healthy	PRJNA261638
SRR1582387	M_acuminata_052	M_acuminata	Musaceae	leaf	healthy	PRJNA261638
SRR1582388	M_acuminata_053	M_acuminata	Musaceae	leaf	cold	PRJNA261638
SRR1582389	M_acuminata_054	M_acuminata	Musaceae	leaf	cold	PRJNA261638
SRR1339902	M_acuminata_055	M_acuminata	Musaceae	root	salt	PRJNA246442
SRR1339507	M_acuminata_056	M_acuminata	Musaceae	root	healthy	PRJNA246442
SRR8661622	M_acuminata_057	M_acuminata	Musaceae	root	healthy	PRJNA524268
SRR8661623	M_acuminata_057	M_acuminata	Musaceae	root	healthy	PRJNA524268
SRR8661624	M_acuminata_057	M_acuminata	Musaceae	root	healthy	PRJNA524268
SRR8661625	M_acuminata_058	M_acuminata	Musaceae	root	healthy	PRJNA524268
SRR8661636	M_acuminata_058	M_acuminata	Musaceae	root	healthy	PRJNA524268
SRR8661637	M_acuminata_058	M_acuminata	Musaceae	root	healthy	PRJNA524268
SRR8661626	M_acuminata_059	M_acuminata	Musaceae	root	healthy	PRJNA524268
SRR8661627	M_acuminata_059	M_acuminata	Musaceae	root	healthy	PRJNA524268
SRR8661634	M_acuminata_059	M_acuminata	Musaceae	root	healthy	PRJNA524268
SRR8661628	M_acuminata_060	M_acuminata	Musaceae	root	biotic	PRJNA524268
SRR8661629	M_acuminata_060	M_acuminata	Musaceae	root	biotic	PRJNA524268
SRR8661631	M_acuminata_060	M_acuminata	Musaceae	root	biotic	PRJNA524268
SRR8661630	M_acuminata_061	M_acuminata	Musaceae	root	biotic	PRJNA524268
SRR8661632	M_acuminata_061	M_acuminata	Musaceae	root	biotic	PRJNA524268
SRR8661633	M_acuminata_061	M_acuminata	Musaceae	root	biotic	PRJNA524268
SRR8661635	M_acuminata_062	M_acuminata	Musaceae	root	healthy	PRJNA524268
SRR8661644	M_acuminata_062	M_acuminata	Musaceae	root	healthy	PRJNA524268
SRR8661645	M_acuminata_062	M_acuminata	Musaceae	root	healthy	PRJNA524268
SRR8661638	M_acuminata_063	M_acuminata	Musaceae	root	biotic	PRJNA524268
SRR8661639	M_acuminata_063	M_acuminata	Musaceae	root	biotic	PRJNA524268
SRR8661641	M_acuminata_063	M_acuminata	Musaceae	root	biotic	PRJNA524268
SRR8661640	M_acuminata_064	M_acuminata	Musaceae	root	biotic	PRJNA524268
SRR8661642	M_acuminata_064	M_acuminata	Musaceae	root	biotic	PRJNA524268
SRR8661643	M_acuminata_064	M_acuminata	Musaceae	root	biotic	PRJNA524268
SRR12223529	M_baccata_001	M_baccata	Rosaceae	root	healthy	PRJNA645374
SRR12223530	M_baccata_001	M_baccata	Rosaceae	root	healthy	PRJNA645374
SRR12223531	M_baccata_001	M_baccata	Rosaceae	root	healthy	PRJNA645374
SRR12223525	M_baccata_002	M_baccata	Rosaceae	root	salt	PRJNA645374
SRR12223526	M_baccata_002	M_baccata	Rosaceae	root	salt	PRJNA645374
SRR12223527	M_baccata_002	M_baccata	Rosaceae	root	salt	PRJNA645374
SRR12223522	M_baccata_003	M_baccata	Rosaceae	root	salt	PRJNA645374
SRR12223523	M_baccata_003	M_baccata	Rosaceae	root	salt	PRJNA645374
SRR12223524	M_baccata_003	M_baccata	Rosaceae	root	salt	PRJNA645374
SRR12223519	M_baccata_004	M_baccata	Rosaceae	root	salt	PRJNA645374
SRR12223520	M_baccata_004	M_baccata	Rosaceae	root	salt	PRJNA645374
SRR12223521	M_baccata_004	M_baccata	Rosaceae	root	salt	PRJNA645374
SRR3744950	M_domestica_001	M_domestica	Rosaceae	root	other	PRJNA327898
SRR3744951	M_domestica_001	M_domestica	Rosaceae	root	other	PRJNA327898
SRR3744952	M_domestica_002	M_domestica	Rosaceae	root	healthy	PRJNA327898
SRR3744953	M_domestica_002	M_domestica	Rosaceae	root	healthy	PRJNA327898
SRR3629818	M_esculenta_001	M_esculenta	Euphorbiaceae	leaf	healthy	PRJNA324539
SRR3629835	M_esculenta_001	M_esculenta	Euphorbiaceae	leaf	healthy	PRJNA324539
SRR3629853	M_esculenta_001	M_esculenta	Euphorbiaceae	leaf	healthy	PRJNA324539
SRR3629819	M_esculenta_002	M_esculenta	Euphorbiaceae	leaf	healthy	PRJNA324539
SRR3629837	M_esculenta_002	M_esculenta	Euphorbiaceae	leaf	healthy	PRJNA324539
SRR3629854	M_esculenta_002	M_esculenta	Euphorbiaceae	leaf	healthy	PRJNA324539
SRR3629821	M_esculenta_003	M_esculenta	Euphorbiaceae	other	healthy	PRJNA324539
SRR3629838	M_esculenta_003	M_esculenta	Euphorbiaceae	other	healthy	PRJNA324539
SRR3629856	M_esculenta_003	M_esculenta	Euphorbiaceae	other	healthy	PRJNA324539
SRR3629822	M_esculenta_004	M_esculenta	Euphorbiaceae	other	healthy	PRJNA324539
SRR3629840	M_esculenta_004	M_esculenta	Euphorbiaceae	other	healthy	PRJNA324539
SRR3629858	M_esculenta_004	M_esculenta	Euphorbiaceae	other	healthy	PRJNA324539
SRR3629824	M_esculenta_005	M_esculenta	Euphorbiaceae	stem	healthy	PRJNA324539
SRR3629842	M_esculenta_005	M_esculenta	Euphorbiaceae	stem	healthy	PRJNA324539
SRR3629859	M_esculenta_005	M_esculenta	Euphorbiaceae	stem	healthy	PRJNA324539
SRR3629825	M_esculenta_006	M_esculenta	Euphorbiaceae	root	healthy	PRJNA324539
SRR3629843	M_esculenta_006	M_esculenta	Euphorbiaceae	root	healthy	PRJNA324539
SRR3629827	M_esculenta_007	M_esculenta	Euphorbiaceae	root	healthy	PRJNA324539
SRR3629845	M_esculenta_007	M_esculenta	Euphorbiaceae	root	healthy	PRJNA324539
SRR3629861	M_esculenta_007	M_esculenta	Euphorbiaceae	root	healthy	PRJNA324539
SRR3629829	M_esculenta_008	M_esculenta	Euphorbiaceae	other	healthy	PRJNA324539
SRR3629847	M_esculenta_008	M_esculenta	Euphorbiaceae	other	healthy	PRJNA324539
SRR3629862	M_esculenta_008	M_esculenta	Euphorbiaceae	other	healthy	PRJNA324539
SRR3629830	M_esculenta_009	M_esculenta	Euphorbiaceae	other	healthy	PRJNA324539
SRR3629848	M_esculenta_009	M_esculenta	Euphorbiaceae	other	healthy	PRJNA324539
SRR3629864	M_esculenta_009	M_esculenta	Euphorbiaceae	other	healthy	PRJNA324539
SRR3629832	M_esculenta_010	M_esculenta	Euphorbiaceae	stem	healthy	PRJNA324539
SRR3629850	M_esculenta_010	M_esculenta	Euphorbiaceae	stem	healthy	PRJNA324539
SRR3629865	M_esculenta_010	M_esculenta	Euphorbiaceae	stem	healthy	PRJNA324539
SRR3629834	M_esculenta_011	M_esculenta	Euphorbiaceae	stem	healthy	PRJNA324539
SRR3629851	M_esculenta_011	M_esculenta	Euphorbiaceae	stem	healthy	PRJNA324539
SRR3629867	M_esculenta_011	M_esculenta	Euphorbiaceae	stem	healthy	PRJNA324539
SRR5140222	M_esculenta_012	M_esculenta	Euphorbiaceae	leaf	healthy	PRJNA359998
SRR5140223	M_esculenta_013	M_esculenta	Euphorbiaceae	stem	healthy	PRJNA359998
SRR5140224	M_esculenta_014	M_esculenta	Euphorbiaceae	root	healthy	PRJNA359998
SRR5140225	M_esculenta_015	M_esculenta	Euphorbiaceae	leaf	healthy	PRJNA359998
SRR5140226	M_esculenta_016	M_esculenta	Euphorbiaceae	root	healthy	PRJNA359998
SRR5140227	M_esculenta_017	M_esculenta	Euphorbiaceae	root	healthy	PRJNA359998
SRR5140228	M_esculenta_018	M_esculenta	Euphorbiaceae	root	healthy	PRJNA359998
SRR5140229	M_esculenta_019	M_esculenta	Euphorbiaceae	stem	healthy	PRJNA359998
SRR5140230	M_esculenta_020	M_esculenta	Euphorbiaceae	leaf	healthy	PRJNA359998
SRR5140231	M_esculenta_021	M_esculenta	Euphorbiaceae	root	healthy	PRJNA359998
SRR5140232	M_esculenta_022	M_esculenta	Euphorbiaceae	root	healthy	PRJNA359998
SRR5140233	M_esculenta_023	M_esculenta	Euphorbiaceae	root	healthy	PRJNA359998
SRR5140234	M_esculenta_024	M_esculenta	Euphorbiaceae	leaf	healthy	PRJNA359998
SRR5140235	M_esculenta_025	M_esculenta	Euphorbiaceae	leaf	other	PRJNA359998
SRR5140236	M_esculenta_026	M_esculenta	Euphorbiaceae	leaf	other	PRJNA359998
SRR5140237	M_esculenta_027	M_esculenta	Euphorbiaceae	leaf	healthy	PRJNA359998
SRR5140238	M_esculenta_028	M_esculenta	Euphorbiaceae	leaf	other	PRJNA359998
SRR5140239	M_esculenta_029	M_esculenta	Euphorbiaceae	leaf	other	PRJNA359998
SRR5140240	M_esculenta_030	M_esculenta	Euphorbiaceae	leaf	healthy	PRJNA359998
SRR5140241	M_esculenta_031	M_esculenta	Euphorbiaceae	leaf	other	PRJNA359998
SRR5140242	M_esculenta_032	M_esculenta	Euphorbiaceae	leaf	other	PRJNA359998
SRR5140243	M_esculenta_033	M_esculenta	Euphorbiaceae	root	other	PRJNA359998
SRR5140244	M_esculenta_034	M_esculenta	Euphorbiaceae	root	other	PRJNA359998
SRR5140245	M_esculenta_035	M_esculenta	Euphorbiaceae	root	other	PRJNA359998
SRR13313987	M_esculenta_036	M_esculenta	Euphorbiaceae	leaf	other	PRJNA688032
SRR13313988	M_esculenta_036	M_esculenta	Euphorbiaceae	leaf	other	PRJNA688032
SRR13313989	M_esculenta_036	M_esculenta	Euphorbiaceae	leaf	other	PRJNA688032
SRR13313990	M_esculenta_037	M_esculenta	Euphorbiaceae	leaf	biotic	PRJNA688032
SRR13313991	M_esculenta_037	M_esculenta	Euphorbiaceae	leaf	biotic	PRJNA688032
SRR13313992	M_esculenta_037	M_esculenta	Euphorbiaceae	leaf	biotic	PRJNA688032
SRR13313993	M_esculenta_038	M_esculenta	Euphorbiaceae	leaf	biotic	PRJNA688032
SRR13313994	M_esculenta_038	M_esculenta	Euphorbiaceae	leaf	biotic	PRJNA688032
SRR13313995	M_esculenta_038	M_esculenta	Euphorbiaceae	leaf	biotic	PRJNA688032
SRR1594297	M_esculenta_039	M_esculenta	Euphorbiaceae	leaf	healthy	PRJNA262667
SRR1594324	M_esculenta_039	M_esculenta	Euphorbiaceae	leaf	healthy	PRJNA262667
SRR1594342	M_esculenta_039	M_esculenta	Euphorbiaceae	leaf	healthy	PRJNA262667
SRR1594298	M_esculenta_040	M_esculenta	Euphorbiaceae	leaf	healthy	PRJNA262667
SRR1594325	M_esculenta_040	M_esculenta	Euphorbiaceae	leaf	healthy	PRJNA262667
SRR1594343	M_esculenta_040	M_esculenta	Euphorbiaceae	leaf	healthy	PRJNA262667
SRR1594299	M_esculenta_041	M_esculenta	Euphorbiaceae	leaf	healthy	PRJNA262667
SRR1594326	M_esculenta_041	M_esculenta	Euphorbiaceae	leaf	healthy	PRJNA262667
SRR1594344	M_esculenta_041	M_esculenta	Euphorbiaceae	leaf	healthy	PRJNA262667
SRR1594300	M_esculenta_042	M_esculenta	Euphorbiaceae	leaf	healthy	PRJNA262667
SRR1594327	M_esculenta_042	M_esculenta	Euphorbiaceae	leaf	healthy	PRJNA262667
SRR1594345	M_esculenta_042	M_esculenta	Euphorbiaceae	leaf	healthy	PRJNA262667
SRR1594301	M_esculenta_043	M_esculenta	Euphorbiaceae	leaf	healthy	PRJNA262667
SRR1594328	M_esculenta_043	M_esculenta	Euphorbiaceae	leaf	healthy	PRJNA262667
SRR1594346	M_esculenta_043	M_esculenta	Euphorbiaceae	leaf	healthy	PRJNA262667
SRR1594302	M_esculenta_044	M_esculenta	Euphorbiaceae	leaf	healthy	PRJNA262667
SRR1594329	M_esculenta_044	M_esculenta	Euphorbiaceae	leaf	healthy	PRJNA262667
SRR1594347	M_esculenta_044	M_esculenta	Euphorbiaceae	leaf	healthy	PRJNA262667
SRR1594303	M_esculenta_045	M_esculenta	Euphorbiaceae	leaf	healthy	PRJNA262667
SRR1594330	M_esculenta_045	M_esculenta	Euphorbiaceae	leaf	healthy	PRJNA262667
SRR1594348	M_esculenta_045	M_esculenta	Euphorbiaceae	leaf	healthy	PRJNA262667
SRR1594304	M_esculenta_046	M_esculenta	Euphorbiaceae	leaf	healthy	PRJNA262667
SRR1594331	M_esculenta_046	M_esculenta	Euphorbiaceae	leaf	healthy	PRJNA262667
SRR1594349	M_esculenta_046	M_esculenta	Euphorbiaceae	leaf	healthy	PRJNA262667
SRR1594305	M_esculenta_047	M_esculenta	Euphorbiaceae	leaf	healthy	PRJNA262667
SRR1594332	M_esculenta_047	M_esculenta	Euphorbiaceae	leaf	healthy	PRJNA262667
SRR1594350	M_esculenta_047	M_esculenta	Euphorbiaceae	leaf	healthy	PRJNA262667
SRR1594306	M_esculenta_048	M_esculenta	Euphorbiaceae	leaf	light	PRJNA262667
SRR1594315	M_esculenta_048	M_esculenta	Euphorbiaceae	leaf	light	PRJNA262667
SRR1594333	M_esculenta_048	M_esculenta	Euphorbiaceae	leaf	light	PRJNA262667
SRR1594307	M_esculenta_049	M_esculenta	Euphorbiaceae	leaf	light	PRJNA262667
SRR1594316	M_esculenta_049	M_esculenta	Euphorbiaceae	leaf	light	PRJNA262667
SRR1594334	M_esculenta_049	M_esculenta	Euphorbiaceae	leaf	light	PRJNA262667
SRR1594308	M_esculenta_050	M_esculenta	Euphorbiaceae	leaf	light	PRJNA262667
SRR1594317	M_esculenta_050	M_esculenta	Euphorbiaceae	leaf	light	PRJNA262667
SRR1594335	M_esculenta_050	M_esculenta	Euphorbiaceae	leaf	light	PRJNA262667
SRR1594309	M_esculenta_051	M_esculenta	Euphorbiaceae	leaf	light	PRJNA262667
SRR1594318	M_esculenta_051	M_esculenta	Euphorbiaceae	leaf	light	PRJNA262667
SRR1594336	M_esculenta_051	M_esculenta	Euphorbiaceae	leaf	light	PRJNA262667
SRR1594310	M_esculenta_052	M_esculenta	Euphorbiaceae	leaf	light	PRJNA262667
SRR1594319	M_esculenta_052	M_esculenta	Euphorbiaceae	leaf	light	PRJNA262667
SRR1594337	M_esculenta_052	M_esculenta	Euphorbiaceae	leaf	light	PRJNA262667
SRR1594311	M_esculenta_053	M_esculenta	Euphorbiaceae	leaf	light	PRJNA262667
SRR1594320	M_esculenta_053	M_esculenta	Euphorbiaceae	leaf	light	PRJNA262667
SRR1594338	M_esculenta_053	M_esculenta	Euphorbiaceae	leaf	light	PRJNA262667
SRR1594312	M_esculenta_054	M_esculenta	Euphorbiaceae	leaf	light	PRJNA262667
SRR1594321	M_esculenta_054	M_esculenta	Euphorbiaceae	leaf	light	PRJNA262667
SRR1594339	M_esculenta_054	M_esculenta	Euphorbiaceae	leaf	light	PRJNA262667
SRR1594313	M_esculenta_055	M_esculenta	Euphorbiaceae	leaf	light	PRJNA262667
SRR1594322	M_esculenta_055	M_esculenta	Euphorbiaceae	leaf	light	PRJNA262667
SRR1594340	M_esculenta_055	M_esculenta	Euphorbiaceae	leaf	light	PRJNA262667
SRR1594314	M_esculenta_056	M_esculenta	Euphorbiaceae	leaf	light	PRJNA262667
SRR1594323	M_esculenta_056	M_esculenta	Euphorbiaceae	leaf	light	PRJNA262667
SRR1594341	M_esculenta_056	M_esculenta	Euphorbiaceae	leaf	light	PRJNA262667
SRR1027036	M_esculenta_057	M_esculenta	Euphorbiaceae	seedling	healthy	NA
SRR1027037	M_esculenta_058	M_esculenta	Euphorbiaceae	seedling	cold	NA
SRR1027038	M_esculenta_059	M_esculenta	Euphorbiaceae	seedling	cold	NA
SRR1027039	M_esculenta_060	M_esculenta	Euphorbiaceae	seedling	cold	NA
SRR4450254	M_polymorpha_001	M_polymorpha	Marchantiaceae	other	healthy	NA
SRR4450255	M_polymorpha_002	M_polymorpha	Marchantiaceae	other	healthy	NA
SRR4450256	M_polymorpha_003	M_polymorpha	Marchantiaceae	other	healthy	NA
SRR4450257	M_polymorpha_004	M_polymorpha	Marchantiaceae	other	healthy	NA
SRR4450258	M_polymorpha_006	M_polymorpha	Marchantiaceae	other	healthy	NA
SRR4450259	M_polymorpha_007	M_polymorpha	Marchantiaceae	other	healthy	NA
SRR4450260	M_polymorpha_008	M_polymorpha	Marchantiaceae	other	healthy	NA
SRR4450261	M_polymorpha_009	M_polymorpha	Marchantiaceae	other	healthy	NA
SRR4450262	M_polymorpha_010	M_polymorpha	Marchantiaceae	other	healthy	NA
SRR4450263	M_polymorpha_011	M_polymorpha	Marchantiaceae	other	healthy	NA
SRR4450264	M_polymorpha_012	M_polymorpha	Marchantiaceae	other	healthy	NA
SRR4450265	M_polymorpha_013	M_polymorpha	Marchantiaceae	other	healthy	NA
SRR4450266	M_polymorpha_014	M_polymorpha	Marchantiaceae	other	healthy	NA
SRR4450267	M_polymorpha_015	M_polymorpha	Marchantiaceae	other	healthy	NA
SRR4450268	M_polymorpha_016	M_polymorpha	Marchantiaceae	other	healthy	NA
SRR350520	M_truncatula_001	M_truncatula	Fabaceae	root	healthy	PRJNA80163
SRR350519	M_truncatula_002	M_truncatula	Fabaceae	flower	healthy	PRJNA80163
SRR349692	M_truncatula_003	M_truncatula	Fabaceae	flower	healthy	PRJNA80163
SRR350538	M_truncatula_004	M_truncatula	Fabaceae	flower	healthy	PRJNA80163
SRR350518	M_truncatula_005	M_truncatula	Fabaceae	leaf	healthy	PRJNA80163
SRR350521	M_truncatula_006	M_truncatula	Fabaceae	seed	healthy	PRJNA80163
SRR350517	M_truncatula_007	M_truncatula	Fabaceae	root	healthy	PRJNA80163
SRR299098	N_tabacum_013	N_tabacum	Solanaceae	leaf	other	PRJNA143809
SRR6471192	N_tabacum_014	N_tabacum	Solanaceae	leaf	healthy	PRJNA429497
SRR6471191	N_tabacum_014	N_tabacum	Solanaceae	leaf	healthy	PRJNA429497
SRR6471184	N_tabacum_014	N_tabacum	Solanaceae	leaf	healthy	PRJNA429497
SRR6471190	N_tabacum_015	N_tabacum	Solanaceae	leaf	healthy	PRJNA429497
SRR6471189	N_tabacum_015	N_tabacum	Solanaceae	leaf	healthy	PRJNA429497
SRR6471187	N_tabacum_015	N_tabacum	Solanaceae	leaf	healthy	PRJNA429497
SRR6471188	N_tabacum_016	N_tabacum	Solanaceae	leaf	healthy	PRJNA429497
SRR6471186	N_tabacum_016	N_tabacum	Solanaceae	leaf	healthy	PRJNA429497
SRR6471185	N_tabacum_016	N_tabacum	Solanaceae	leaf	healthy	PRJNA429497
SRR6471183	N_tabacum_017	N_tabacum	Solanaceae	leaf	cold	PRJNA429497
SRR6471181	N_tabacum_017	N_tabacum	Solanaceae	leaf	cold	PRJNA429497
SRR6471180	N_tabacum_017	N_tabacum	Solanaceae	leaf	cold	PRJNA429497
SRR6471182	N_tabacum_018	N_tabacum	Solanaceae	leaf	cold	PRJNA429497
SRR6471179	N_tabacum_018	N_tabacum	Solanaceae	leaf	cold	PRJNA429497
SRR6471178	N_tabacum_018	N_tabacum	Solanaceae	leaf	cold	PRJNA429497
SRR5205593	N_tabacum_019	N_tabacum	Solanaceae	leaf	cold	PRJNA368913
SRR5205592	N_tabacum_019	N_tabacum	Solanaceae	leaf	cold	PRJNA368913
SRR5205591	N_tabacum_020	N_tabacum	Solanaceae	leaf	healthy	PRJNA368913
SRR5205590	N_tabacum_020	N_tabacum	Solanaceae	leaf	healthy	PRJNA368913
SRR5205597	N_tabacum_021	N_tabacum	Solanaceae	leaf	cold	PRJNA368913
SRR5205596	N_tabacum_021	N_tabacum	Solanaceae	leaf	cold	PRJNA368913
SRR5205595	N_tabacum_022	N_tabacum	Solanaceae	leaf	healthy	PRJNA368913
SRR5205594	N_tabacum_022	N_tabacum	Solanaceae	leaf	healthy	PRJNA368913
SRR955772	N_tabacum_023	N_tabacum	Solanaceae	leaf	healthy	PRJNA208210
SRR955773	N_tabacum_023	N_tabacum	Solanaceae	leaf	healthy	PRJNA208210
SRR955774	N_tabacum_023	N_tabacum	Solanaceae	leaf	healthy	PRJNA208210
SRR955776	N_tabacum_024	N_tabacum	Solanaceae	root	healthy	PRJNA208210
SRR955777	N_tabacum_024	N_tabacum	Solanaceae	root	healthy	PRJNA208210
SRR955778	N_tabacum_024	N_tabacum	Solanaceae	root	healthy	PRJNA208210
SRR955761	N_tabacum_025	N_tabacum	Solanaceae	leaf	healthy	PRJNA208209
SRR955762	N_tabacum_025	N_tabacum	Solanaceae	leaf	healthy	PRJNA208209
SRR955763	N_tabacum_025	N_tabacum	Solanaceae	leaf	healthy	PRJNA208209
SRR955765	N_tabacum_026	N_tabacum	Solanaceae	root	healthy	PRJNA208209
SRR955766	N_tabacum_026	N_tabacum	Solanaceae	root	healthy	PRJNA208209
SRR955767	N_tabacum_026	N_tabacum	Solanaceae	root	healthy	PRJNA208209
SRR1199063	N_tabacum_027	N_tabacum	Solanaceae	fruit	healthy	PRJNA208209
SRR1199066	N_tabacum_027	N_tabacum	Solanaceae	fruit	healthy	PRJNA208209
SRR1199068	N_tabacum_027	N_tabacum	Solanaceae	fruit	healthy	PRJNA208209
SRR1199069	N_tabacum_028	N_tabacum	Solanaceae	flower	healthy	PRJNA208209
SRR1199070	N_tabacum_028	N_tabacum	Solanaceae	flower	healthy	PRJNA208209
SRR1199071	N_tabacum_028	N_tabacum	Solanaceae	flower	healthy	PRJNA208209
SRR1199072	N_tabacum_029	N_tabacum	Solanaceae	leaf	healthy	PRJNA208209
SRR1199073	N_tabacum_029	N_tabacum	Solanaceae	leaf	healthy	PRJNA208209
SRR1199074	N_tabacum_029	N_tabacum	Solanaceae	leaf	healthy	PRJNA208209
SRR1199121	N_tabacum_030	N_tabacum	Solanaceae	root	healthy	PRJNA208209
SRR1199122	N_tabacum_030	N_tabacum	Solanaceae	root	healthy	PRJNA208209
SRR1199123	N_tabacum_030	N_tabacum	Solanaceae	root	healthy	PRJNA208209
SRR1199124	N_tabacum_031	N_tabacum	Solanaceae	flower	healthy	PRJNA208209
SRR1199125	N_tabacum_031	N_tabacum	Solanaceae	flower	healthy	PRJNA208209
SRR1199127	N_tabacum_032	N_tabacum	Solanaceae	leaf	healthy	PRJNA208209
SRR1199128	N_tabacum_032	N_tabacum	Solanaceae	leaf	healthy	PRJNA208209
SRR1199129	N_tabacum_032	N_tabacum	Solanaceae	leaf	healthy	PRJNA208209
SRR1199130	N_tabacum_033	N_tabacum	Solanaceae	stem	healthy	PRJNA208209
SRR1199132	N_tabacum_033	N_tabacum	Solanaceae	stem	healthy	PRJNA208209
SRR1199135	N_tabacum_033	N_tabacum	Solanaceae	stem	healthy	PRJNA208209
SRR1199197	N_tabacum_034	N_tabacum	Solanaceae	flower	healthy	PRJNA208209
SRR1199198	N_tabacum_034	N_tabacum	Solanaceae	flower	healthy	PRJNA208209
SRR1199199	N_tabacum_034	N_tabacum	Solanaceae	flower	healthy	PRJNA208209
SRR1199200	N_tabacum_035	N_tabacum	Solanaceae	leaf	healthy	PRJNA208209
SRR1199202	N_tabacum_035	N_tabacum	Solanaceae	leaf	healthy	PRJNA208209
SRR1199203	N_tabacum_035	N_tabacum	Solanaceae	leaf	healthy	PRJNA208209
SRR4473639	O_europaea_001	O_europaea	Oleaceae	leaf	healthy	PRJNA350601
SRR4473641	O_europaea_002	O_europaea	Oleaceae	fruit	healthy	PRJNA350601
SRR4473642	O_europaea_003	O_europaea	Oleaceae	stem	healthy	PRJNA350601
SRR4473643	O_europaea_004	O_europaea	Oleaceae	stem	healthy	PRJNA350601
SRR4473644	O_europaea_005	O_europaea	Oleaceae	leaf	healthy	PRJNA350601
SRR4473645	O_europaea_006	O_europaea	Oleaceae	fruit	healthy	PRJNA350601
SRR4473646	O_europaea_007	O_europaea	Oleaceae	stem	healthy	PRJNA350601
ERR266227	O_sativa_001	O_sativa	Poaceae	leaf	salt	PRJEB1856
ERR266224	O_sativa_001	O_sativa	Poaceae	leaf	salt	PRJEB1856
ERR266221	O_sativa_001	O_sativa	Poaceae	leaf	salt	PRJEB1856
SRR1761528	O_sativa_001	O_sativa	Poaceae	leaf	drought	NA
SRR1761529	O_sativa_001	O_sativa	Poaceae	leaf	drought	NA
ERR266222	O_sativa_002	O_sativa	Poaceae	leaf	healthy	PRJEB1856
SRR1761530	O_sativa_002	O_sativa	Poaceae	leaf	healthy	NA
SRR1761531	O_sativa_002	O_sativa	Poaceae	leaf	healthy	NA
ERR266225	O_sativa_003	O_sativa	Poaceae	leaf	healthy	PRJEB1856
ERR266234	O_sativa_003	O_sativa	Poaceae	leaf	healthy	PRJEB1856
ERR266232	O_sativa_003	O_sativa	Poaceae	leaf	healthy	PRJEB1856
SRR352184	O_sativa_003	O_sativa	Poaceae	leaf	healthy	NA
SRR352211	O_sativa_003	O_sativa	Poaceae	leaf	healthy	NA
ERR266238	O_sativa_004	O_sativa	Poaceae	leaf	salt	PRJEB1856
ERR266226	O_sativa_004	O_sativa	Poaceae	leaf	salt	PRJEB1856
ERR266231	O_sativa_004	O_sativa	Poaceae	leaf	salt	PRJEB1856
SRR352187	O_sativa_004	O_sativa	Poaceae	flower	healthy	NA
ERR266233	O_sativa_005	O_sativa	Poaceae	leaf	healthy	PRJEB1856
ERR266230	O_sativa_005	O_sativa	Poaceae	leaf	healthy	PRJEB1856
SRR352189	O_sativa_005	O_sativa	Poaceae	flower	healthy	NA
ERR266237	O_sativa_006	O_sativa	Poaceae	leaf	salt	PRJEB1856
ERR266236	O_sativa_006	O_sativa	Poaceae	leaf	salt	PRJEB1856
ERR266235	O_sativa_006	O_sativa	Poaceae	leaf	salt	PRJEB1856
SRR352190	O_sativa_006	O_sativa	Poaceae	flower	healthy	NA
SRR352192	O_sativa_007	O_sativa	Poaceae	flower	healthy	NA
SRR352194	O_sativa_008	O_sativa	Poaceae	seed	healthy	NA
SRR352204	O_sativa_009	O_sativa	Poaceae	seed	healthy	NA
SRR352206	O_sativa_010	O_sativa	Poaceae	seed	healthy	NA
SRR352209	O_sativa_010	O_sativa	Poaceae	seed	healthy	NA
SRR352207	O_sativa_011	O_sativa	Poaceae	seed	healthy	NA
ERR348354	O_sativa_101	O_sativa	Poaceae	other	healthy	PRJEB4671
ERR348358	O_sativa_101	O_sativa	Poaceae	other	healthy	PRJEB4671
ERR348361	O_sativa_101	O_sativa	Poaceae	other	healthy	PRJEB4671
ERR348348	O_sativa_102	O_sativa	Poaceae	other	healthy	PRJEB4671
ERR348362	O_sativa_102	O_sativa	Poaceae	other	healthy	PRJEB4671
ERR348375	O_sativa_102	O_sativa	Poaceae	other	healthy	PRJEB4671
ERR348351	O_sativa_103	O_sativa	Poaceae	other	healthy	PRJEB4671
ERR348368	O_sativa_103	O_sativa	Poaceae	other	healthy	PRJEB4671
ERR348371	O_sativa_103	O_sativa	Poaceae	other	healthy	PRJEB4671
ERR348374	O_sativa_104	O_sativa	Poaceae	other	healthy	PRJEB4671
ERR348376	O_sativa_104	O_sativa	Poaceae	other	healthy	PRJEB4671
ERR348347	O_sativa_105	O_sativa	Poaceae	other	healthy	PRJEB4671
ERR348349	O_sativa_105	O_sativa	Poaceae	other	healthy	PRJEB4671
ERR348367	O_sativa_105	O_sativa	Poaceae	other	healthy	PRJEB4671
ERR348359	O_sativa_106	O_sativa	Poaceae	other	salt	PRJEB4671
ERR348360	O_sativa_106	O_sativa	Poaceae	other	salt	PRJEB4671
ERR348363	O_sativa_106	O_sativa	Poaceae	other	salt	PRJEB4671
ERR348352	O_sativa_107	O_sativa	Poaceae	other	salt	PRJEB4671
ERR348370	O_sativa_107	O_sativa	Poaceae	other	salt	PRJEB4671
ERR348372	O_sativa_107	O_sativa	Poaceae	other	salt	PRJEB4671
ERR348350	O_sativa_108	O_sativa	Poaceae	other	salt	PRJEB4671
ERR348356	O_sativa_108	O_sativa	Poaceae	other	salt	PRJEB4671
ERR348357	O_sativa_108	O_sativa	Poaceae	other	salt	PRJEB4671
ERR348364	O_sativa_109	O_sativa	Poaceae	other	salt	PRJEB4671
ERR348365	O_sativa_109	O_sativa	Poaceae	other	salt	PRJEB4671
ERR348373	O_sativa_109	O_sativa	Poaceae	other	salt	PRJEB4671
ERR348353	O_sativa_110	O_sativa	Poaceae	other	salt	PRJEB4671
ERR348366	O_sativa_110	O_sativa	Poaceae	other	salt	PRJEB4671
ERR348369	O_sativa_110	O_sativa	Poaceae	other	salt	PRJEB4671
ERR2061590	O_sativa_201	O_sativa	Poaceae	leaf	healthy	PRJEB22031
ERR2061591	O_sativa_201	O_sativa	Poaceae	leaf	healthy	PRJEB22031
ERR2061592	O_sativa_201	O_sativa	Poaceae	leaf	healthy	PRJEB22031
ERR2061593	O_sativa_202	O_sativa	Poaceae	leaf	cold	PRJEB22031
ERR2061594	O_sativa_202	O_sativa	Poaceae	leaf	cold	PRJEB22031
ERR2061595	O_sativa_202	O_sativa	Poaceae	leaf	cold	PRJEB22031
ERR2061596	O_sativa_203	O_sativa	Poaceae	leaf	cold	PRJEB22031
ERR2061597	O_sativa_203	O_sativa	Poaceae	leaf	cold	PRJEB22031
ERR2061598	O_sativa_203	O_sativa	Poaceae	leaf	cold	PRJEB22031
ERR2061599	O_sativa_204	O_sativa	Poaceae	leaf	salt	PRJEB22031
ERR2061600	O_sativa_204	O_sativa	Poaceae	leaf	salt	PRJEB22031
ERR2061601	O_sativa_204	O_sativa	Poaceae	leaf	salt	PRJEB22031
ERR2061602	O_sativa_205	O_sativa	Poaceae	leaf	cold	PRJEB22031
ERR2061603	O_sativa_205	O_sativa	Poaceae	leaf	cold	PRJEB22031
ERR2061604	O_sativa_205	O_sativa	Poaceae	leaf	cold	PRJEB22031
ERR2061605	O_sativa_206	O_sativa	Poaceae	leaf	cold	PRJEB22031
ERR2061606	O_sativa_206	O_sativa	Poaceae	leaf	cold	PRJEB22031
ERR2061607	O_sativa_206	O_sativa	Poaceae	leaf	cold	PRJEB22031
SRR10737336	O_sativa_301	O_sativa	Poaceae	leaf	healthy	PRJNA596579
SRR10737344	O_sativa_301	O_sativa	Poaceae	leaf	healthy	PRJNA596579
SRR10737345	O_sativa_301	O_sativa	Poaceae	leaf	healthy	PRJNA596579
SRR9888054	O_sativa_302	O_sativa	Poaceae	leaf	nitrogen	PRJNA558244
SRR9888055	O_sativa_302	O_sativa	Poaceae	leaf	nitrogen	PRJNA558244
SRR10737340	O_sativa_303	O_sativa	Poaceae	leaf	healthy	PRJNA596579
SRR10737341	O_sativa_303	O_sativa	Poaceae	leaf	healthy	PRJNA596579
SRR10737342	O_sativa_303	O_sativa	Poaceae	leaf	healthy	PRJNA596579
SRR10737337	O_sativa_304	O_sativa	Poaceae	leaf	salt	PRJNA596579
SRR10737338	O_sativa_304	O_sativa	Poaceae	leaf	salt	PRJNA596579
SRR10737339	O_sativa_304	O_sativa	Poaceae	leaf	salt	PRJNA596579
SRR10737343	O_sativa_305	O_sativa	Poaceae	leaf	salt	PRJNA596579
SRR10737346	O_sativa_305	O_sativa	Poaceae	leaf	salt	PRJNA596579
SRR10737347	O_sativa_305	O_sativa	Poaceae	leaf	salt	PRJNA596579
SRR1166453	P_armeniaca_001	P_armeniaca	Rosaceae	seed	healthy	PRJNA237575
SRR1166454	P_armeniaca_001	P_armeniaca	Rosaceae	seed	healthy	PRJNA237575
SRR4089437	P_armeniaca_001	P_armeniaca	Rosaceae	fruit	healthy	PRJNA340366
SRR4089438	P_armeniaca_001	P_armeniaca	Rosaceae	fruit	healthy	PRJNA340366
SRR4089439	P_armeniaca_002	P_armeniaca	Rosaceae	fruit	healthy	PRJNA340366
SRR4089440	P_armeniaca_002	P_armeniaca	Rosaceae	fruit	healthy	PRJNA340366
SRR4089441	P_armeniaca_003	P_armeniaca	Rosaceae	fruit	healthy	PRJNA340366
SRR4089442	P_armeniaca_003	P_armeniaca	Rosaceae	fruit	healthy	PRJNA340366
SRR4089443	P_armeniaca_004	P_armeniaca	Rosaceae	fruit	healthy	PRJNA340366
SRR4089444	P_armeniaca_004	P_armeniaca	Rosaceae	fruit	healthy	PRJNA340366
SRR1532598	P_avium_001	P_avium	Rosaceae	fruit	healthy	NA
SRR1523296	P_avium_002	P_avium	Rosaceae	fruit	healthy	NA
SRR1523295	P_avium_003	P_avium	Rosaceae	fruit	healthy	NA
SRR1523294	P_avium_004	P_avium	Rosaceae	fruit	healthy	NA
SRR1523293	P_avium_005	P_avium	Rosaceae	fruit	healthy	NA
SRR1532588	P_avium_006	P_avium	Rosaceae	fruit	healthy	NA
SRR1523290	P_avium_007	P_avium	Rosaceae	fruit	healthy	NA
SRR1523289	P_avium_008	P_avium	Rosaceae	fruit	healthy	NA
SRR1523288	P_avium_009	P_avium	Rosaceae	fruit	healthy	NA
SRR1518291	P_avium_010	P_avium	Rosaceae	fruit	healthy	NA
SRR10747000	P_avium_011	P_avium	Rosaceae	fruit	biotic	NA
SRR10747001	P_avium_011	P_avium	Rosaceae	fruit	biotic	NA
SRR10747002	P_avium_011	P_avium	Rosaceae	fruit	biotic	NA
SRR10747003	P_avium_012	P_avium	Rosaceae	fruit	healthy	NA
SRR10747004	P_avium_012	P_avium	Rosaceae	fruit	healthy	NA
SRR10747005	P_avium_012	P_avium	Rosaceae	fruit	healthy	NA
SRR8644912	P_axillaris_002	P_axillaris	Solanaceae	flower	healthy	PRJNA524676
SRR8644915	P_axillaris_002	P_axillaris	Solanaceae	flower	healthy	PRJNA524676
SRR8644914	P_axillaris_002	P_axillaris	Solanaceae	flower	healthy	PRJNA524676
SRR8644907	P_axillaris_002	P_axillaris	Solanaceae	flower	healthy	PRJNA524676
SRR8644906	P_axillaris_002	P_axillaris	Solanaceae	flower	healthy	PRJNA524676
SRR8644905	P_axillaris_002	P_axillaris	Solanaceae	flower	healthy	PRJNA524676
SRR8644904	P_axillaris_002	P_axillaris	Solanaceae	flower	healthy	PRJNA524676
SRR8644911	P_axillaris_002	P_axillaris	Solanaceae	flower	healthy	PRJNA524676
SRR8644910	P_axillaris_002	P_axillaris	Solanaceae	flower	healthy	PRJNA524676
SRR8644909	P_axillaris_002	P_axillaris	Solanaceae	flower	healthy	PRJNA524676
SRR8644908	P_axillaris_002	P_axillaris	Solanaceae	flower	healthy	PRJNA524676
SRR8644913	P_axillaris_002	P_axillaris	Solanaceae	flower	healthy	PRJNA524676
DRR126329	P_axillaris_003	P_axillaris	Solanaceae	stem	healthy	PRJDB6807
DRR126328	P_axillaris_004	P_axillaris	Solanaceae	stem	healthy	PRJDB6807
DRR126327	P_axillaris_005	P_axillaris	Solanaceae	leaf	healthy	PRJDB6807
SRR4309579	P_communis_001	P_communis	Rosaceae	fruit	healthy	PRJNA344800
SRR4309580	P_communis_001	P_communis	Rosaceae	fruit	healthy	PRJNA344800
SRR4309581	P_communis_001	P_communis	Rosaceae	fruit	healthy	PRJNA344800
SRR4309582	P_communis_002	P_communis	Rosaceae	fruit	cold	PRJNA344800
SRR4309583	P_communis_002	P_communis	Rosaceae	fruit	cold	PRJNA344800
SRR4309584	P_communis_002	P_communis	Rosaceae	fruit	cold	PRJNA344800
SRR4309585	P_communis_003	P_communis	Rosaceae	fruit	cold	PRJNA344800
SRR4309586	P_communis_003	P_communis	Rosaceae	fruit	cold	PRJNA344800
SRR4309587	P_communis_003	P_communis	Rosaceae	fruit	cold	PRJNA344800
SRR2976058	P_dulcis_001	P_dulcis	Rosaceae	flower	healthy	PRJNA244904
SRR2976060	P_dulcis_001	P_dulcis	Rosaceae	flower	healthy	PRJNA244904
SRR2976061	P_dulcis_002	P_dulcis	Rosaceae	flower	cold	PRJNA244904
SRR2976062	P_dulcis_002	P_dulcis	Rosaceae	flower	cold	PRJNA244904
SRR12328727	P_glaucum_001	P_glaucum	Poaceae	leaf	drought	PRJNA607164
SRR12328726	P_glaucum_002	P_glaucum	Poaceae	leaf	drought	PRJNA607164
SRR6327851	P_glaucum_003	P_glaucum	Poaceae	root	healthy	PRJNA419859
SRR6327852	P_glaucum_003	P_glaucum	Poaceae	root	healthy	PRJNA419859
SRR6327854	P_glaucum_003	P_glaucum	Poaceae	root	healthy	PRJNA419859
SRR6327853	P_glaucum_004	P_glaucum	Poaceae	root	healthy	PRJNA419859
SRR6327855	P_glaucum_004	P_glaucum	Poaceae	root	healthy	PRJNA419859
SRR6327856	P_glaucum_004	P_glaucum	Poaceae	root	healthy	PRJNA419859
SRR6327857	P_glaucum_005	P_glaucum	Poaceae	root	drought	PRJNA419859
SRR6327858	P_glaucum_005	P_glaucum	Poaceae	root	drought	PRJNA419859
SRR6327860	P_glaucum_005	P_glaucum	Poaceae	root	drought	PRJNA419859
SRR6327859	P_glaucum_006	P_glaucum	Poaceae	root	drought	PRJNA419859
SRR6327861	P_glaucum_006	P_glaucum	Poaceae	root	drought	PRJNA419859
SRR6327862	P_glaucum_006	P_glaucum	Poaceae	root	drought	PRJNA419859
SRR6257634	P_patens_001	P_patens	Funariaceae	other	healthy	NA
SRR6257561	P_patens_002	P_patens	Funariaceae	other	healthy	NA
SRR4473676	P_patens_003	P_patens	Funariaceae	other	healthy	NA
SRR4473675	P_patens_004	P_patens	Funariaceae	other	healthy	NA
SRR4473674	P_patens_005	P_patens	Funariaceae	other	healthy	NA
SRR4473673	P_patens_006	P_patens	Funariaceae	other	healthy	NA
SRR5631955	P_persica_001	P_persica	Rosaceae	leaf	biotic	PRJNA388577
SRR5631956	P_persica_001	P_persica	Rosaceae	leaf	biotic	PRJNA388577
SRR5631981	P_persica_001	P_persica	Rosaceae	leaf	biotic	PRJNA388577
SRR5631982	P_persica_001	P_persica	Rosaceae	leaf	biotic	PRJNA388577
SRR5631985	P_persica_001	P_persica	Rosaceae	leaf	biotic	PRJNA388577
SRR5631986	P_persica_001	P_persica	Rosaceae	leaf	biotic	PRJNA388577
SRR5631957	P_persica_002	P_persica	Rosaceae	leaf	biotic	PRJNA388577
[truncated: 1,173 more rows]
